# Supplementary material for: Neutral tetrathia[22]annulene[2.1.2.1] based field-effect transistors: improved on/off ratio defies ring puckering
Source: Royal Society of Chemistry journal article supplement (doi:10.1039/c2cc37004b), 2012-01-01
Supplement: c2cc37004b.pdf [file c2cc37004b.pdf]

## Supporting Information

# Neutral tetrathia[22]annulene[2.1.2.1] based field-effect transistors. improved *on/off* ratio defies ring puckering†

Kamaljit Singh,\* Tarunpreet Singh Virk, Jing Zhang, Wei Xu and Daoben Zhu\*

### Table of Contents

|                                                                    |     |
|--------------------------------------------------------------------|-----|
| General Information                                                | S2  |
| Experimental Section                                               | S3  |
| Copies of <sup>1</sup> H, <sup>13</sup> C NMR, IR and Mass Spectra | S6  |
| Theoretical Calculations                                           | S34 |
| UV-Visible Spectra                                                 | S51 |
| Cyclic Voltamogram                                                 | S52 |
| TGA graphs                                                         | S53 |
| X-Rays                                                             | S54 |
| Experimental details for OFET Device fabrication                   | S57 |
| Cif files of 11a                                                   | S59 |

## General Information

$^1\text{H}$  (400 MHz),  $^{13}\text{C}$  (100 MHz) NMR spectra were recorded on a BRUKER AVANCE II 400 NMR Spectrometer and JEOL-FT NMR-AL Spectrometer at 300MHz. Tetramethylsilane (TMS) served as the internal standard (0 ppm for  $^1\text{H}$  and 77.0 ppm for  $^{13}\text{C}$ ) and  $\text{CDCl}_3$  was used as solvent. The following abbreviations were used to express the multiplicities: s = singlet; d = doublet; t = triplet; q = quartet; m = multiplet; br = broad. Data are reported as follows: chemical shifts in ppm ( $\delta$ ), integration, coupling constant J (Hz) and assignment. Mass spectra were recorded on Bruker Daltonics esquire3000\_00037 mass spectrometer. Elemental analyses were performed with a Thermoelectron FLASH EA1112 CHNS analyzer and were within  $\pm 0.4\%$  of the theoretical values. IR spectrum was recorded on VARIAN 660-IR Fourier-Transform Spectrophotometer in range 400-4000  $\text{cm}^{-1}$  using KBr as medium. UV-Vis spectra were recorded on a SHIMADZU 1601 PC spectrophotometer, with a quartz cuvette (path length, 1 cm) and studies were performed in AR grade DCM. TGA were performed on a TA instrument with a DTG-60 detector with a temp. rise of  $10^\circ\text{C}/\text{minute}$  under nitrogen atmosphere. Electrochemical studies were carried out on CHI 660C Electrochemical Workstation with a conventional three-electrode configuration consisting of platinum working electrode (2 mm diameter), counter electrode and Ag/AgCl as reference electrode. The experiments were carried out on  $10^{-4}$  M solutions of samples in DCM containing 0.1 M tetrabutylammonium hexafluorophosphate ( $\text{TBAPF}_6$ ) as supporting electrolyte at room temperature. Deoxygenation of the solutions was achieved by bubbling nitrogen for 30 min and the working electrode was cleaned after each run. The cyclic voltammograms were recorded with a scan rate of  $100 \text{ mVs}^{-1}$ . All reactions were monitored by thin-layer chromatography carried out on Merck pre-coated TLC plates (silica gel 60 F<sub>254</sub>, 0.25 mm), visualization by using UV (254 nm). Melting points were determined in open capillaries and are uncorrected. Reactions that required anhydrous conditions were carried out under the blanket of deoxygenated (BASF catalyst) anhydrous nitrogen gas in oven/flame dried glassware. The products were purified by flash column chromatography on silica gel 60-120 mesh. All reagents and chemicals were purchased from Sigma-Aldrich. DMF, Diethyl ether,  $\text{TiCl}_4$ , Pyridine and DCM were purchased locally, dried and distilled prior to use. n-Buli was prepared and stored under a blanket of dry nitrogen gas. THF and toluene were distilled from sodium/benzophenone (benzophenone ketyl). Anhydrous DCM was stored over fused  $\text{CaCl}_2$  and distilled before use. Zinc dust was activated prior to use using standard (2M

HCl and subsequent water washing) methods. DDQ and hydrazine hydrate were purchased from Sigma-Aldrich, and were used as received. All theoretical studies were performed with a GAUSSIAN 09 software package.

## Experimental Section

### General procedure for the synthesis of *meso*-substituted dithienyl methane dialdehydes (9a,b):

To a solution of *meso-p*-florophenyl dithienyl methane 1g (3.65 mmol) in dry diethyl ether (33ml) was added dropwise, *n*-Buli (8.2 mmol) at r.t.. to the deep red solution so obtained was added dropwise, anhydrous DMF (8 mmol) in diethyl ether. After 1 hour stirring, the mixture was washed successively with water, dil. HCl, water and sodium bicarbonate. The organic phase was then dried and vacuum evaporated. The residue was chromatographed on silica to give (1) as a deep red oil (750 mg) 62.3%.

The characteristic data for **8a**, **8b**, **9a** and **9b** is presented below.

#### *m*-Chlorophenyl-di(thien-2yl)methane, **8a**

(Yield = 16%), <sup>1</sup>H NMR (400 MHz, CDCl<sub>3</sub>): δ (ppm) 7.27 (1H, m), 7.15-7.22 (5H, m), 6.90-6.93 (2H, m), 6.79-6.80 (2H, m), 5.81 (1H, s); <sup>13</sup>C NMR (100 MHz, CDCl<sub>3</sub>): δ (ppm) 146.5, 145.5, 134.3, 129.7, 128.4, 127.3, 126.6, 126.4, 126.2, 124.9, 46.9; *m/z* 290.5, colourless oil.

#### *p*-Florophenyl-di(thien-2yl)methane, **8b**

(Yield = 15%), <sup>1</sup>H NMR (400 MHz, CDCl<sub>3</sub>): δ (ppm) 7.27 (2H, m), 7.19-7.22 (4H, m), 6.93 (2H, t, *J* = 4.22 Hz), 6.79 (2H, d, *J* = 4 Hz), 5.82 (1H, s); <sup>13</sup>C NMR (100 MHz, CDCl<sub>3</sub>): δ (ppm) 147, 142.2, 133, 129.7, 128.7, 126.7, 126.2, 124.9, 46.8; *m/z* 274.2, colourless oil.

#### *m*-Chlorophenyl-di(5-formylthien-2yl)methane, **9a**

(Yield = 64%), <sup>1</sup>H NMR (400 MHz, CDCl<sub>3</sub>) 9.86 (2H, s), 7.65 (2H, d, *J* = 3.6 Hz), 7.30-7.32 (2H, m), 7.26 (1H, s), 7.16-7.18 (1H, m), 6.98 (2H, dd, *J* = 2.8 Hz), 5.87 (1H, s); <sup>13</sup>C NMR (100 MHz, CDCl<sub>3</sub>) 182.7, 155.5, 143.5, 142.8, 136.3, 135, 130.4, 128.5, 128.4, 127.9, 126.4, 48.1; *m/z* 347 (M, 100%).

***p*-Florophenyl-di(5-formylthien-2yl)methane, 9b**

(Yield = 62.3%), <sup>1</sup>H NMR (400 MHz, CDCl<sub>3</sub>) 9.83 (2H, s), 7.63-7.65 (2H, m), 7.23-7.27 (2H, m), 7.01-7.06 (2H, m), 6.95-6.96 (2H, m), 5.89 (1H, s); <sup>13</sup>C NMR (100 MHz, CDCl<sub>3</sub>) 182.7, 156.2, 143.2, 136.2, 129.9, 129.8, 127.7, 116.1, 115.8, 47.7; *m/z* 331 (M<sup>+</sup>, 100%).

**General procedure for the synthesis of the *meso*-substituted dihydrotetrathia annulenes 10a and 10b:**

To a stirring suspension of zinc dust (38 mmol) in 200 ml of THF maintained under nitrogen atmosphere, a solution of 19.6 ml of 1.0 M TiCl<sub>4</sub> (in CH<sub>2</sub>Cl<sub>2</sub>) was added over 20 minutes. The reaction mixture was refluxed for 1 hour, and treated with a solution of appropriate dialdehyde (1.78 mmol) and pyridine (35.6 mmol) dissolved in 200 ml of THF. The addition was made using a hypodermic syringe over 40 minutes to the gently refluxing suspension. After refluxing under nitrogen for 18 hours, the reaction was carefully quenched with a solution of aqueous K<sub>2</sub>CO<sub>3</sub> (10%, 100 ml). The reaction mixture was filtered, and the filtrate was concentrated under reduced pressure and the residue extracted with 300 ml methylene chloride. The extract was washed with water (2 x 50 ml) and dried over anhydrous sodium sulfate. The solvent was evaporated under reduced pressure and the residue was chromatographed (over silica) to isolate the **10a,b** as light green solids (25%), (**10a,b**, m.pt. >280 °C).

***Meso-m*-chlorophenyldihydrotetrathia[22]annulene[2,1,2,1] 10a**, (Yield = 13%), <sup>1</sup>H NMR (400 MHz, CDCl<sub>3</sub>) 7.31 (2H, s), 7.20-7.27 (6H, m), 6.82-6.83 (4H, m), 6.65 (1H, dd, *J* = 4 Hz), 6.61 (3H, dd, *J* = 2.72 Hz), 6.51 (4H, s), 5.71 (2 H, m); <sup>13</sup>C NMR (100 MHz, CDCl<sub>3</sub>) 148.2, 144.7, 138.7, 134.3, 129.8, 128.6, 128.5, 127.3, 126.7, 125.8, 123.6, 47.8; IR (KBr): 687, 763, 807, 889, 953, 1025, 1254, 1427, 1473, 1570, 1590, 2961, 3014, 3060, 3433 cm<sup>-1</sup>; (M+K) 668.

***Meso-p*-florophenyldihydrotetrathia[22]annulene[2,1,2,1] 10b**, (Yield = 15%), <sup>1</sup>H NMR (400 MHz, CDCl<sub>3</sub>) 7.26-7.30 (4H, m), 6.99-7.03 (4H, m), 6.80-6.82 (4H, m), 6.63 (2H, dd, *J* = 4 Hz), 6.60 (2H, dd, *J* = 4 Hz), 6.5 (4H, m), 5.73-5.75 (2H, m); <sup>13</sup>C NMR (100 MHz, CDCl<sub>3</sub>) 148.9, 138.6, 130, 128.6, 125.6, 123.6, 123.4, 115.5, 115.2, 47.4; IR (KBr): 724, 793, 810, 860, 1025, 1158, 1222, 1389, 1506, 1600, 1621, 1892, 2970, 3020, 3065, 3401 cm<sup>-1</sup>; (M + K) 635.

**General procedure for the synthesis of the *meso*-substituted tetrathia[22]annulenes **11a** and **11b**:**

To a solution of **10a** (0.2 mmol) in 5 ml toluene, was added under nitrogen with stirring, a solution of DDQ (0.5 mmol) in 5 ml toluene. Shortly after mixing the two solutions, purple precipitates formed and the reaction mixture was stirred for additional 3 h. The purple precipitates were filtered and added to 3 ml of hydrazine hydrate (98%). After boiling for 10 minutes, the solid was filtered, washed with water, and dried. The resulting product was dissolved in methylene chloride and chromatographed on silica (DCM). Evaporation of the purple solution gave **11a** (50%) as shining metallic purple solid (**11a,b**, m.pt. >280 °C).

**Meso-*m*-chlorophenyltetrathia[22]annulene[2,1,2,1] 11a**, (Yield = 50%), <sup>1</sup>H NMR (400 MHz, CDCl<sub>3</sub>) 11.09 (4H, s), 10.41 (4H, d, J= 4 Hz), 9.98 (4H, d, J= 4.4 Hz), 8.47 (2H, s), 8.33-8.35 (2H, m), 7.91-7.97 (4H, m); IR (KBr): 776, 810, 1069, 1168, 1359, 1464, 1588, 1632, 2923, 3398 cm<sup>-1</sup>; Anal. Calcd. (%) for C<sub>34</sub>H<sub>20</sub>S<sub>4</sub>Cl<sub>2</sub>: C, 65.07; H, 3.19; S, 20.41; Found: C, 65.09; H, 3.19; S, 20.40; *m/z* 627.9 (100%).

**Meso-*p*-fluorophenyltetrathia[22]annulene[2,1,2,1] 11b**, (Yield = 45%), <sup>1</sup>H NMR (400 MHz, CDCl<sub>3</sub>) 11.10 (4H, s), 10.41 (4H, d, J= 4.8 Hz), 9.98 (4H, d, J= 4.8 Hz), 8.41-8.44 (4H, m), 7.67-7.72 (4H, m); IR (KBr): 809, 1154, 1217, 1504, 3055 cm<sup>-1</sup>; Anal. Calcd. (%) for C<sub>34</sub>H<sub>20</sub>S<sub>4</sub>F<sub>2</sub>: C, 68.68; H, 3.36; S, 21.54; Found: C, 68.66; H, 3.35; S, 21.53; *m/z* 594 (100%).

### Copies of $^1\text{H}$ , $^{13}\text{C}$ NMR, IR and Mass Spectra:

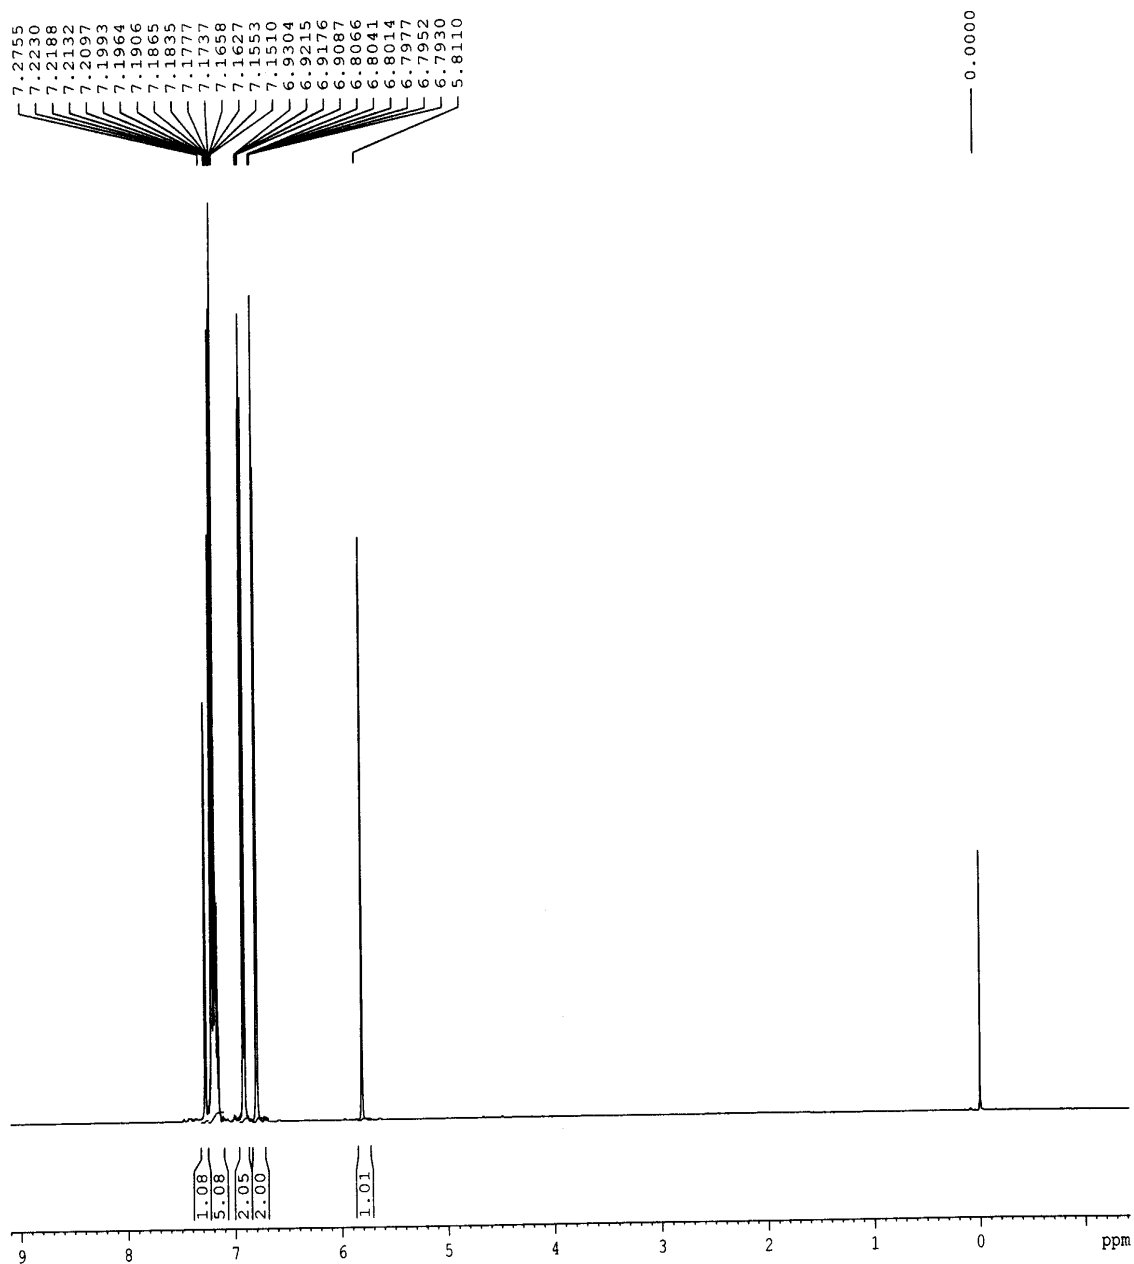

Figure S1:  $^1\text{H}$  NMR spectrum of **8a**.

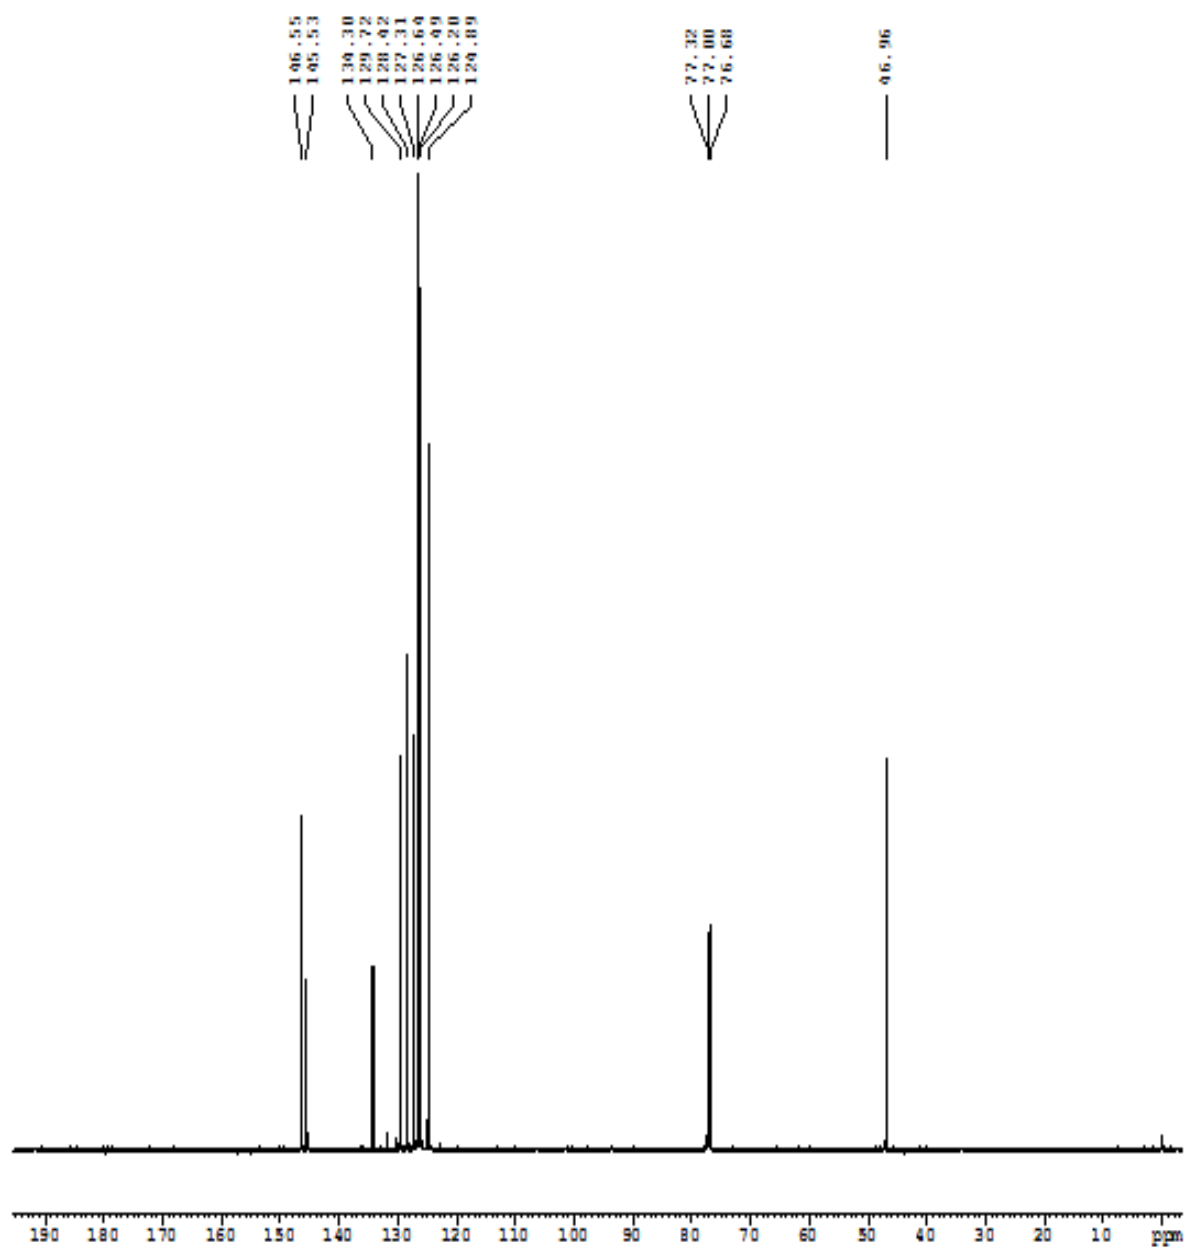

**Figure S2:**  $^{13}\text{C}$  NMR spectrum of **8a**.

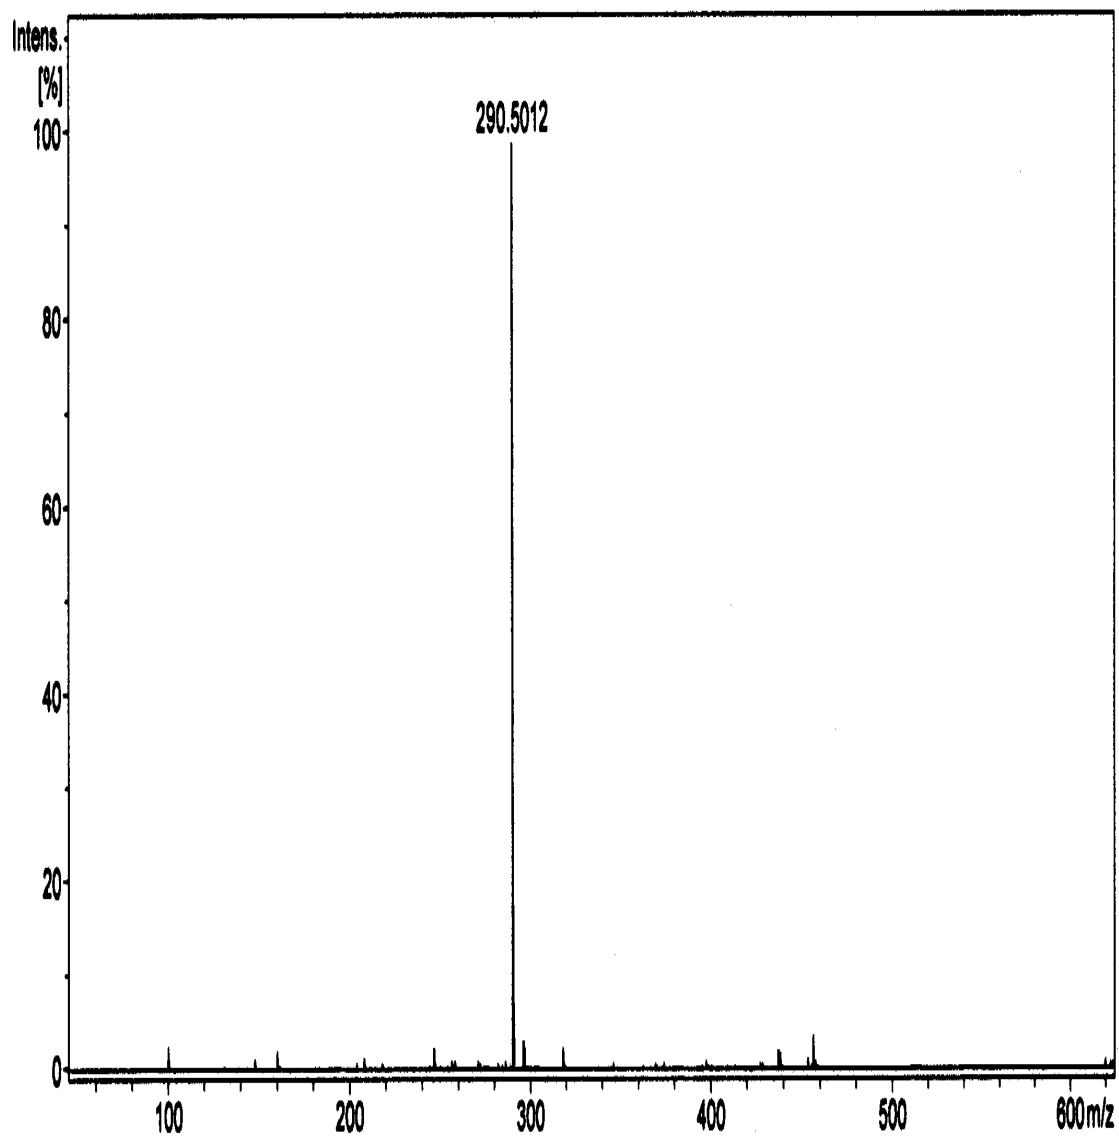

Figure S3: Mass spectrum of **8a**.



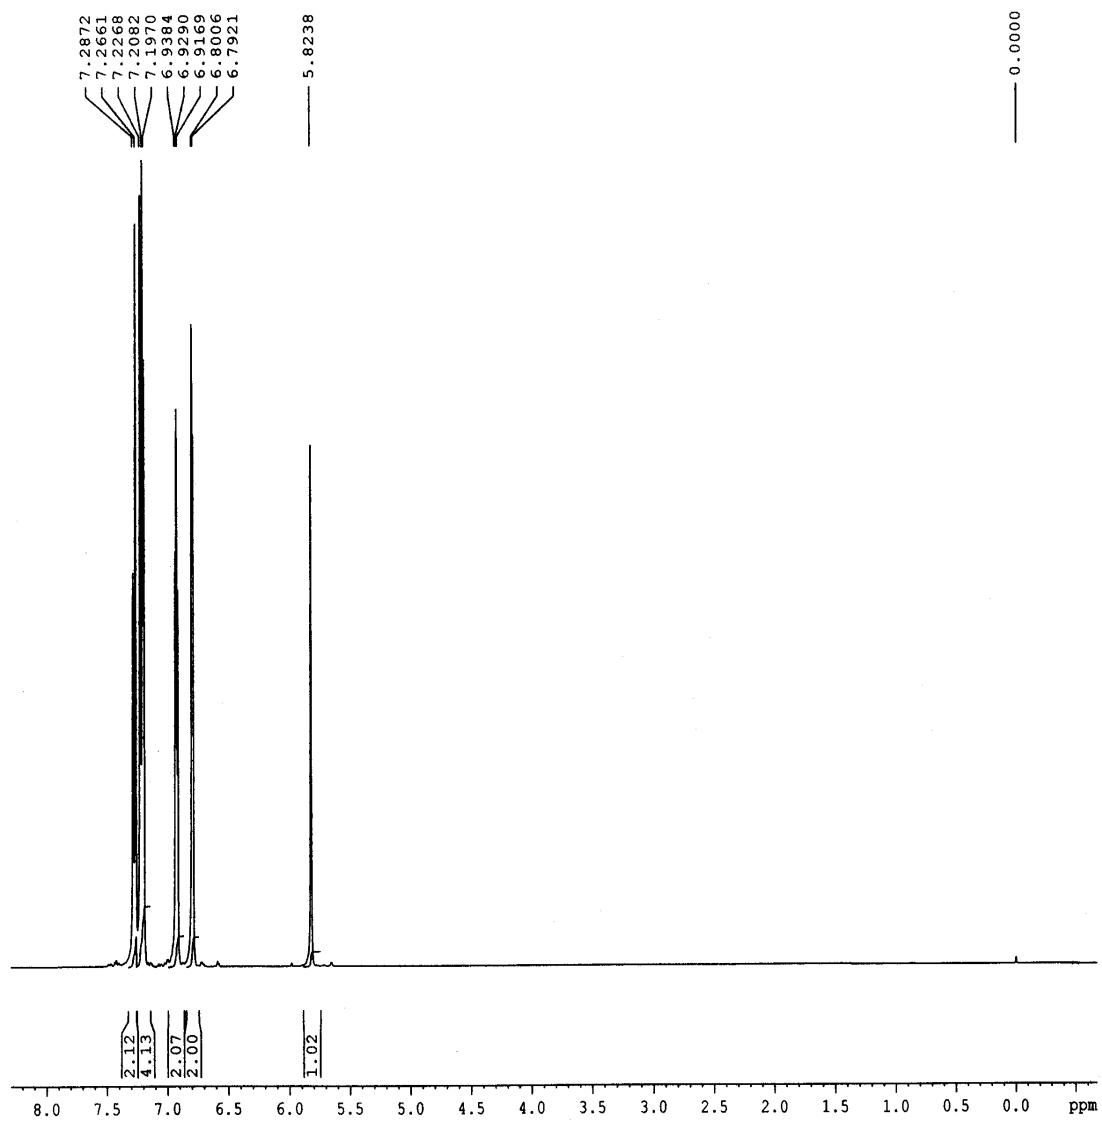

Figure S4:  $^1\text{H}$  NMR spectrum of **8b**.

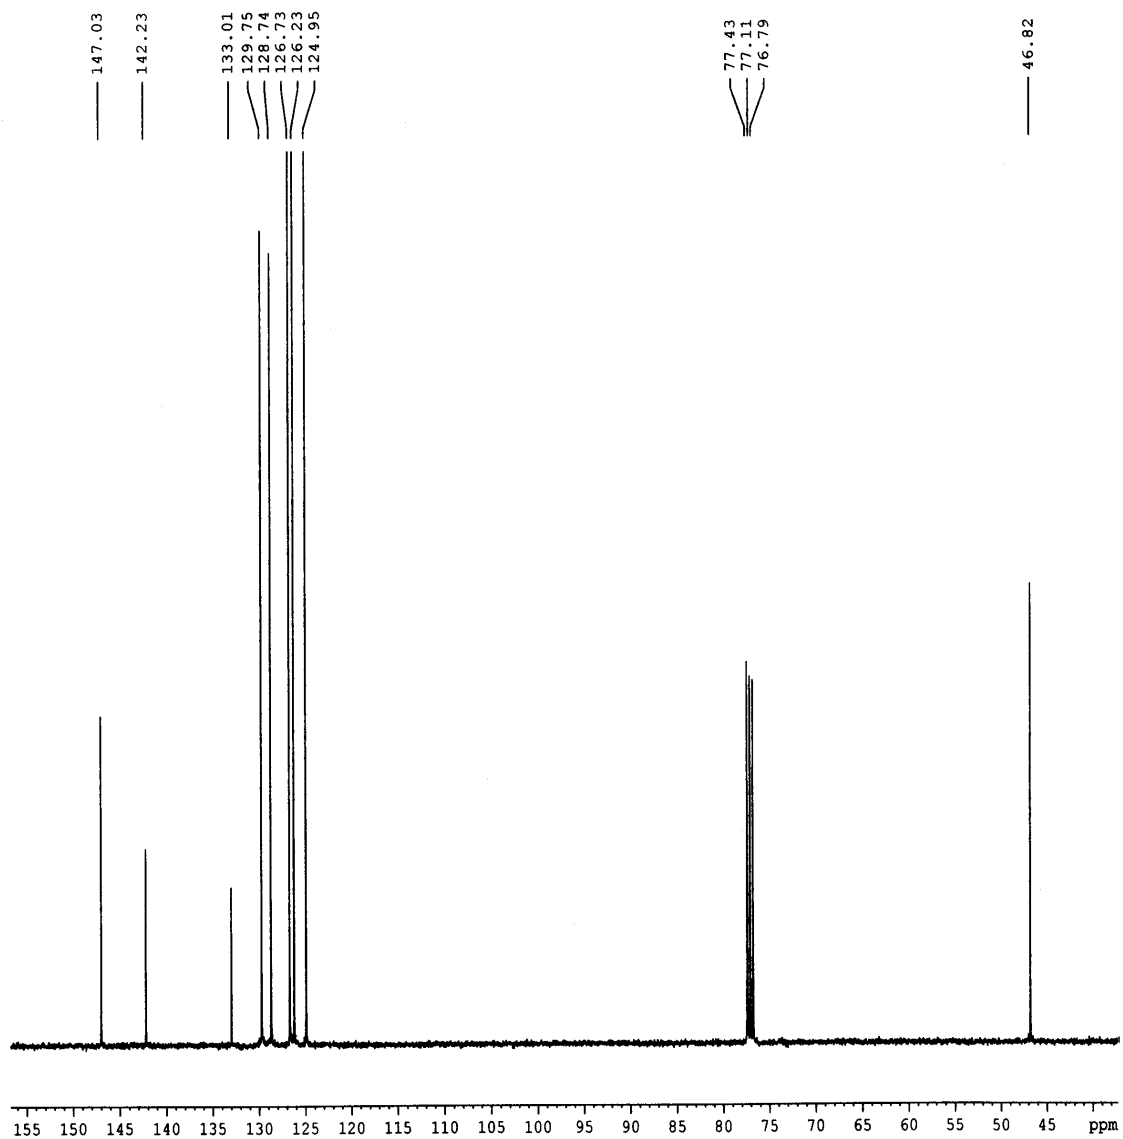

Figure S5:  $^{13}\text{C}$  NMR spectrum of **8b**.

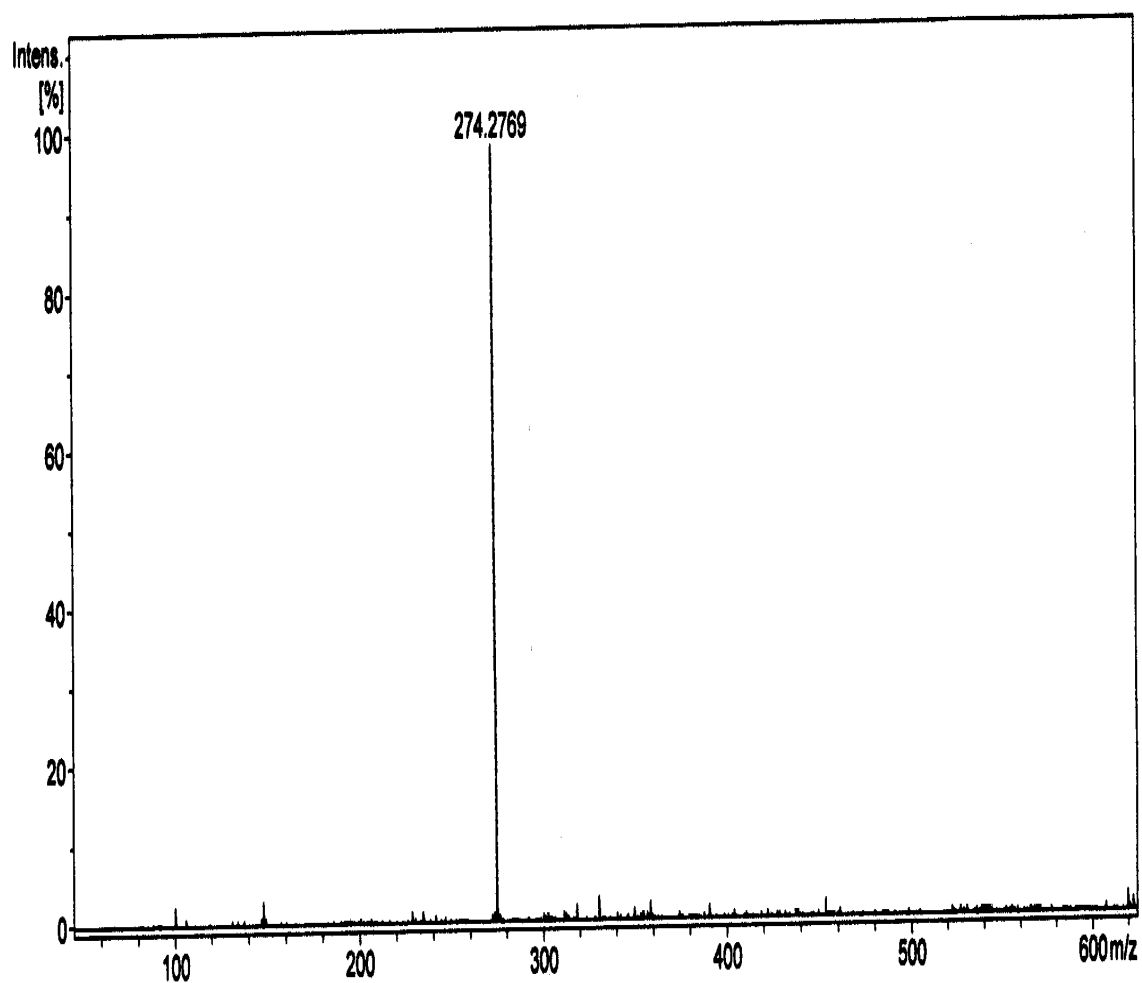

Figure S6: Mass spectrum of **8b**.

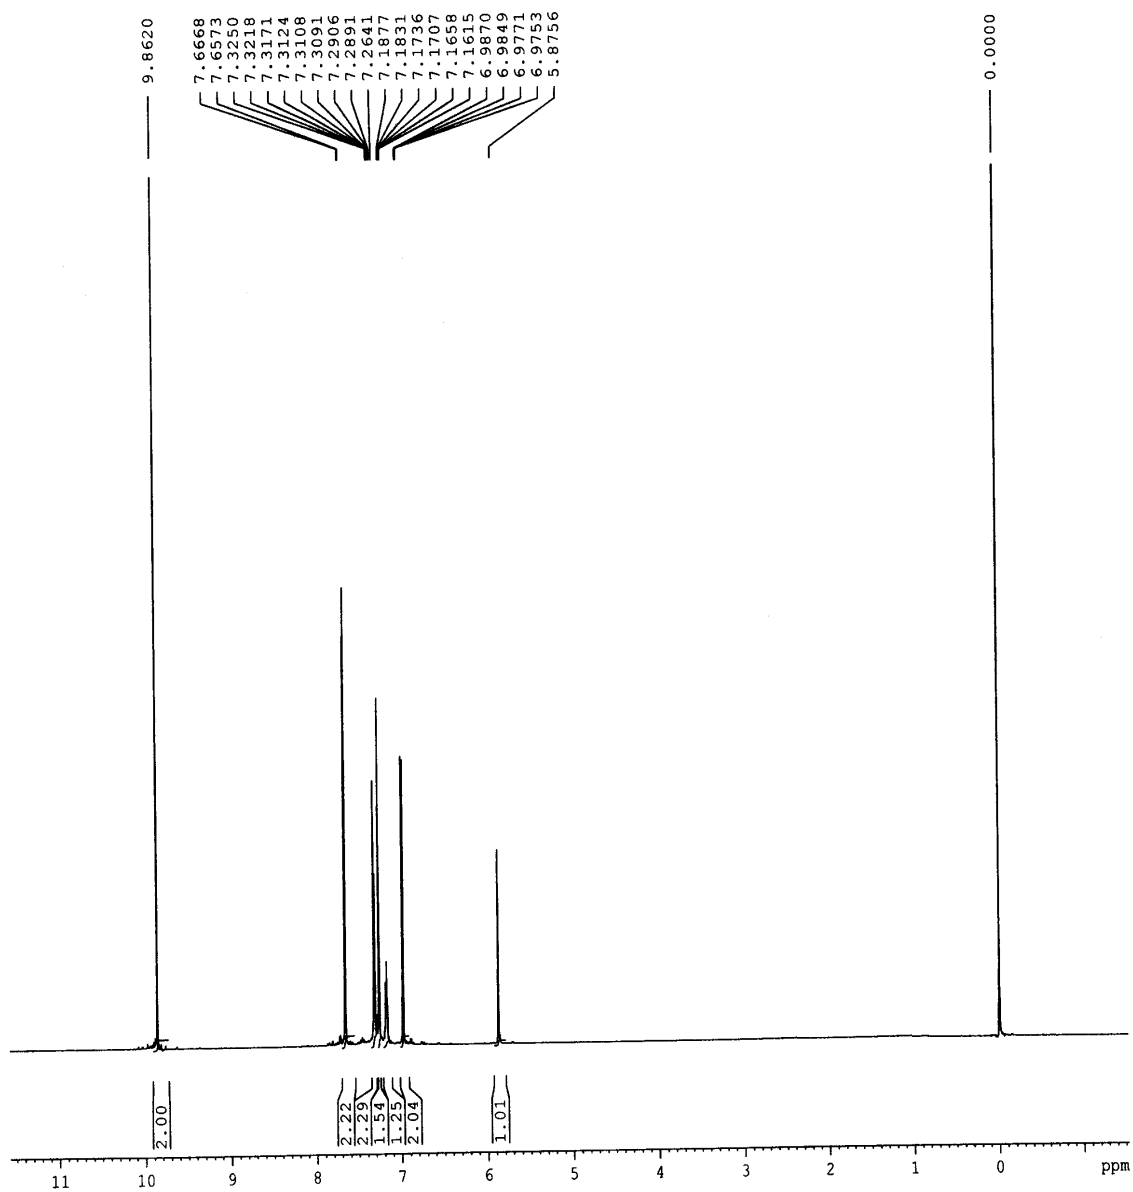

Figure S7:  $^1\text{H}$  NMR spectrum of **9a**.

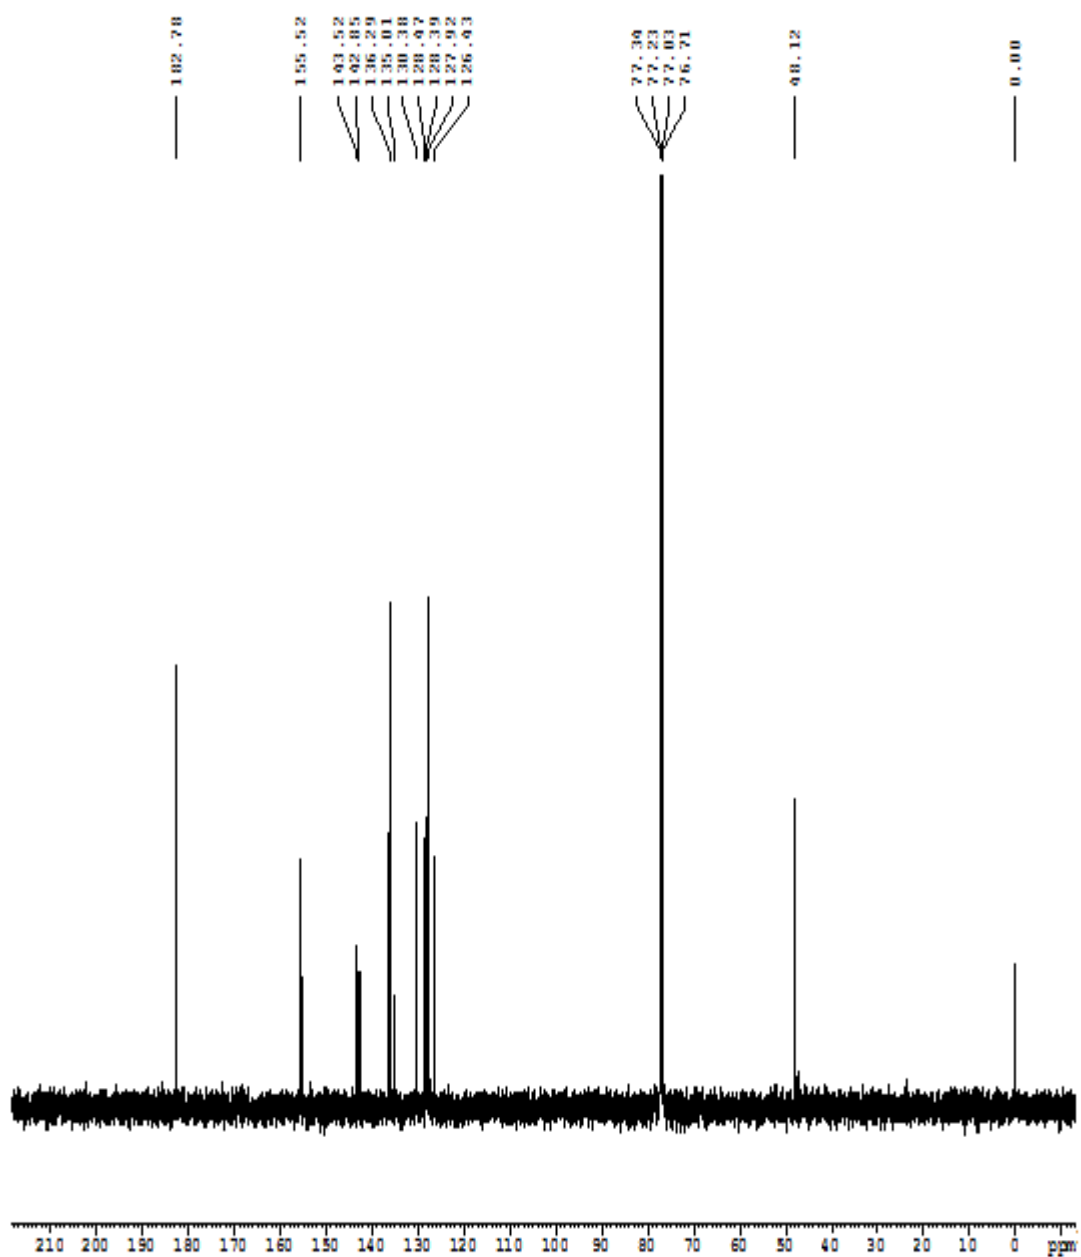

Figure S8:  $^{13}\text{C}$  NMR spectrum of **9a**.

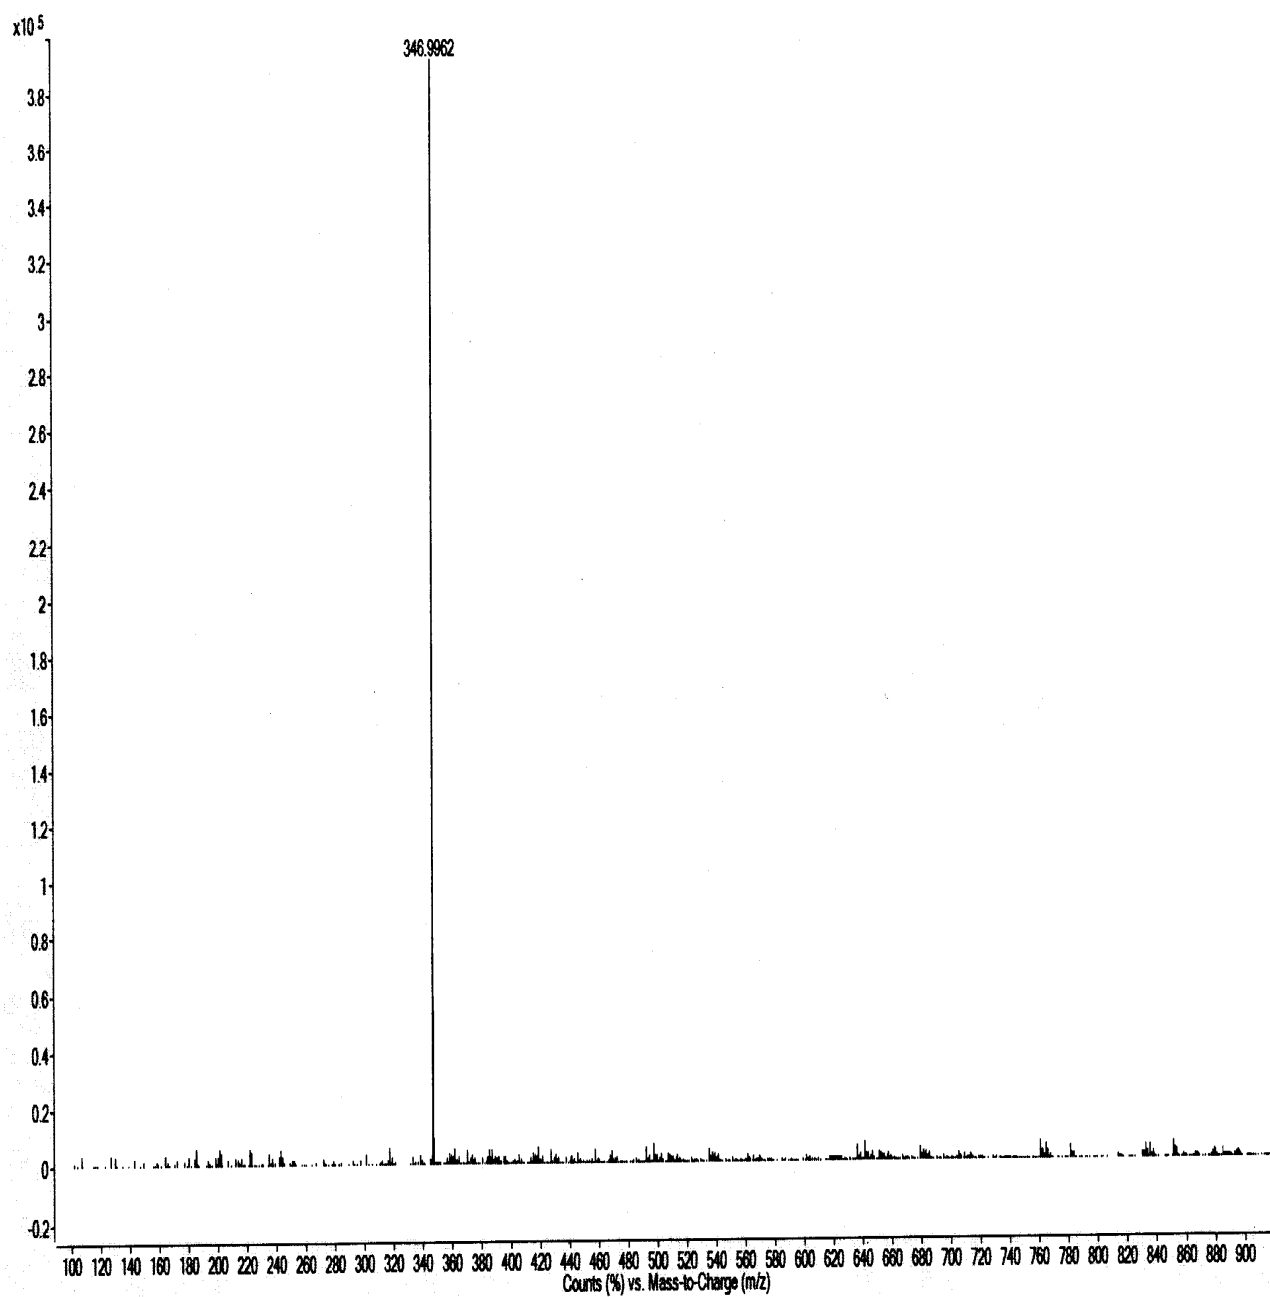

Figure S9: Mass spectrum spectrum of **9a**.

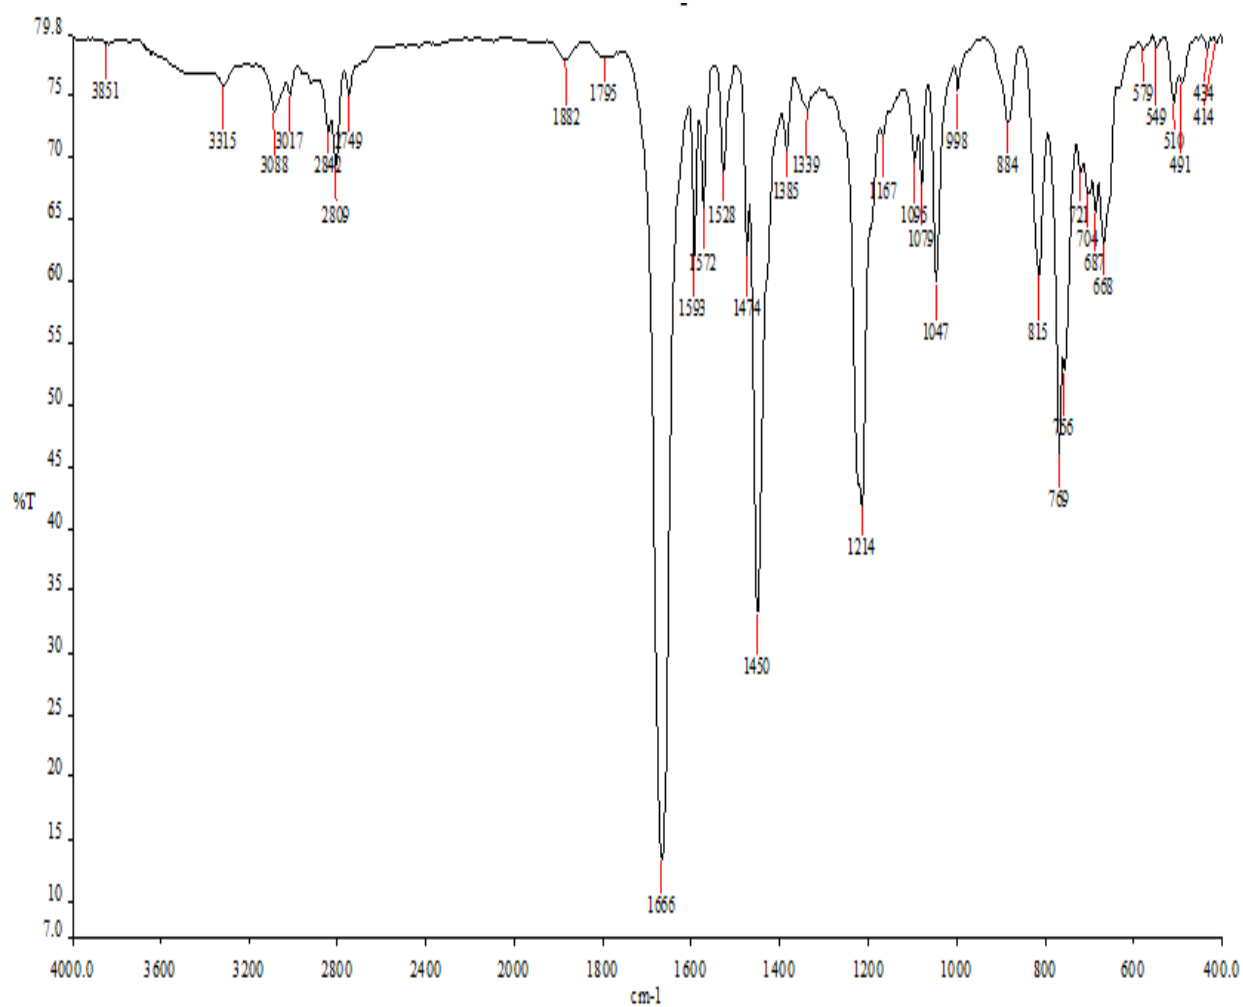

Figure S10: IR Spectrum of 9a.

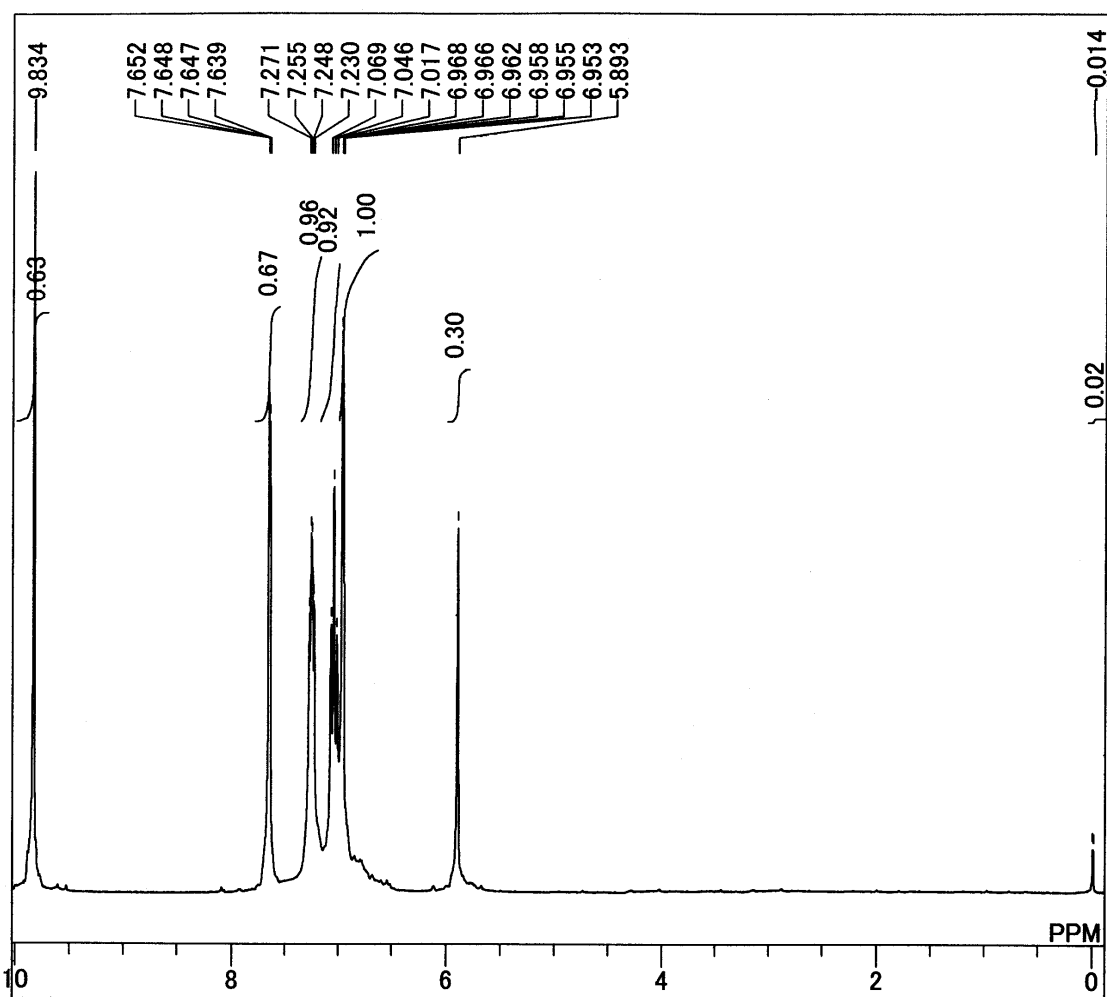

Figure S11:  $^1\text{H}$  NMR spectrum of **9b**.



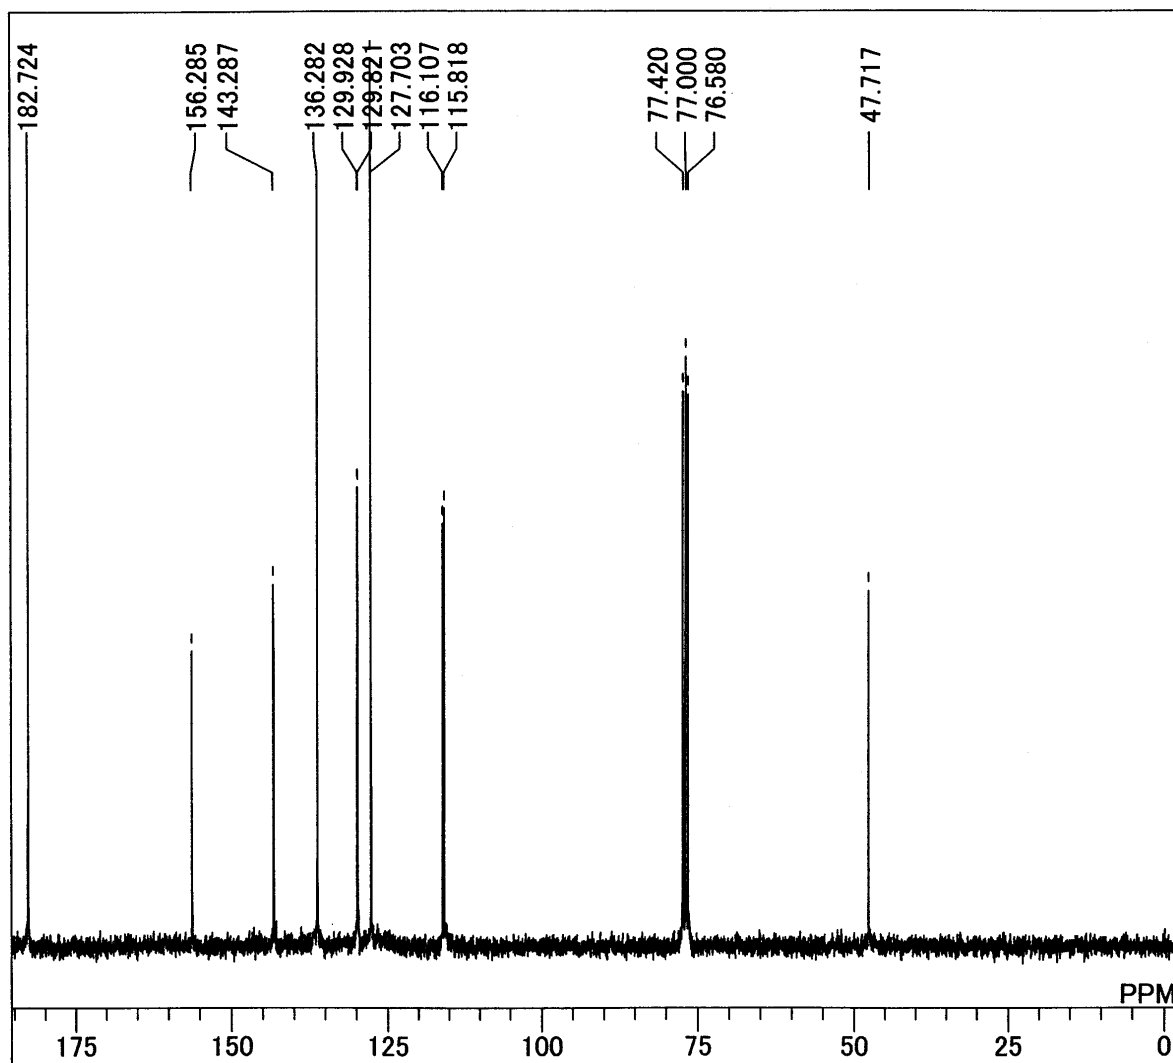

Figure S12: <sup>13</sup>C NMR spectrum of **9b**.

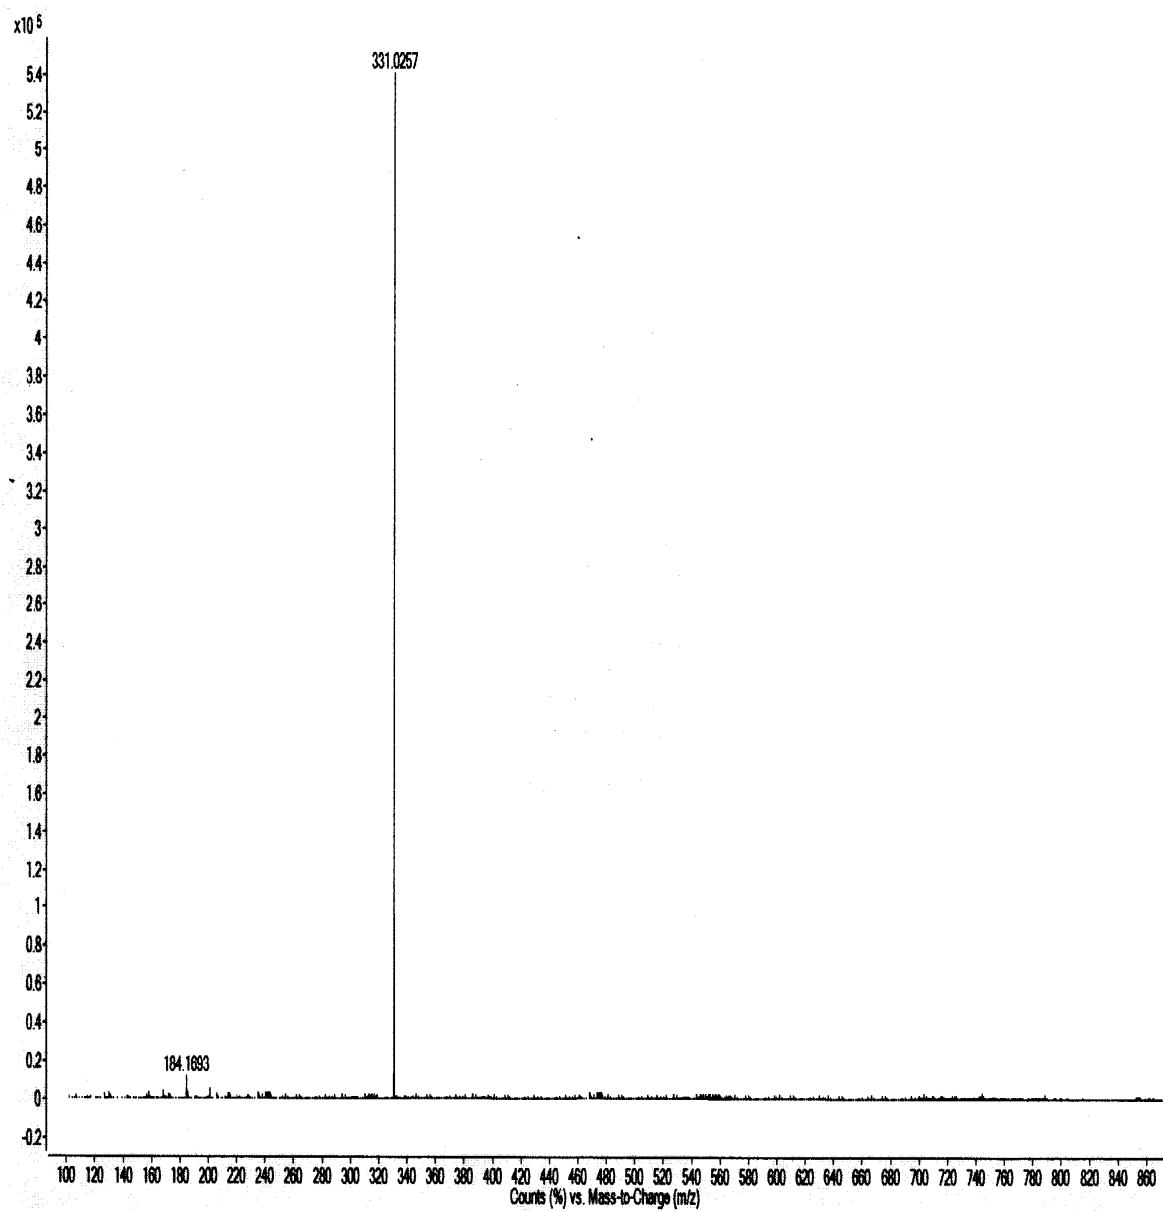

Figure S13: Mass spectrum of **9b**.

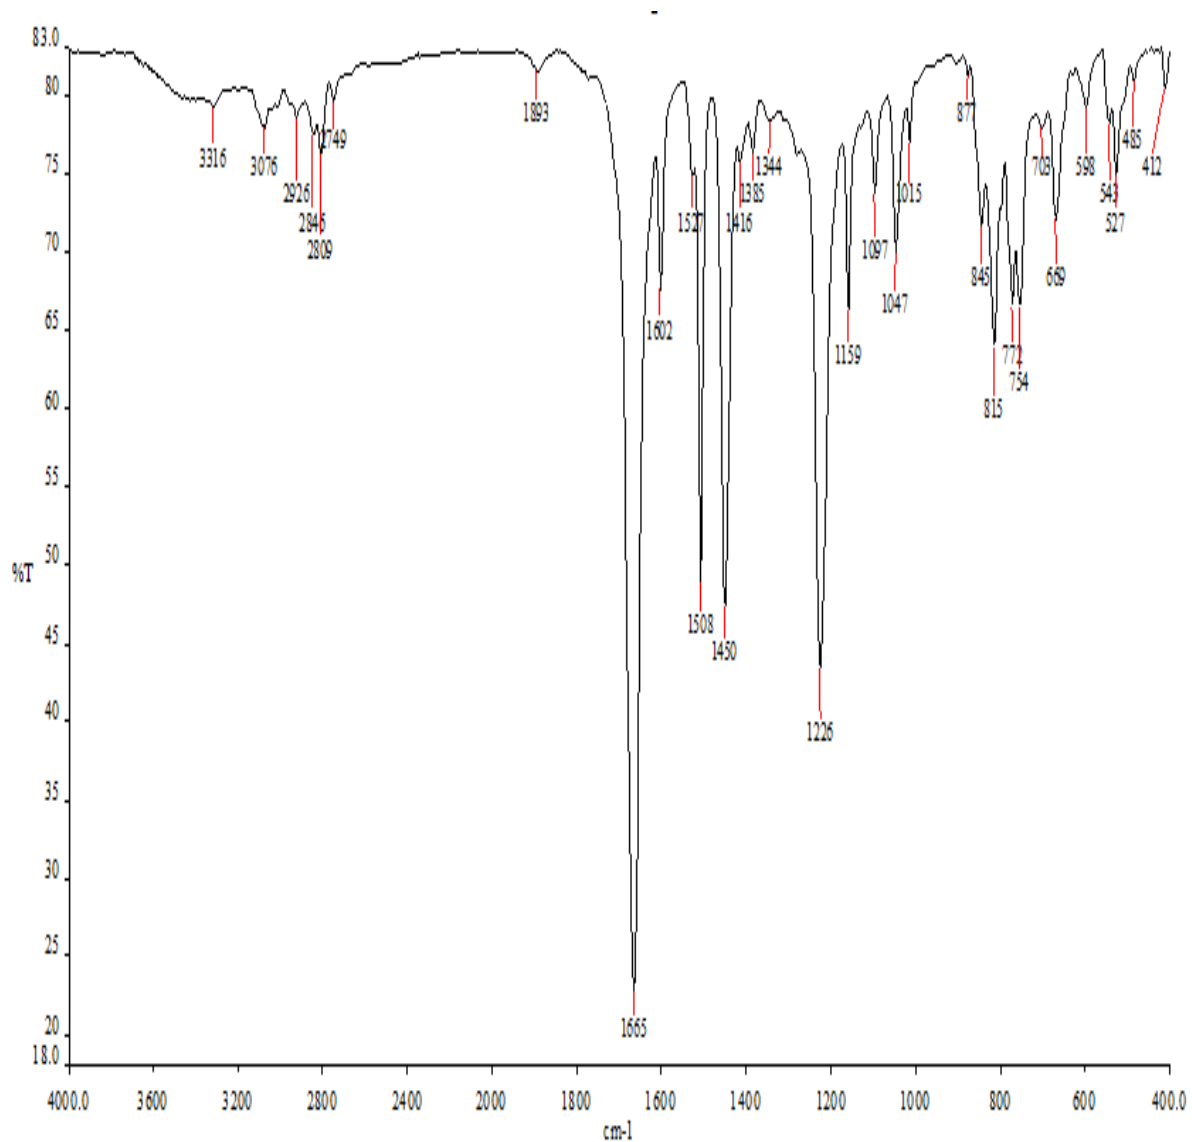

Figure S14: IR Spectrum of 9b.

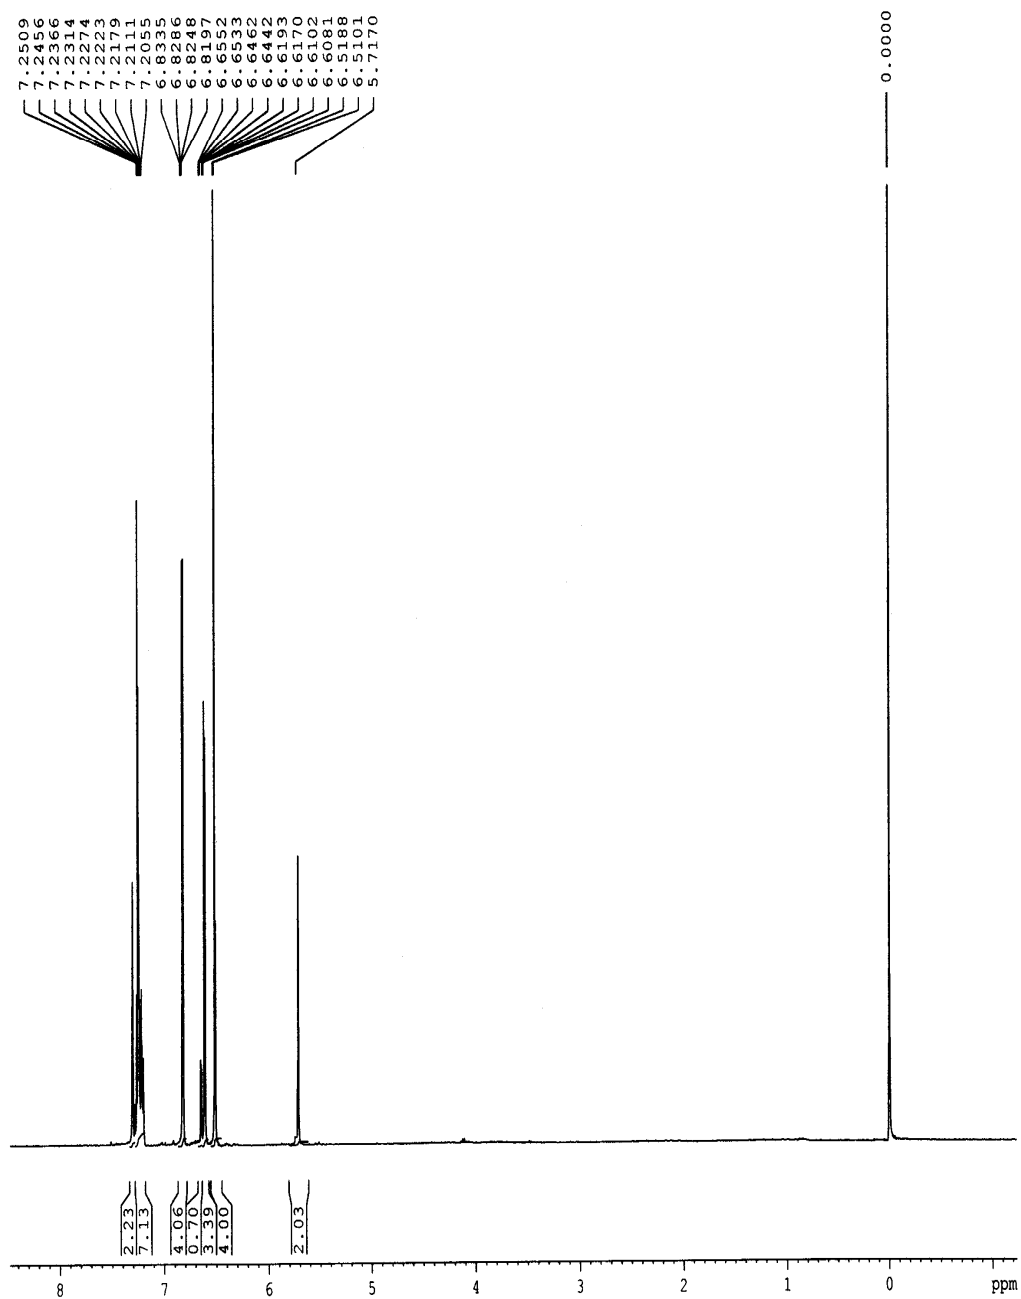

Figure S15: <sup>1</sup>H NMR Spectrum of 10a.

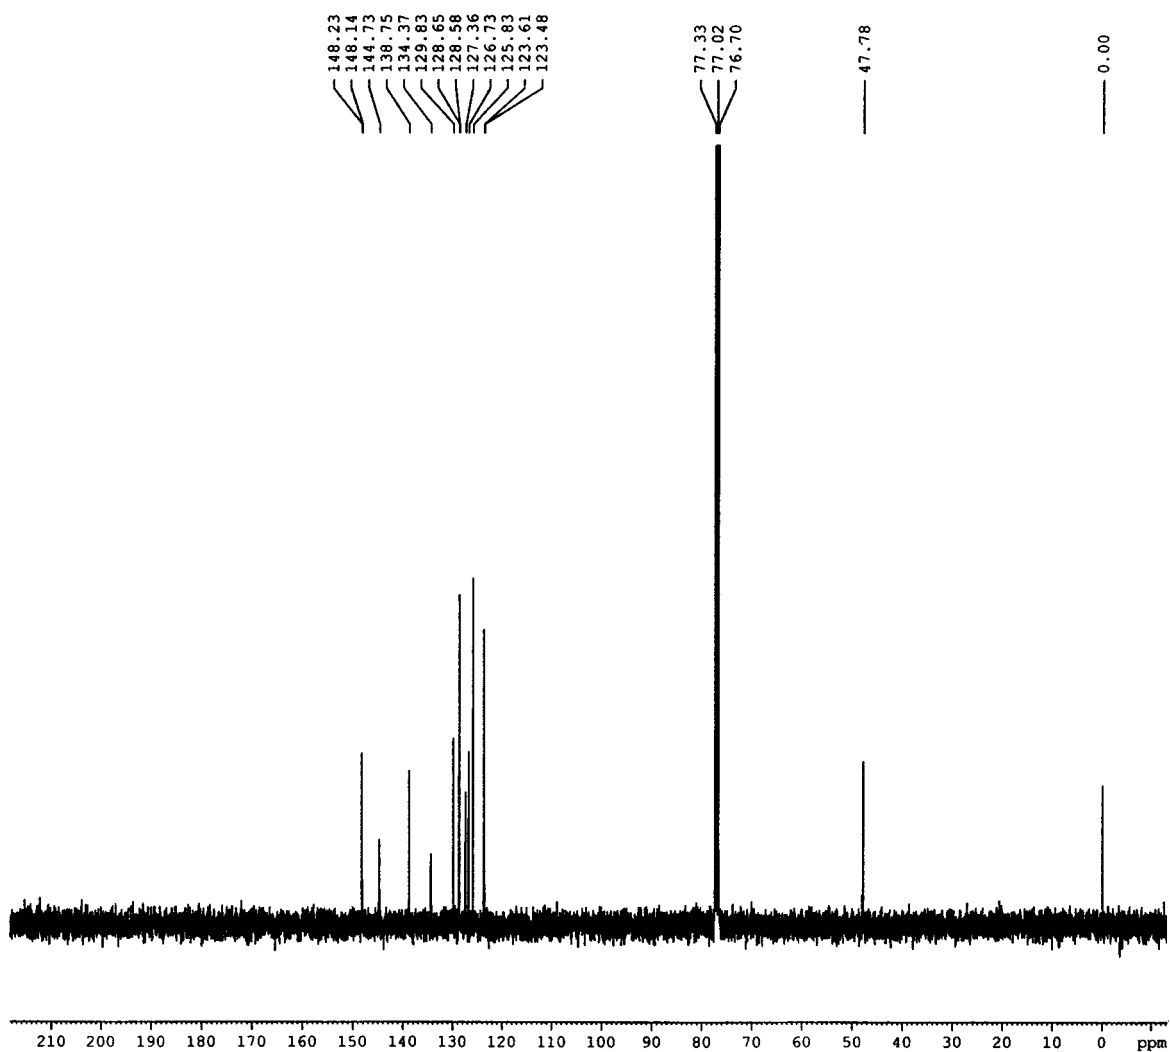

Figure S16:  $^{13}\text{C}$  NMR spectrum of **10a**.

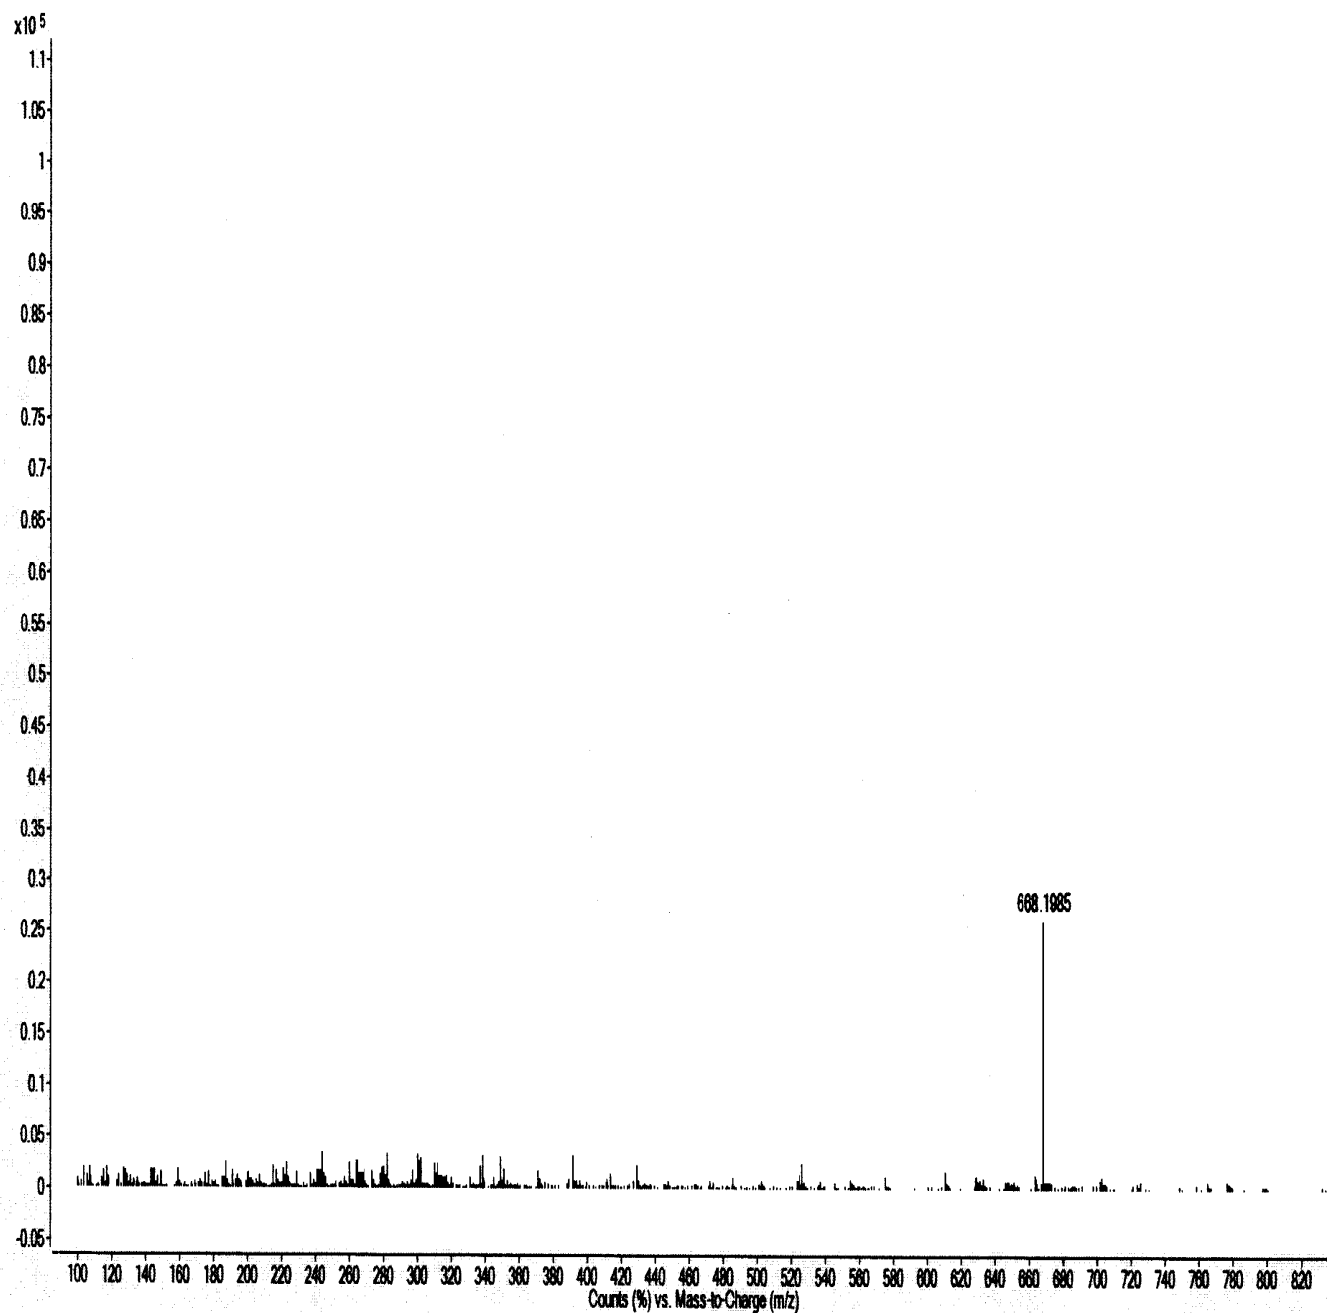

Figure S17: Mass spectrum of **10a**.

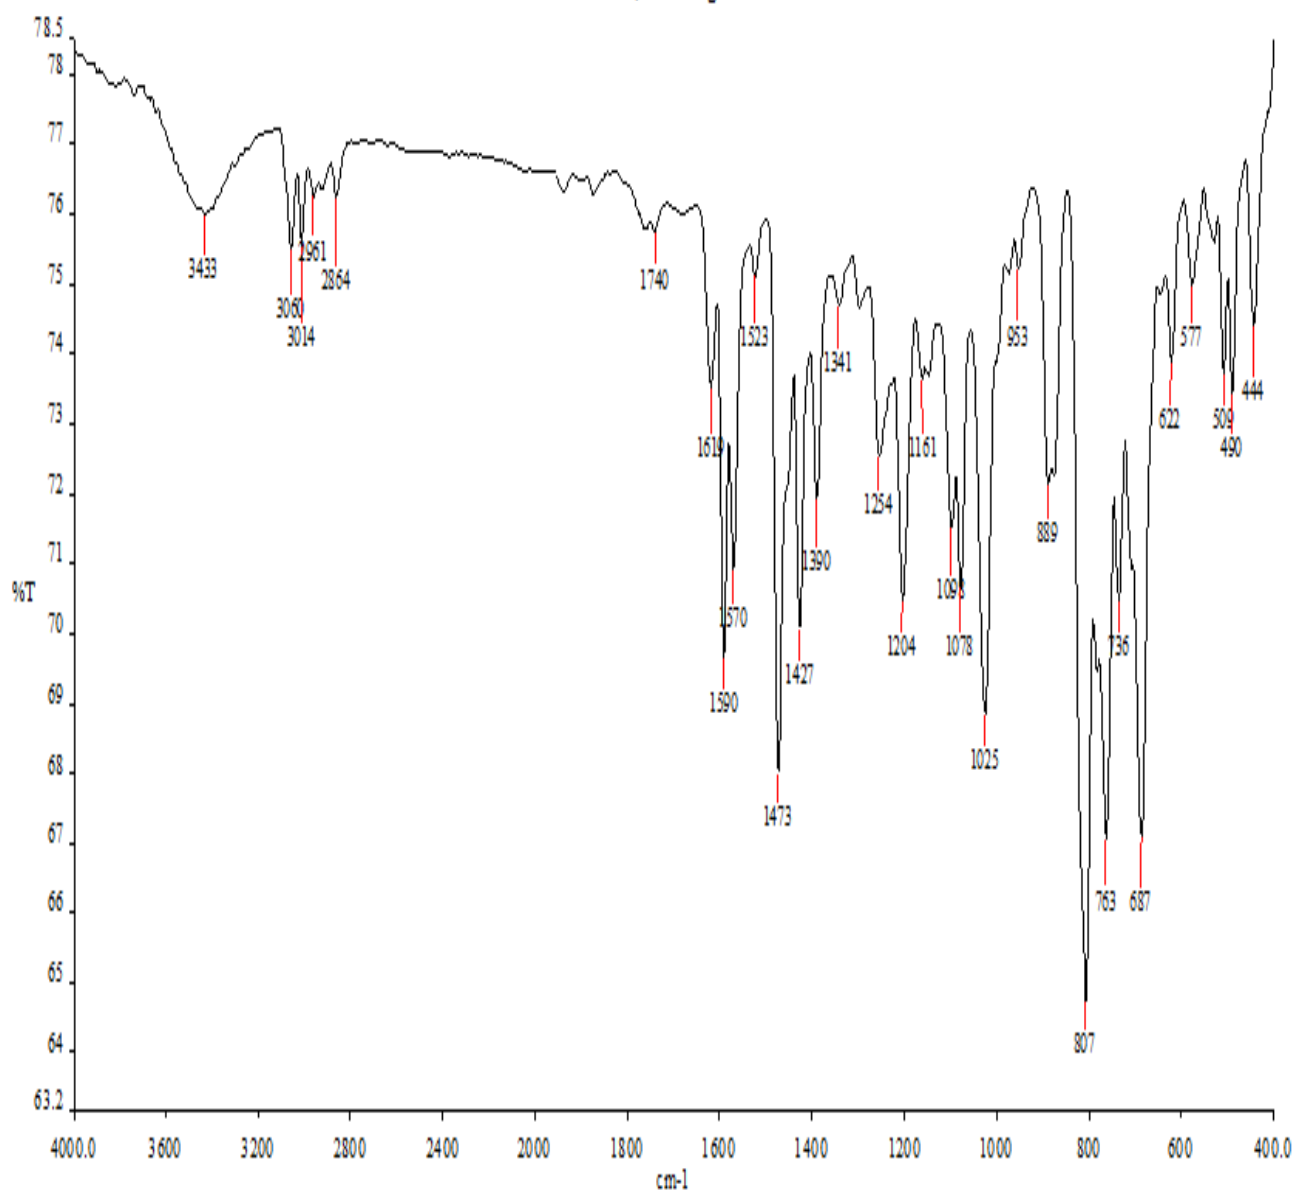

Figure S18: IR Spectrum of 10a.

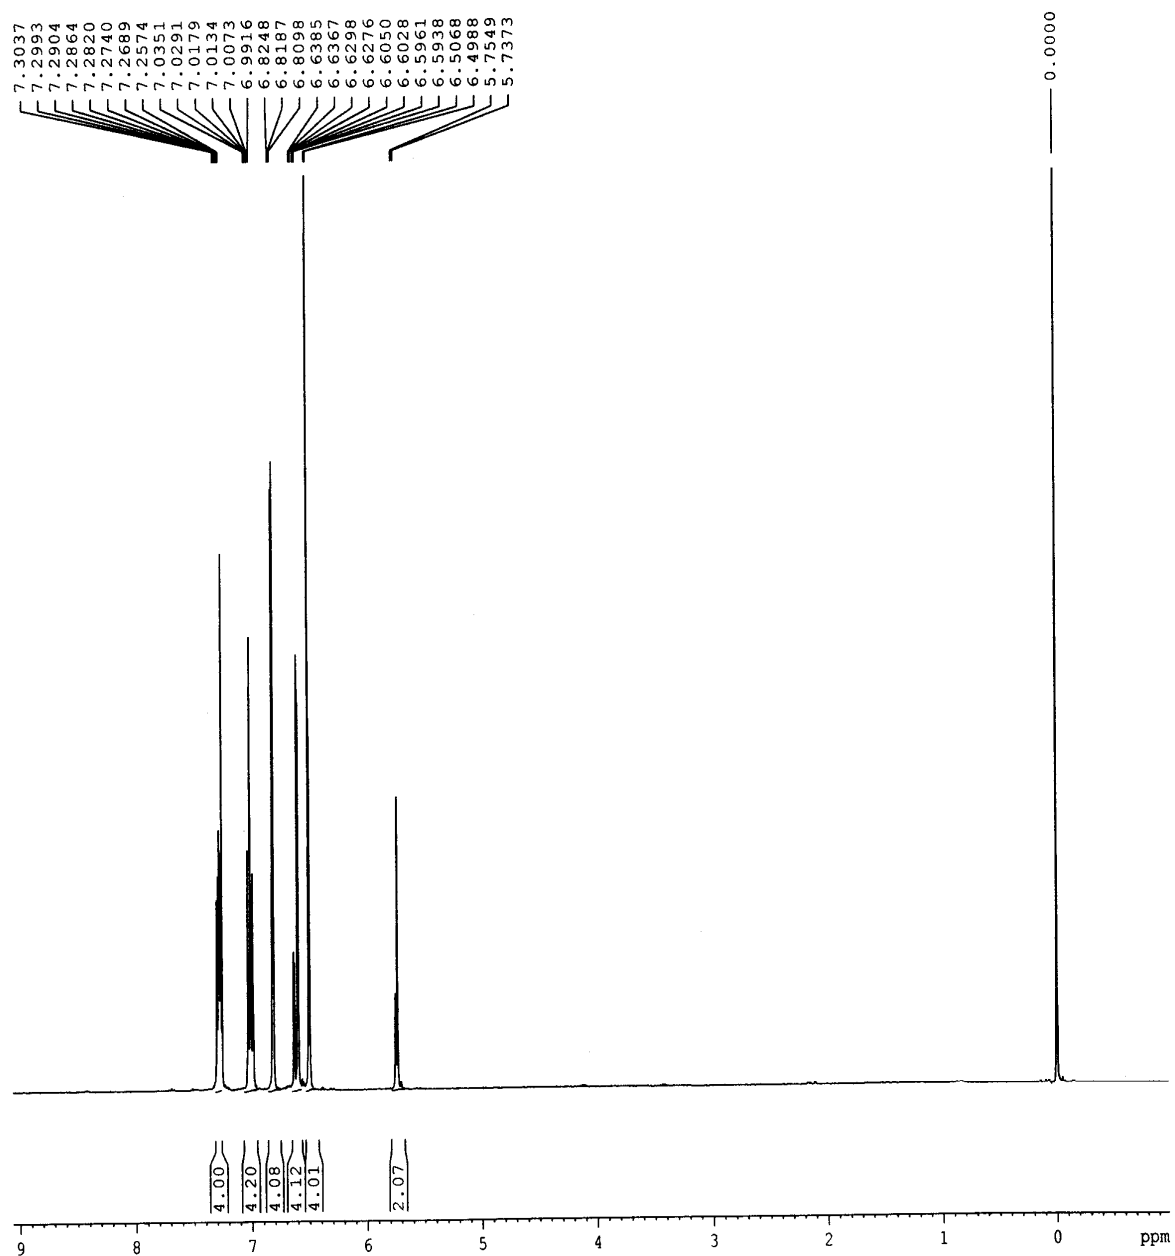

Figure S19:  $^1\text{H}$  NMR Spectrum of **10b**.



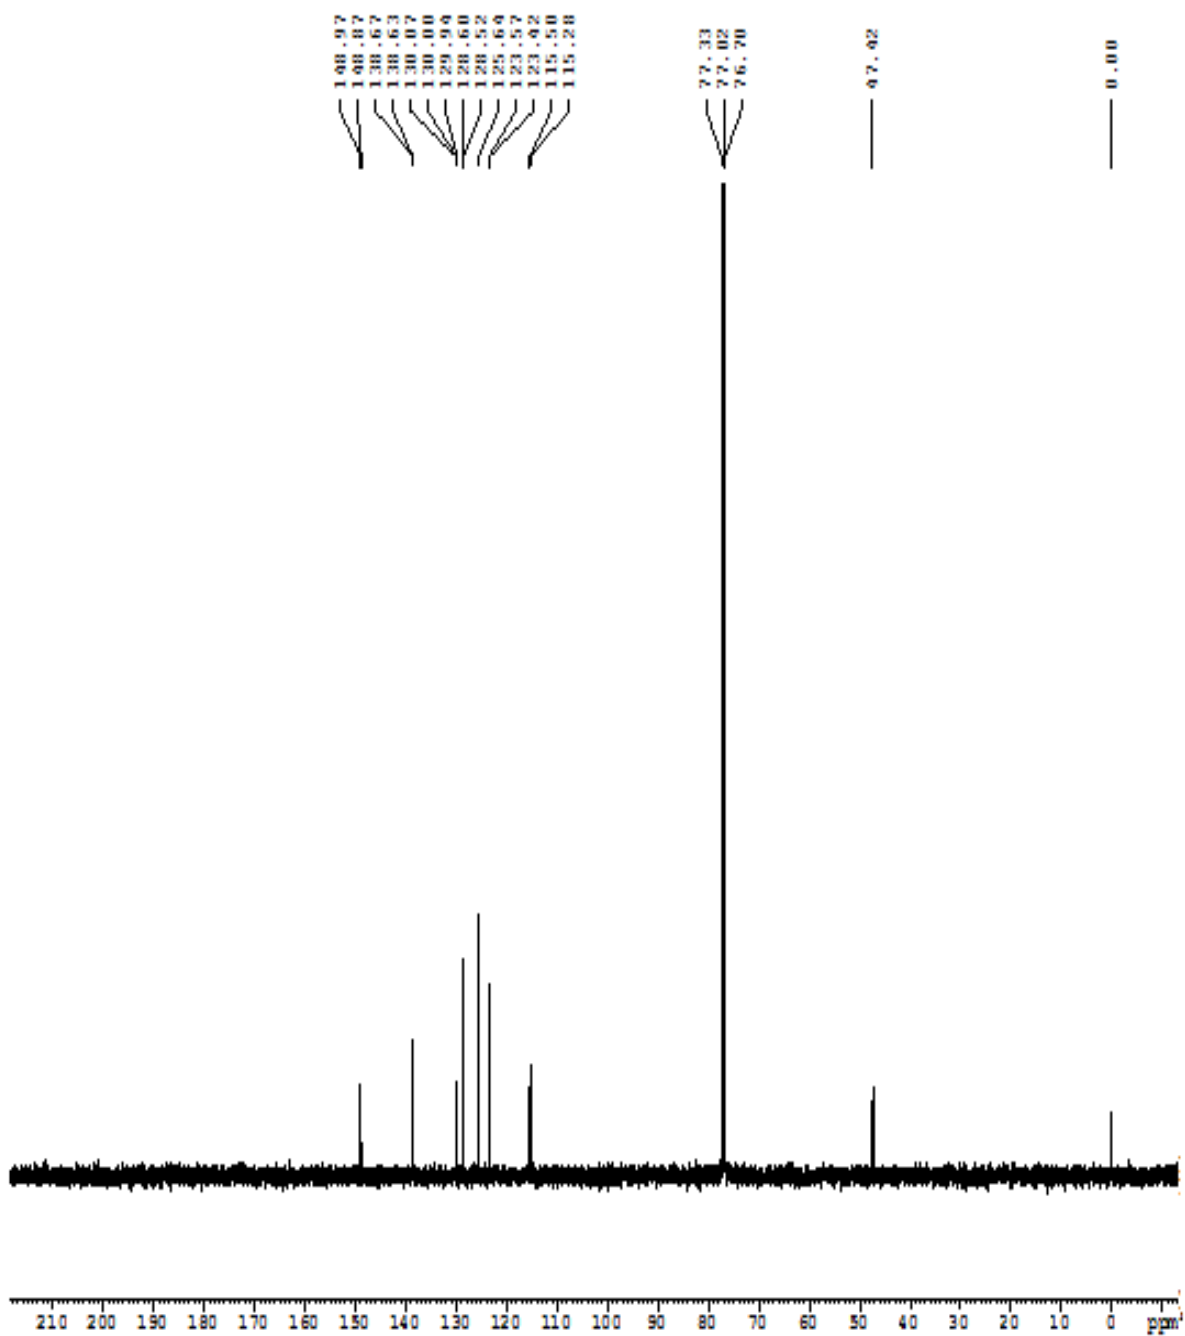

Figure S20:  $^{13}\text{C}$  NMR Spectrum of **10b**.

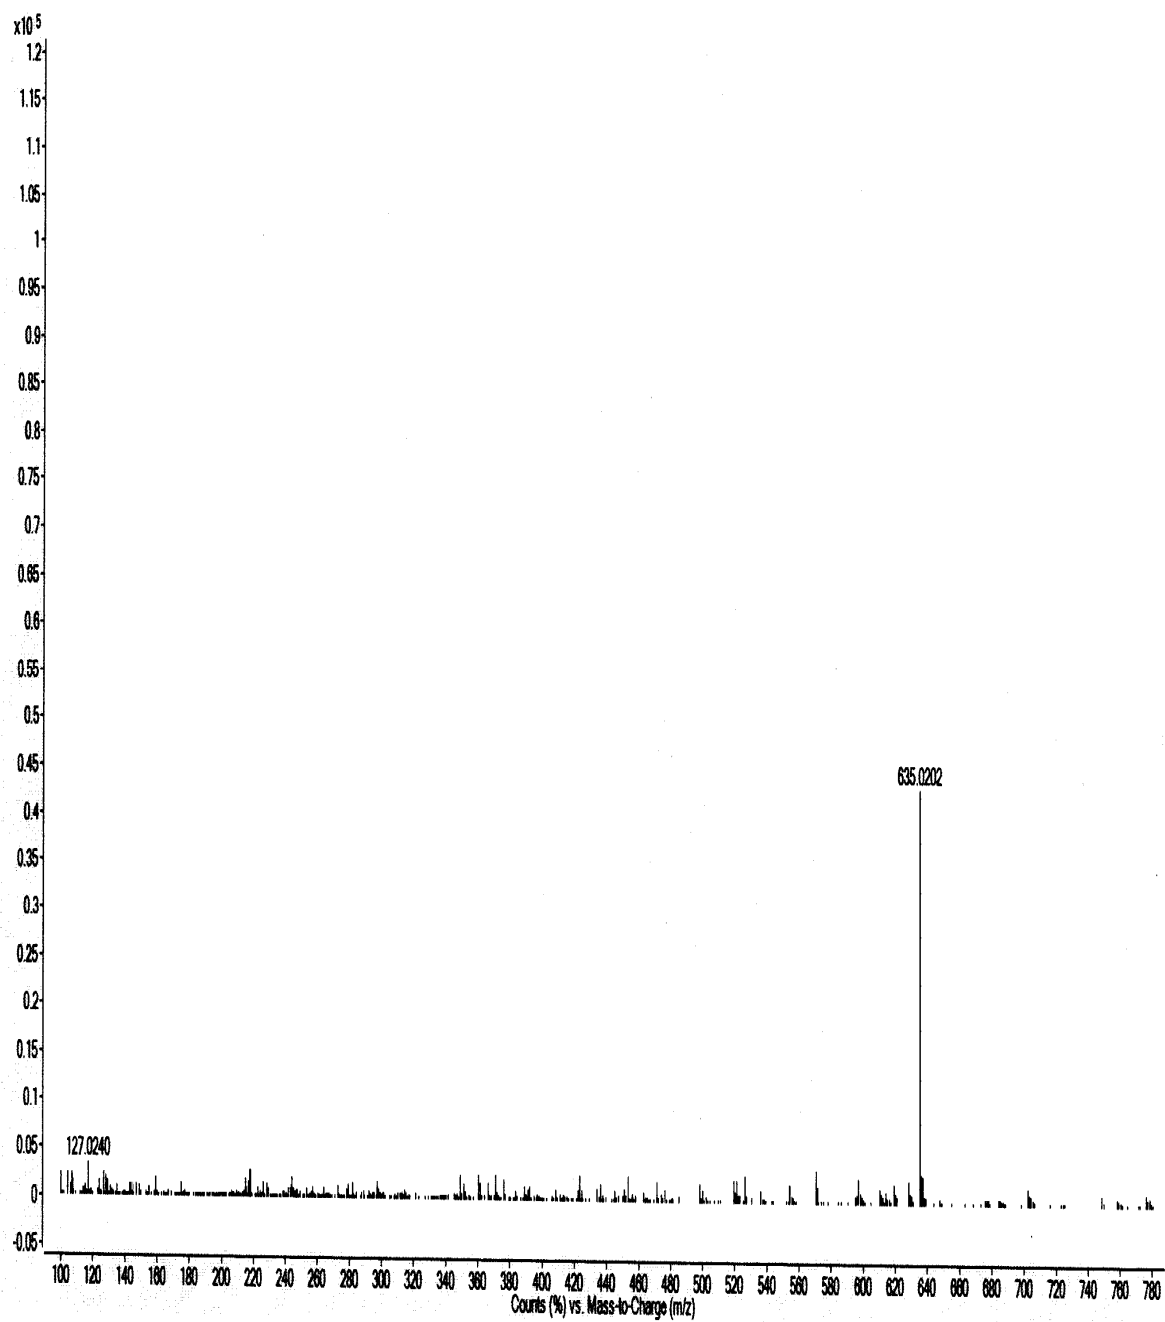

Figure S21: Mass spectrum of **10b**.

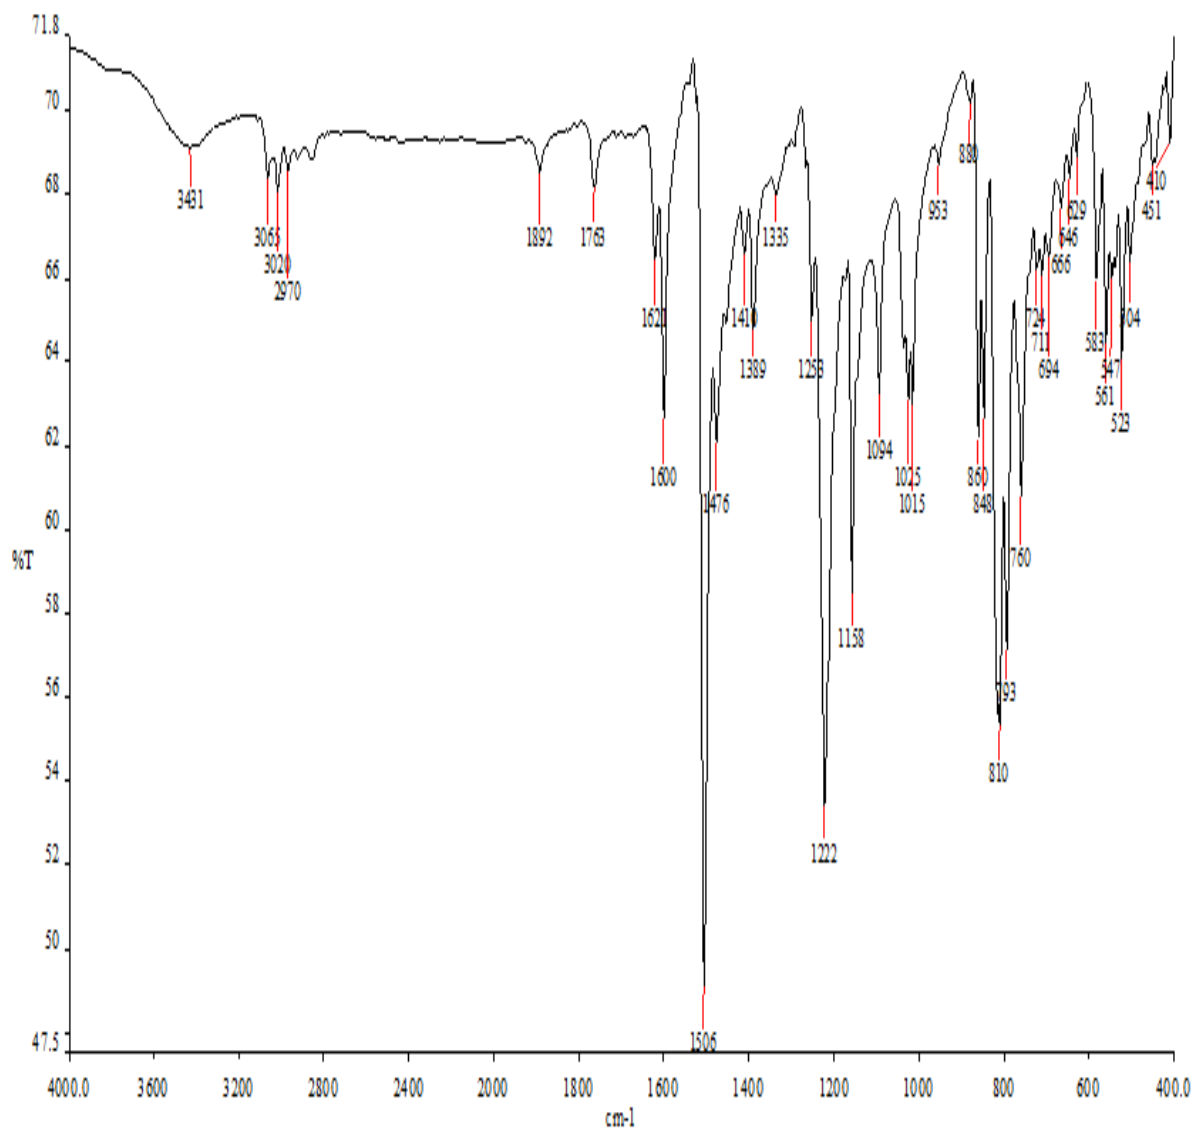

Figure S22: IR Spectrum of 10b.

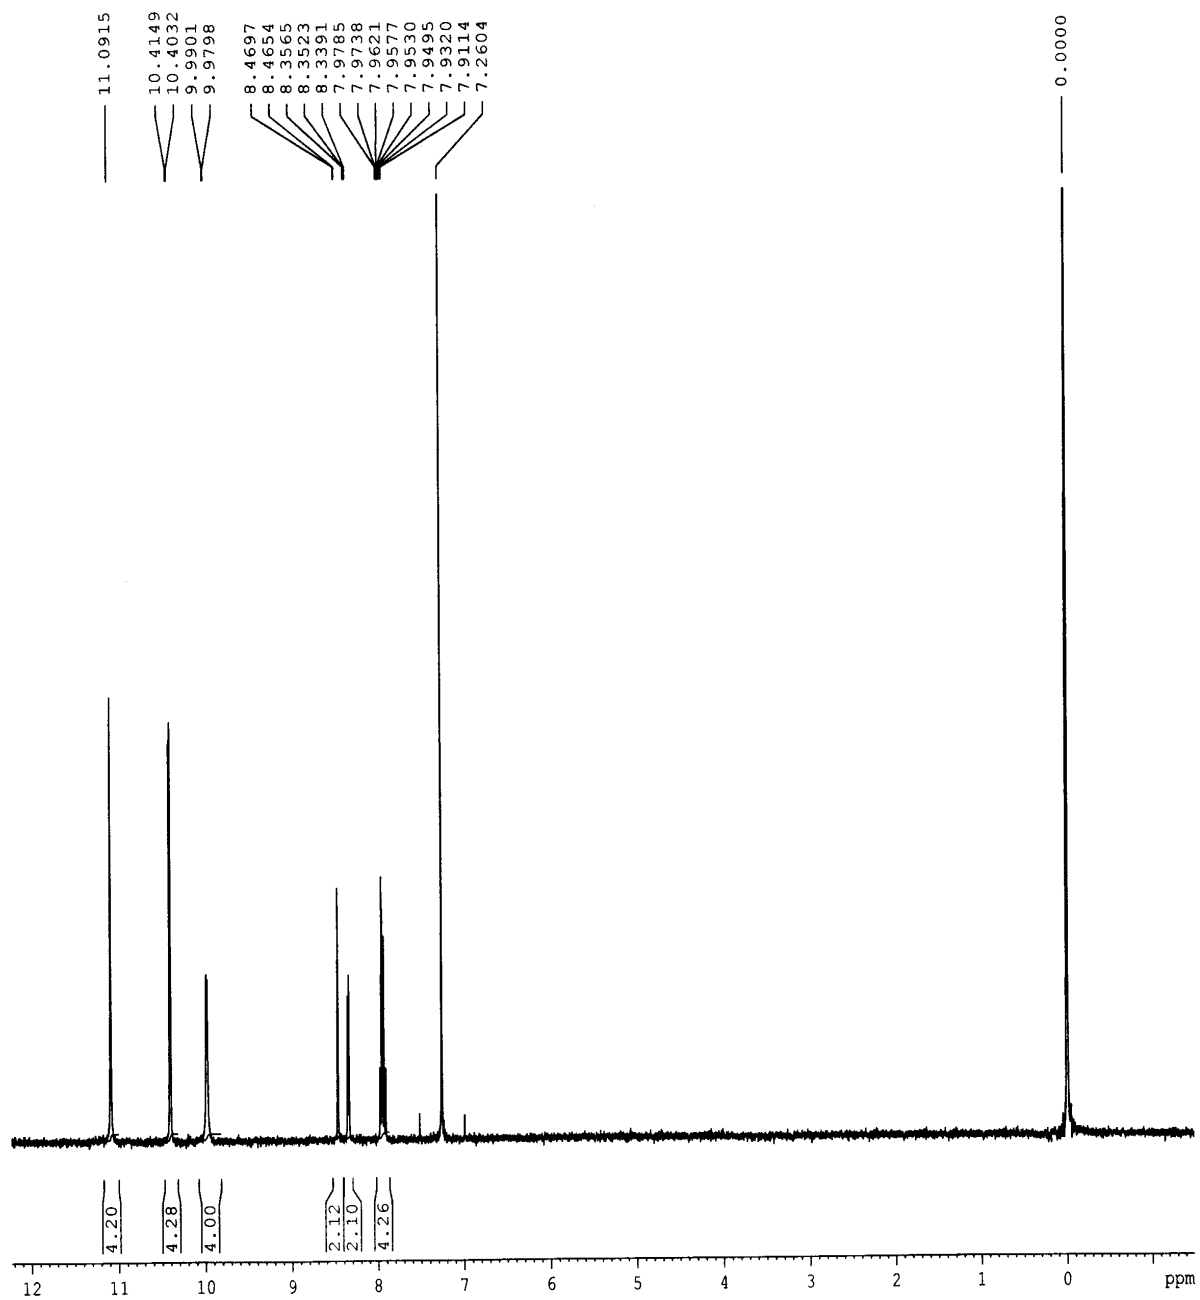

Figure S23:  $^1\text{H}$  NMR Spectrum of **11a**.

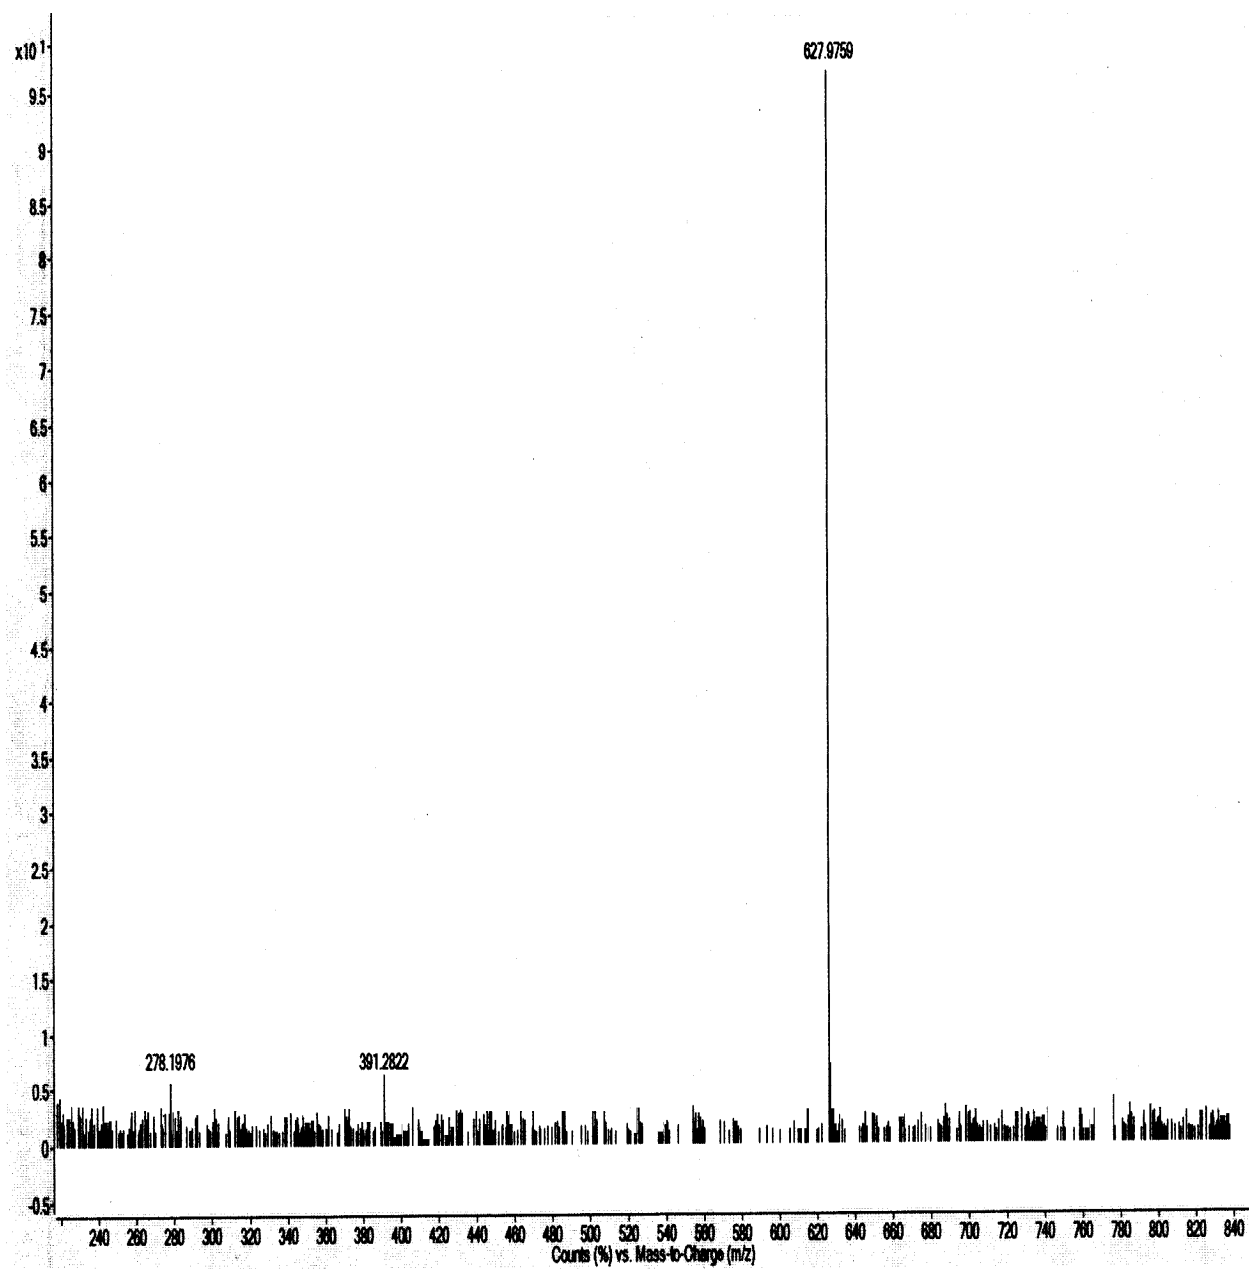

Figure S24: Mass spectrum of **11a**.

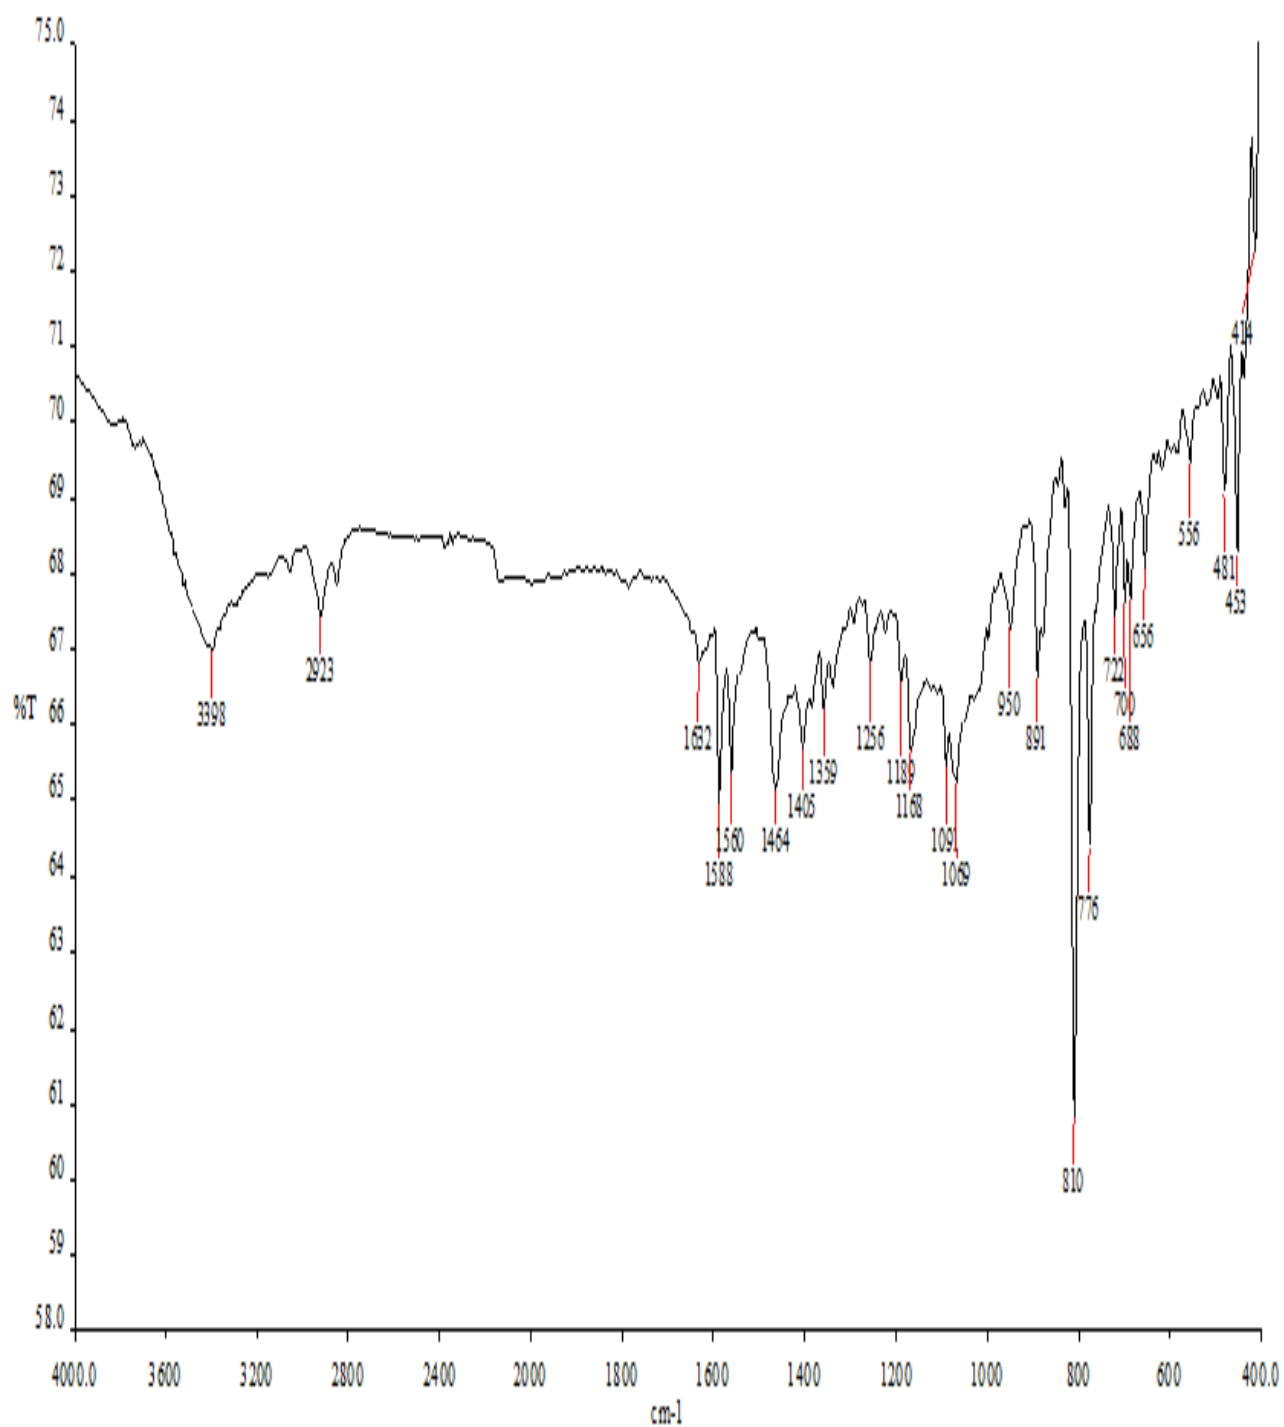

Figure S25: IR Spectrum of 11a.

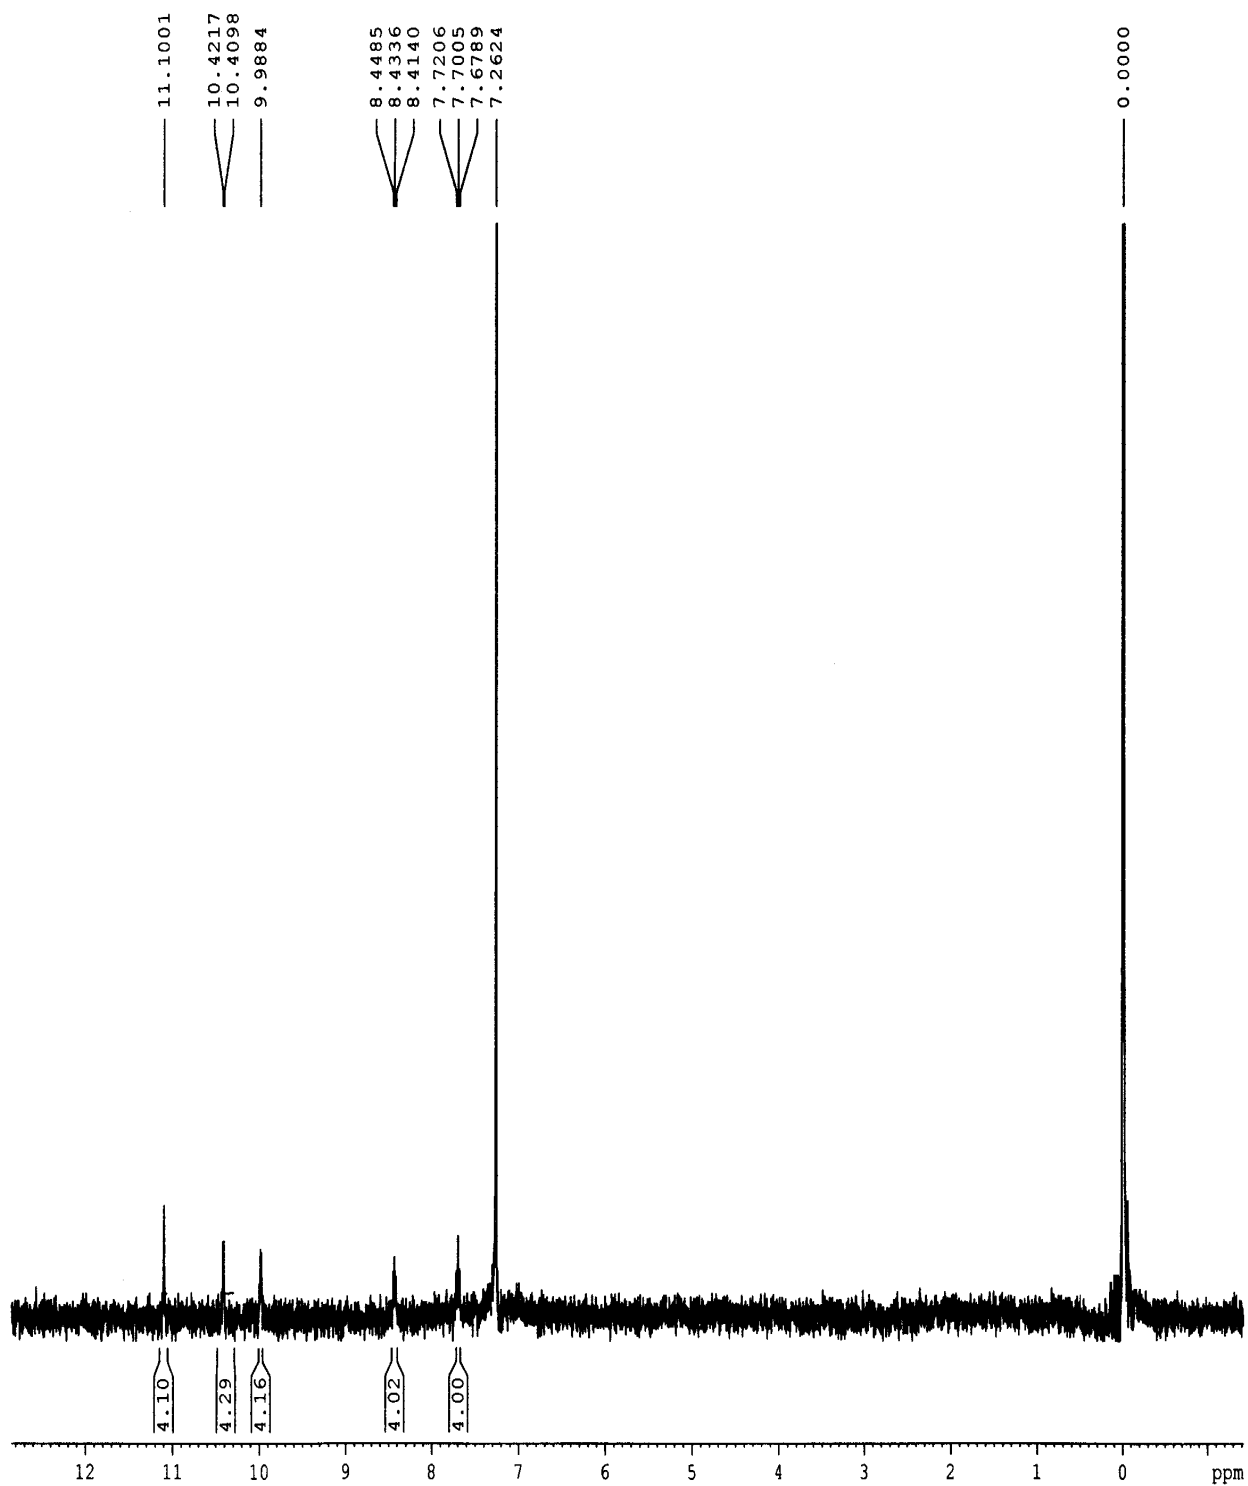

Figure S26:  $^1\text{H}$  NMR Spectrum of **11b**.

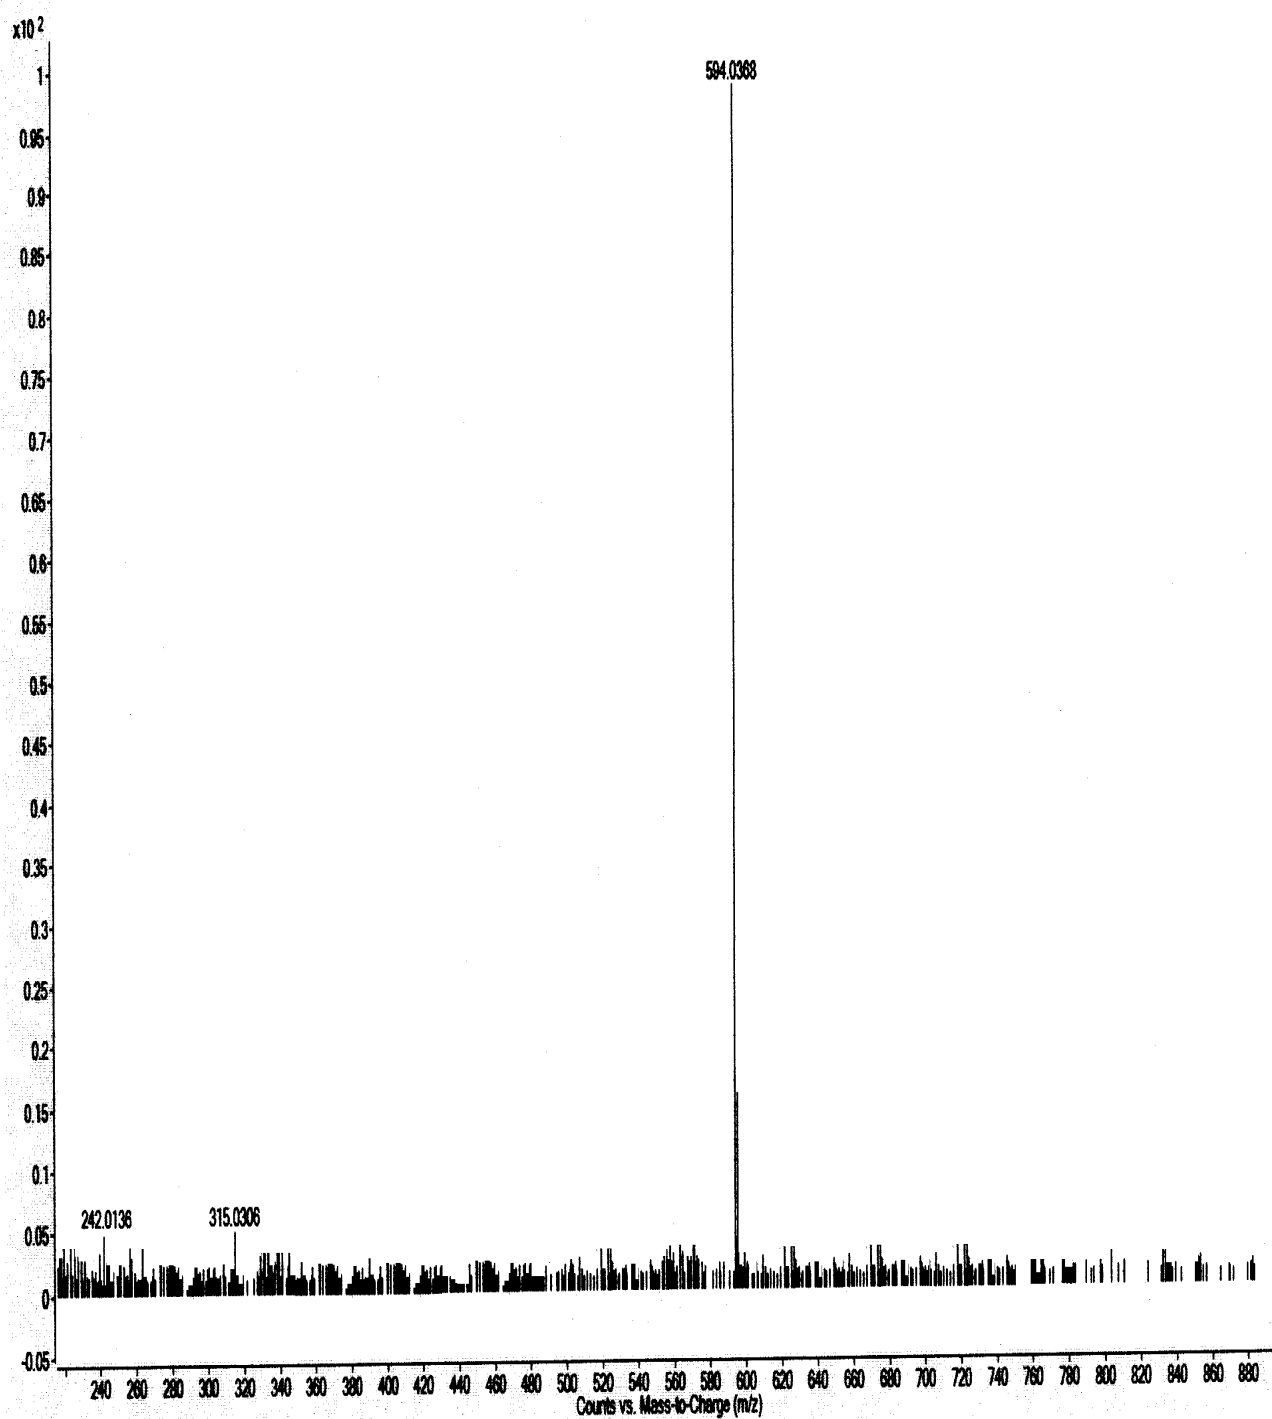

Figure S27: Mass spectrum of **11b**.



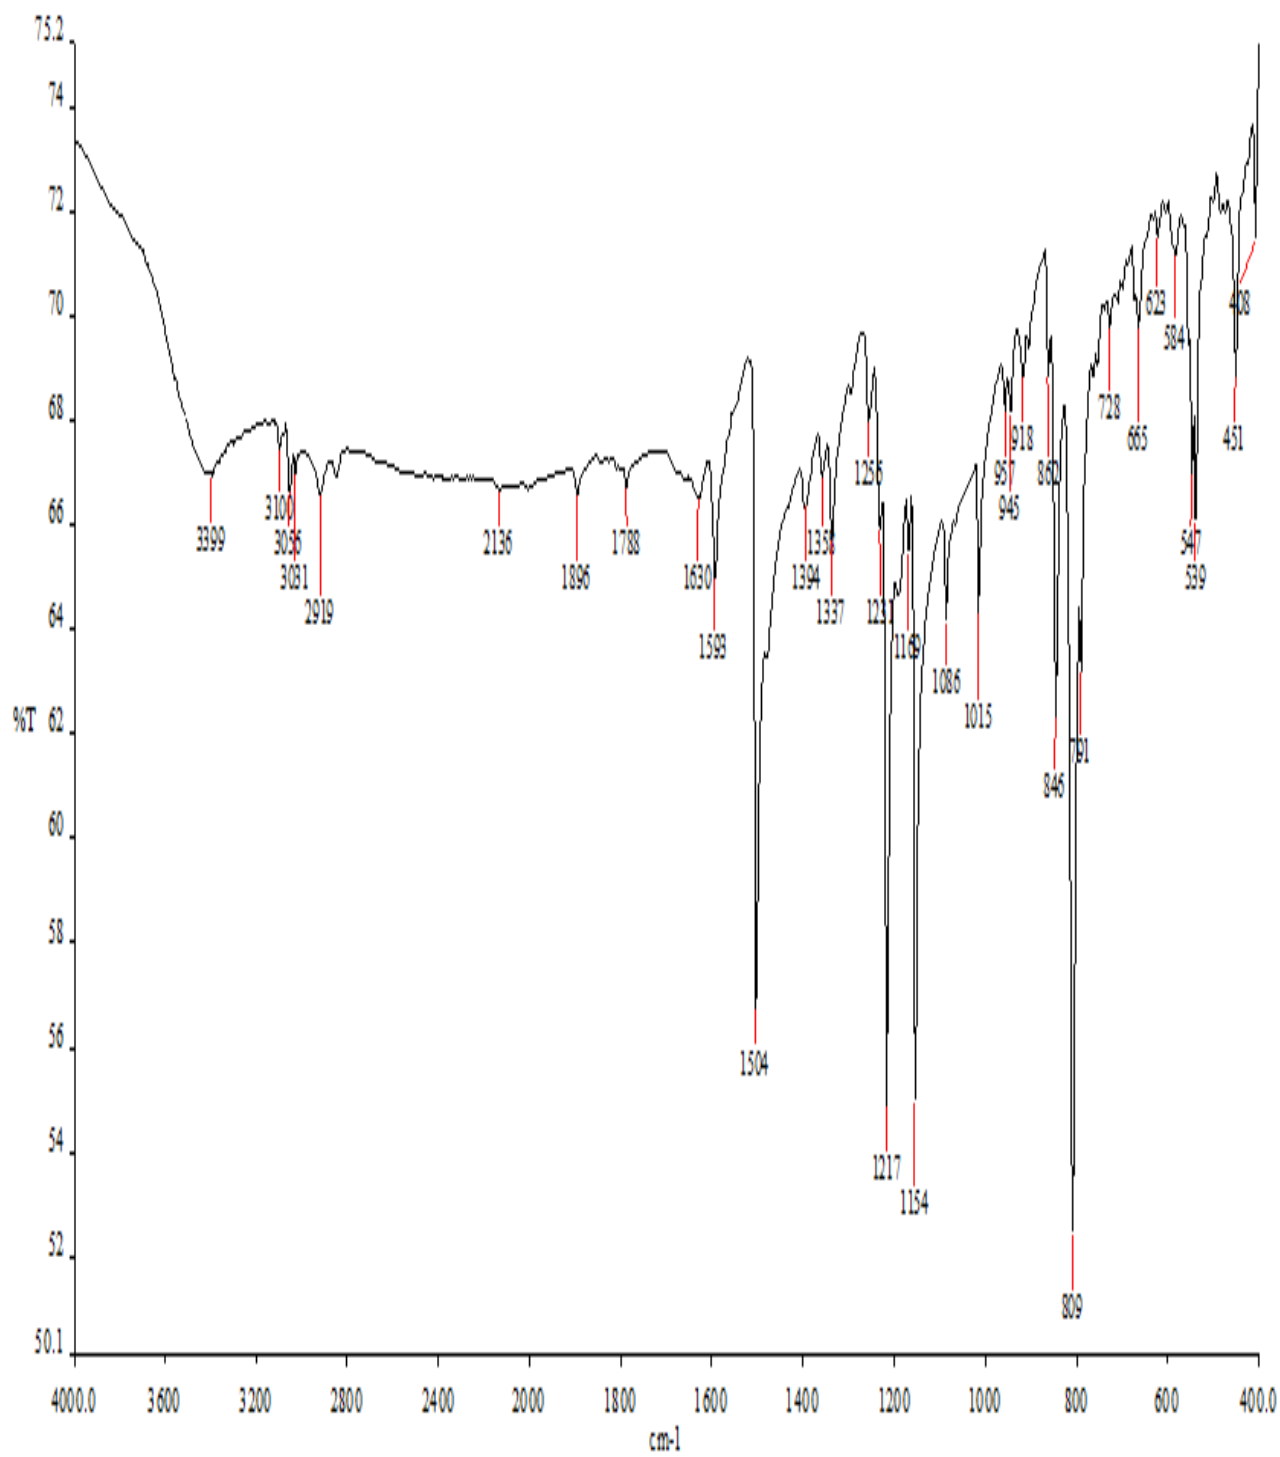

Figure S28: IR Spectrum of 11b.

## Theoretical Calculations

### Computational methods

All the calculations were performed at the density functional theory (DFT) level with the B3LYP functional, the gradient correction of the exchange functional by Becke and the correlation functional by Lee, Yang and Parr. The 6-311G(d) split valence plus polarization basis set was used in Gaussian 09 program.<sup>[1],[2]</sup> The results were analyzed and visualized on Gauss View 5.0.9.

---

[<sup>1</sup>] Gaussian 09, Revision B.01, Frisch, M. J.; Trucks, G. W.; Schlegel, H. B.; Scuseria, W. H. G. E.; Robb, M. A.; Cheeseman, J. R.; Scalmani, G.; Barone, V.; Mennucci, B.; Petersson, G. A.; Nakatsuji, H.; Caricato, M.; Li, X.; Hratchian, H. P.; Izmaylov, A. F.; Bloino, J.; Zheng, G.; Sonnenberg, J. L.; Hada, M.; Ehara, M.; Toyota, K.; Fukuda, R.; Hasegawa, J.; Ishida, M.; Nakajima, T.; Honda, Y.; Kitao, O.; Nakai, H.; Vreven, T.; Montgomery, J. A.; Peralta, Jr., J. E.; Ogliaro, F.; Bearpark, M.; Heyd, J. J.; Brothers, E.; Kudin, K. N.; Staroverov, V. N.; Keith, T.; Kobayashi, R.; Normand, J.; Raghavachari, K.; Rendell, A.; Burant, J. C.; Iyengar, S. S.; Tomasi, J.; Cossi, M.; Rega, N.; Millam, J. M.; Klene, M.; Knox, J. E.; Cross, J. B.; Bakken, V.; Adamo, C.; Jaramillo, J.; Gomperts, R.; Stratmann, R. E.; Yazyev, O.; Austin, A. J.; Cammi, R.; Pomelli, C.; Ochterski, J. W.; Martin, R. L.; Morokuma, K.; Zakrzewski, V. G.; Voth, G. A.; Salvador, P.; Dannenberg, J. J.; Dapprich, S.; Daniels, A. D.; Farkas, O.; Foresman, J. B.; Ortiz, J. V.; Cioslowski, J.; Fox, D. J. Gaussian, Inc., Wallingford CT, 2010.

[<sup>2</sup>] Details including the references for the DFT method and basis set can be found online at the homepage of Gaussian, Inc.; <http://www.gaussian.com/>

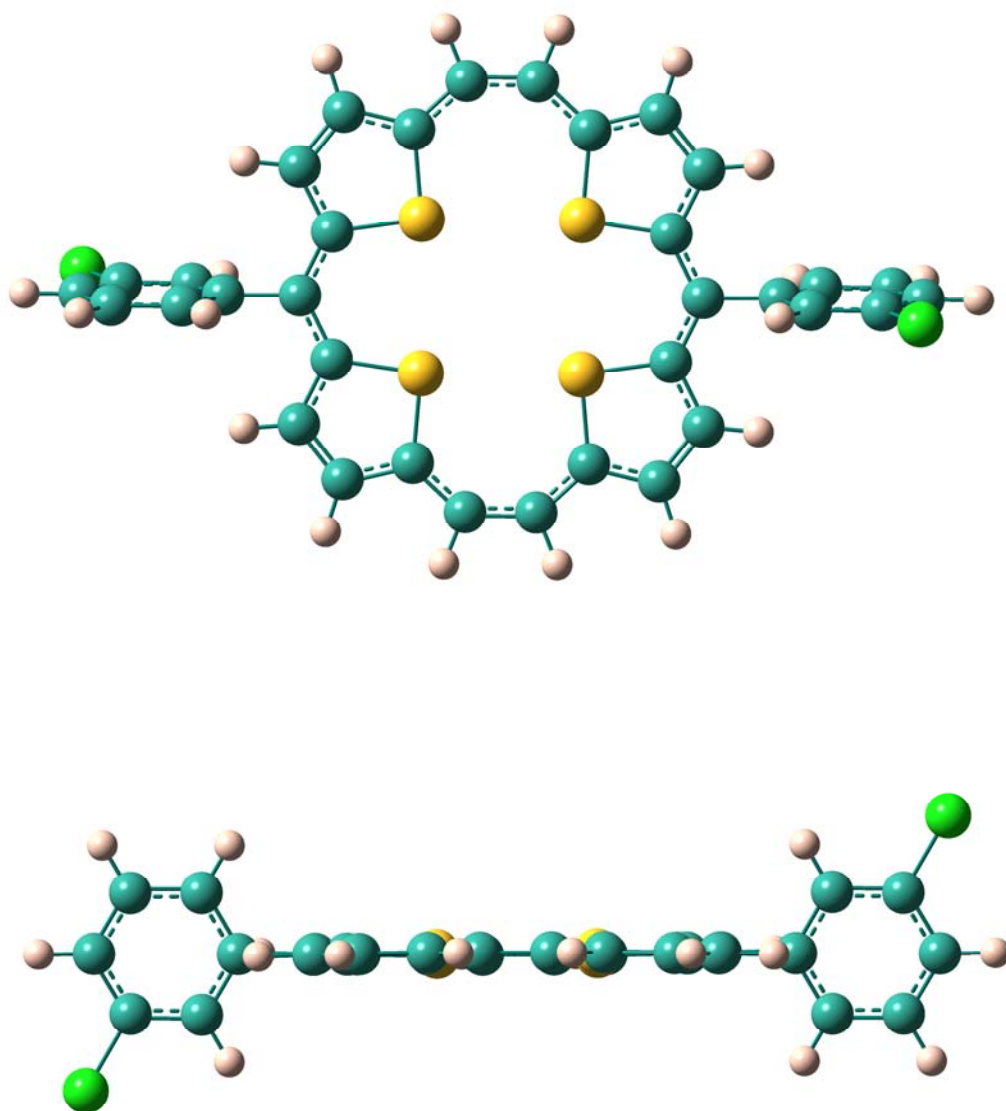

**Figure S29:** Energy minimized structure of **11a** by DFT method at B3LYP/6-311G(d) level using the Gaussian09 program (Top and side views shown above).

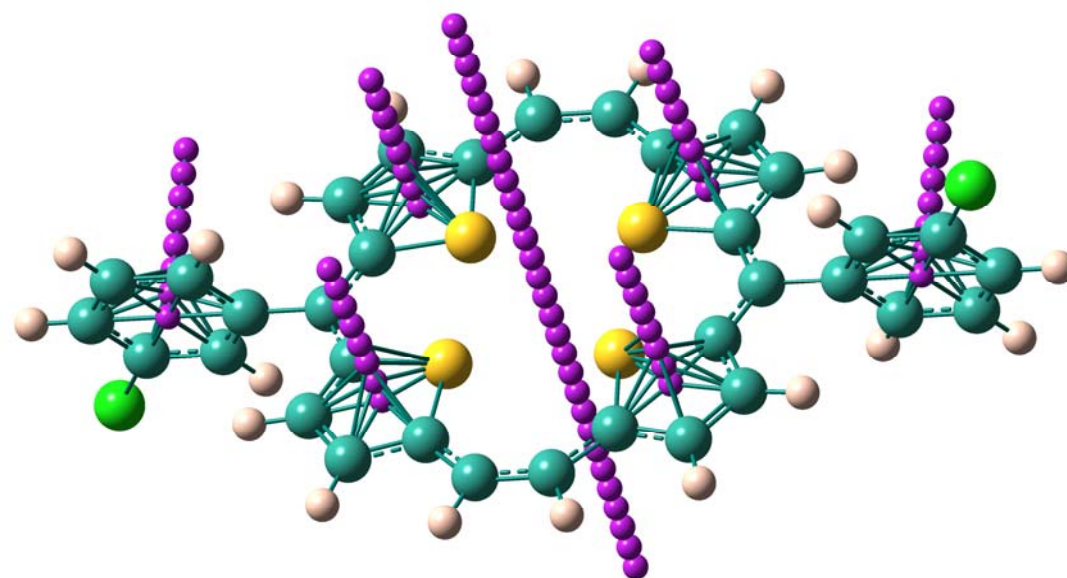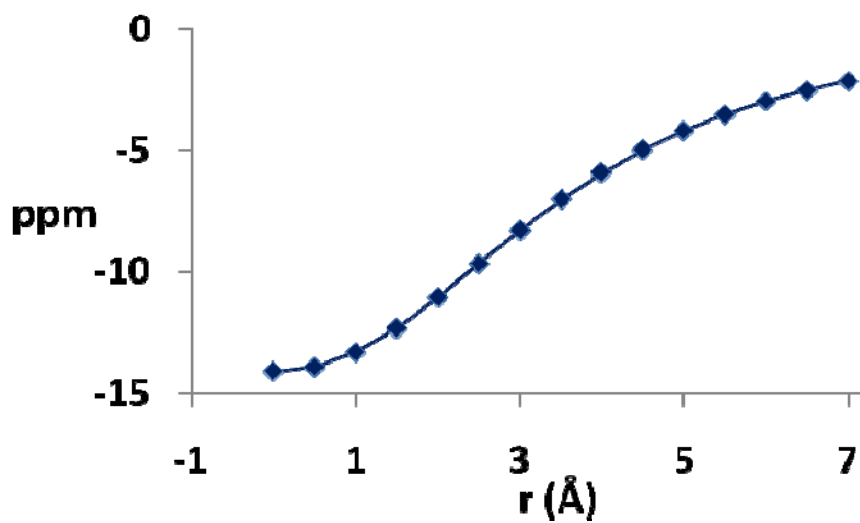

**Figure S30:** The ghost (Bq) atoms (in purple) were placed (0.5 Å interval) in the centre of the molecule. The -ve NICS values clearly indicate the aromaticity of **11a**. NICS is maximum at 0 Å and decreases as the distance of the ghost atom is increased in 0.5 Å intervals.

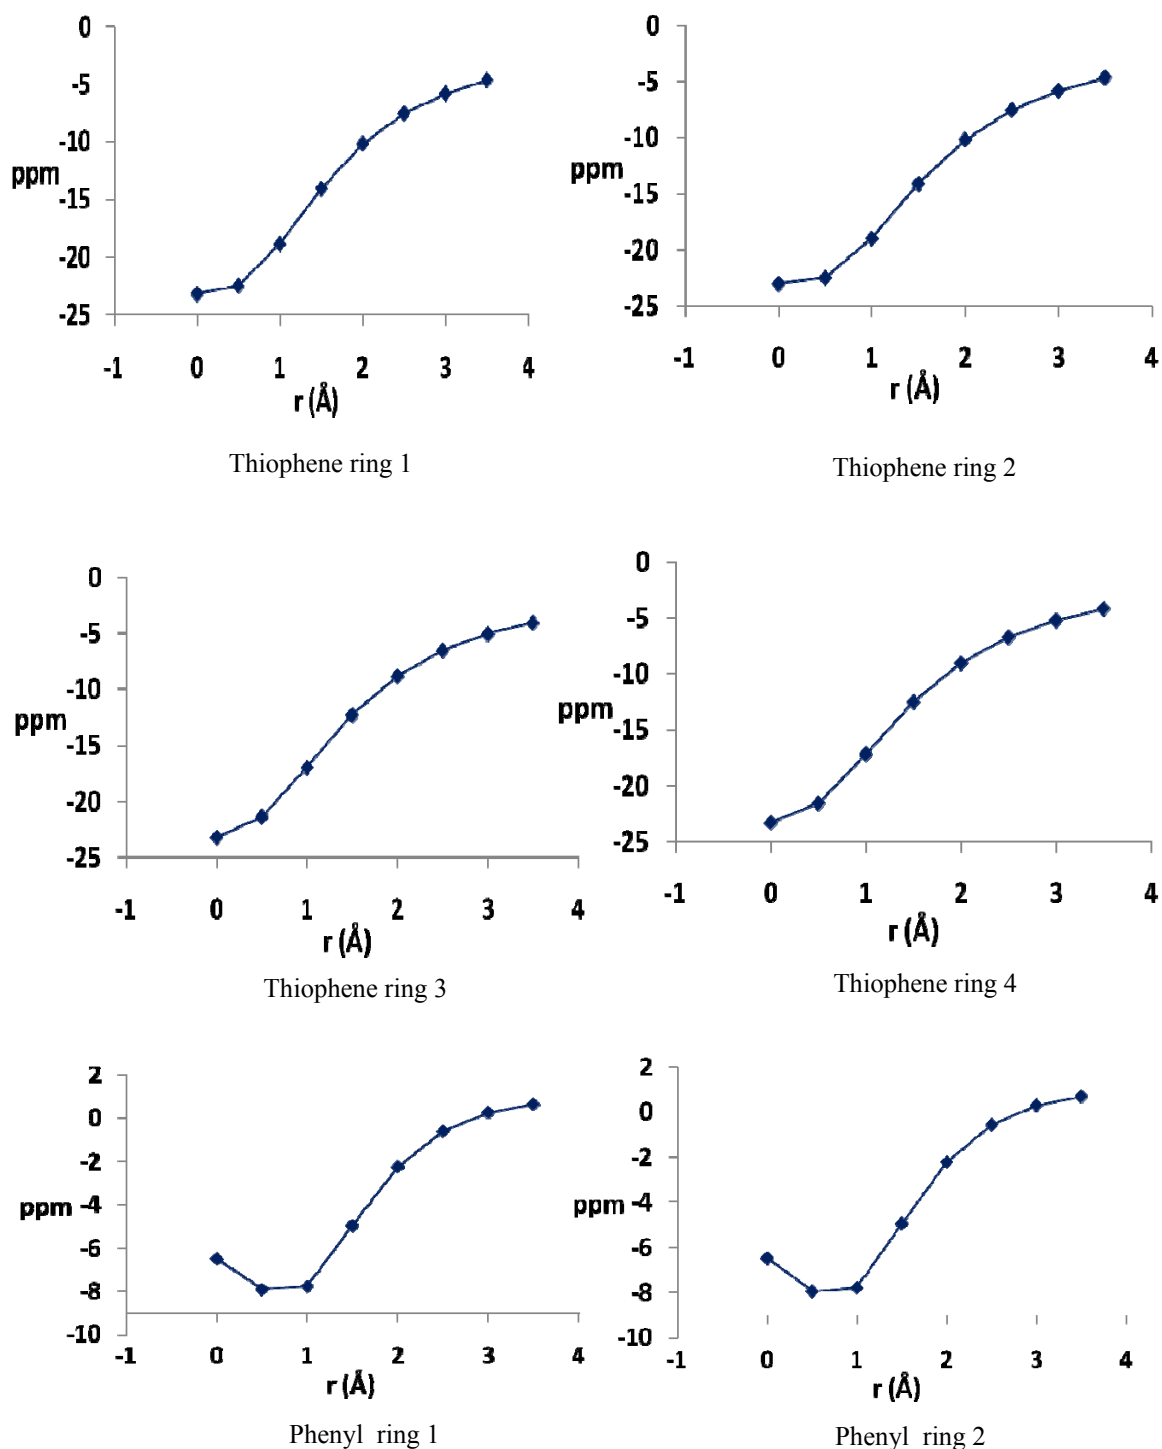

**Figure S31:** As shown above is the behaviour of the four thiophene rings of **11a**. The NICS are negative and maximum at their centres and decreases as we move farther. Further the NICS at the centre is far higher than the normal thiophene showing their increased aromatic character when they are part of the annulene ring. Phenyl rings are showing the normal behavior like benzene but with decreased NICS values.

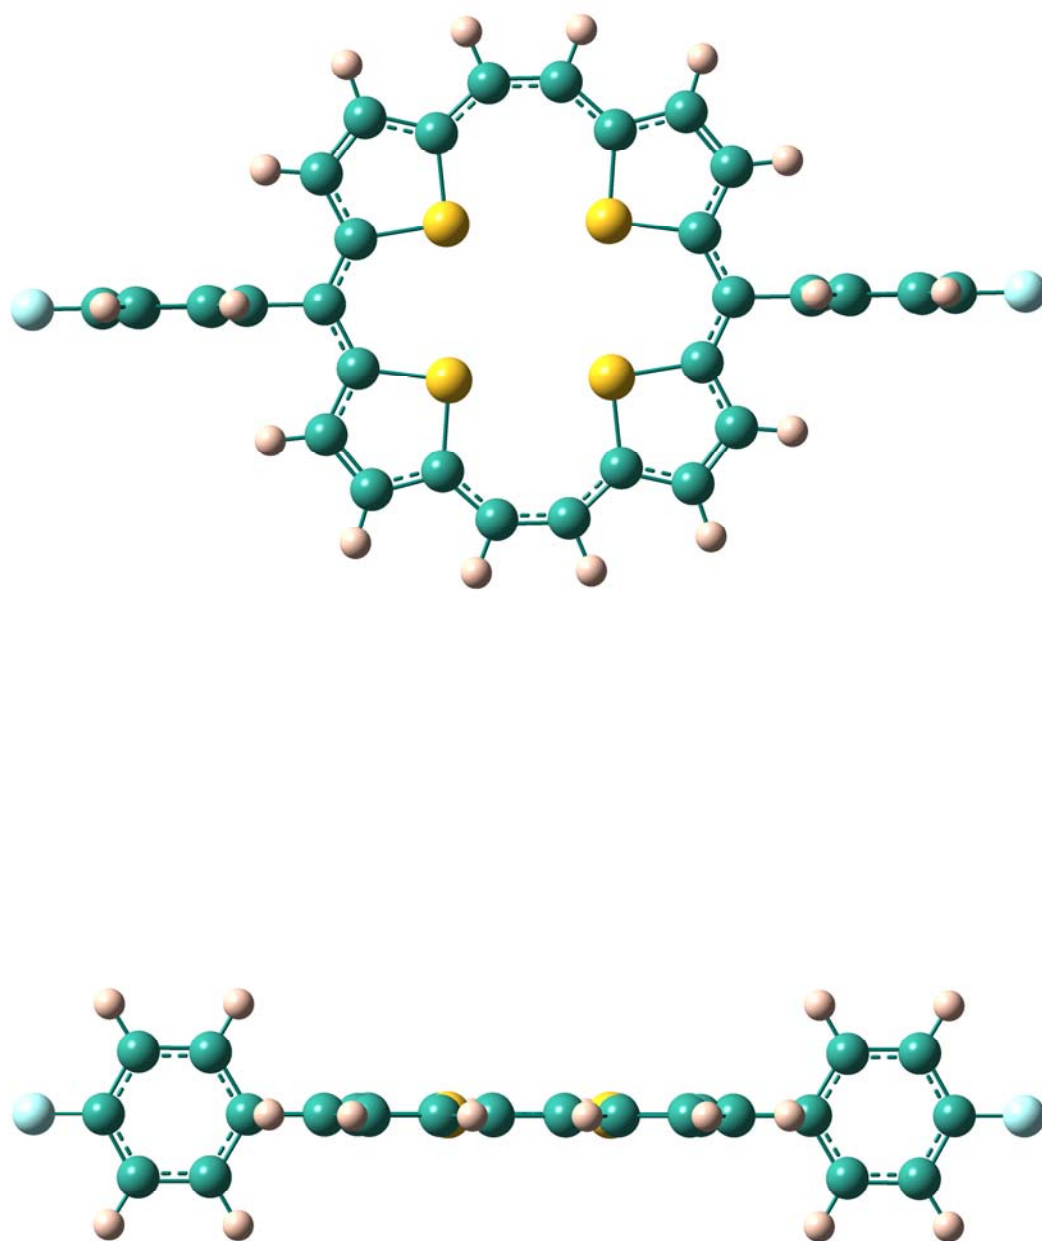

**Figure S32:** Energy minimized structure of **11b** by DFT method at B3LYP/6-311G(d) level using the Gaussian09 program (Top and side views shown above).

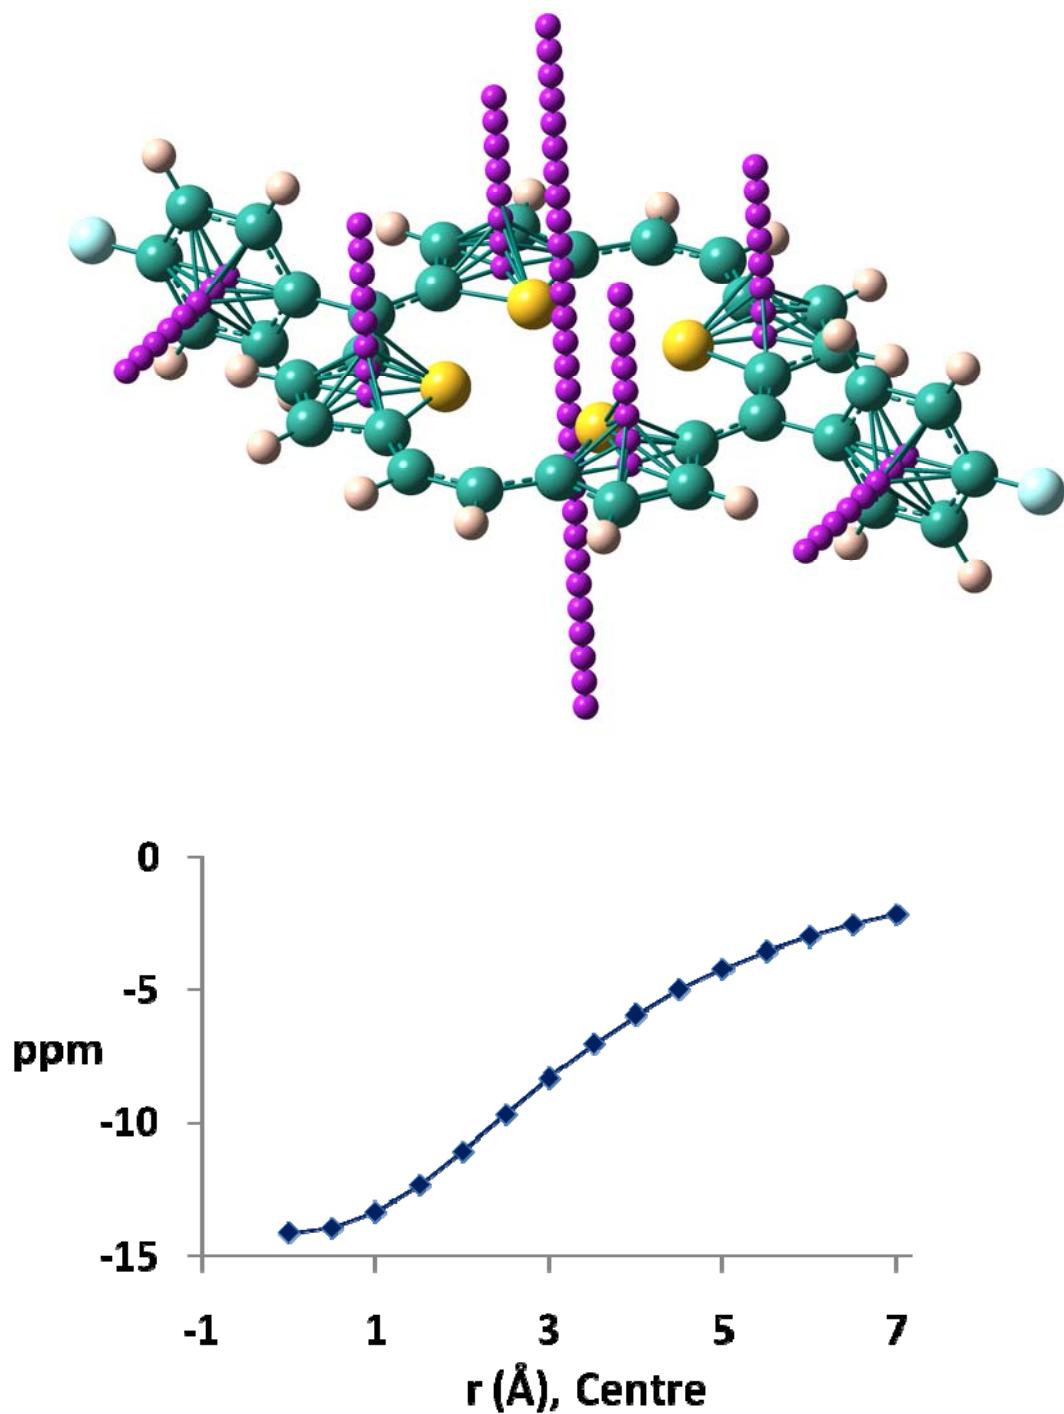

**Figure S33:** The ghost (Bq) atoms were placed (0.5 Å interval) in the centre of the molecule (in purple). The -ve NICS values clearly indicate the aromaticity of **11b**. NICS is maximum at 0 Å and decreases as the distance of the ghost atom is increased in 0.5 Å intervals.

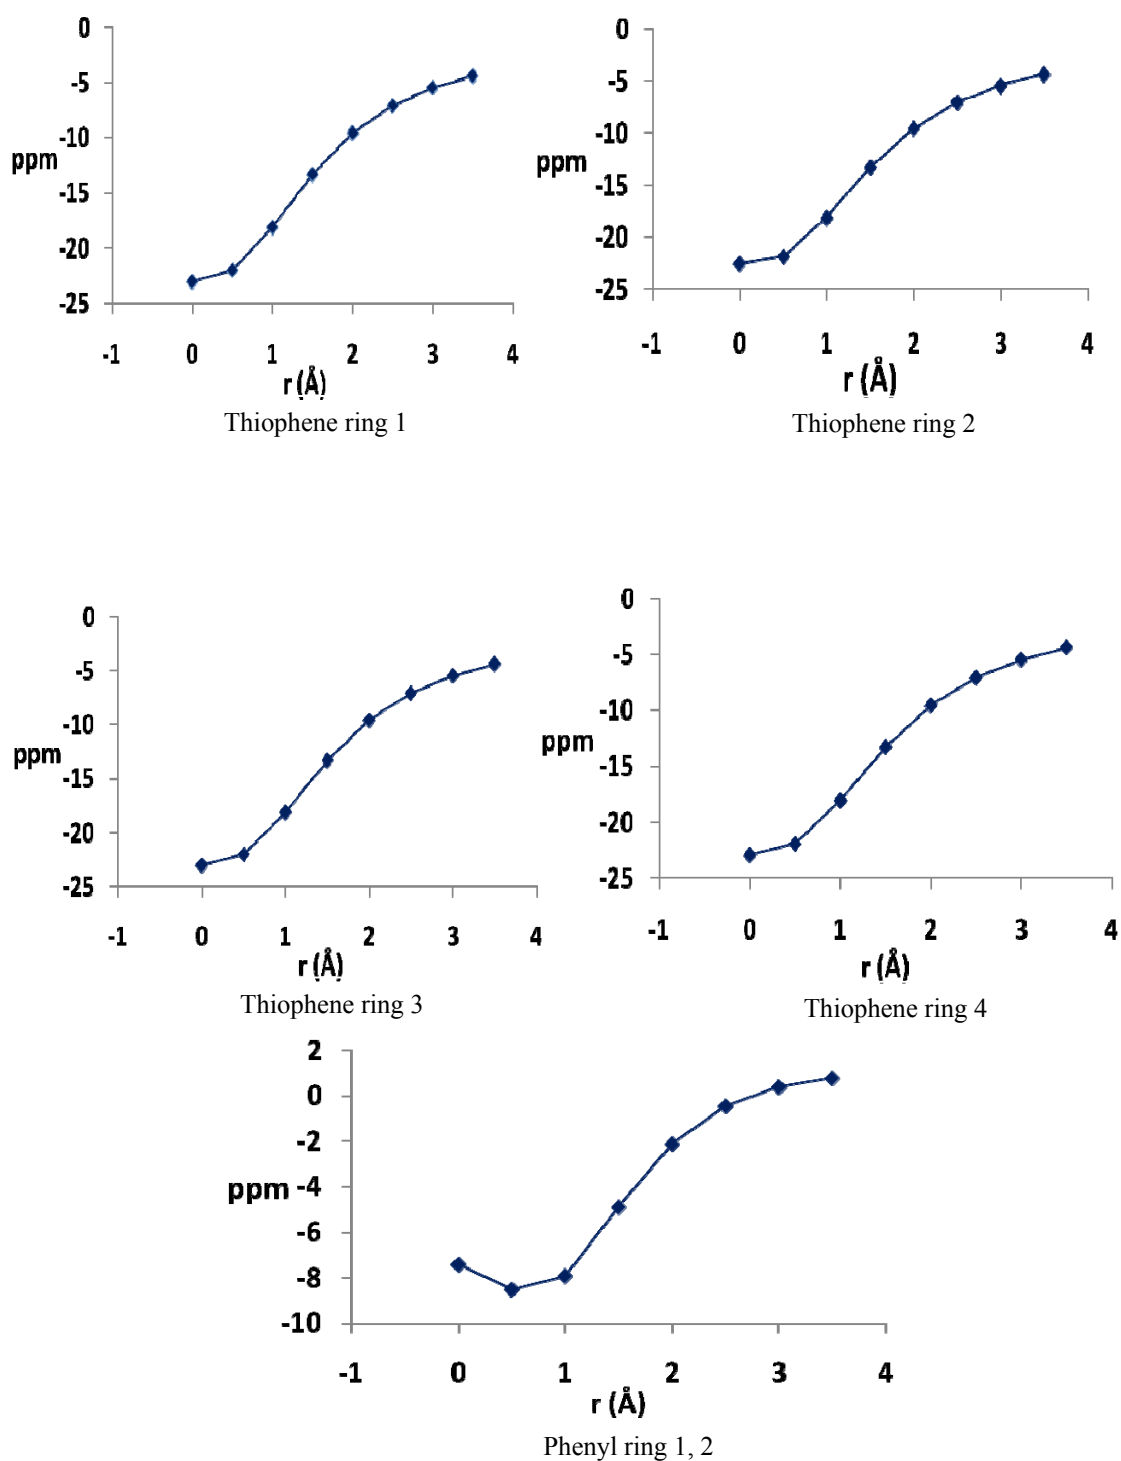

**Figure S34:** As shown above is the behaviour of the four thiophene rings of **11b**. The NICS are negative and maximum at their centres and decreases as we move farther. Further the NICS at the centre is far higher than the normal thiophene showing their increased aromatic character when they are part of the annulene ring. Phenyl rings are showing the normal behavior like benzene but with decreased NICS values.



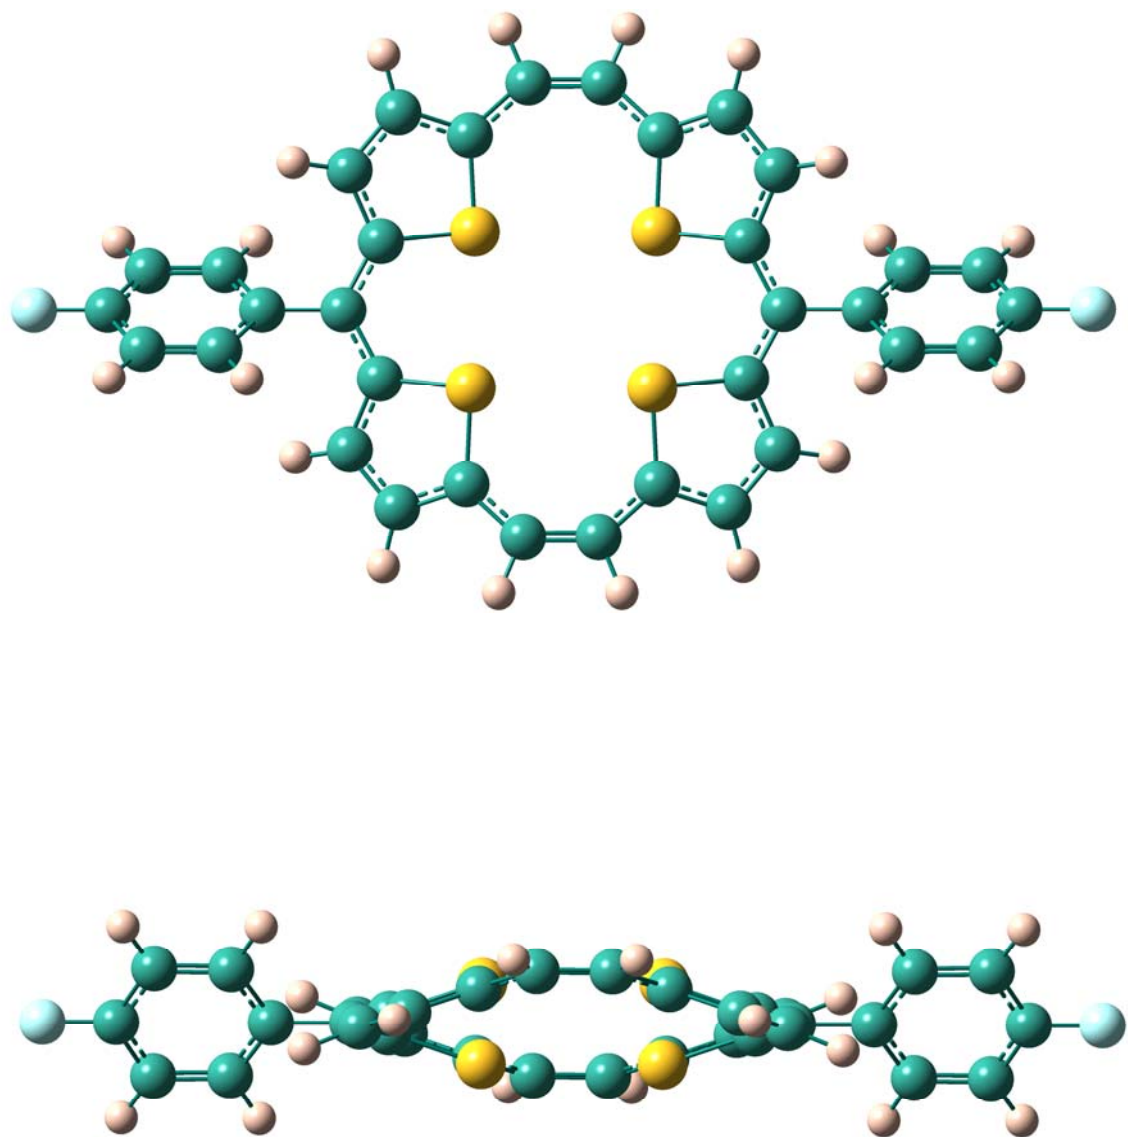

**Figure S35:** Energy minimized structure of antiaromatic dication **12b**. Upper (top view), lower (side view).

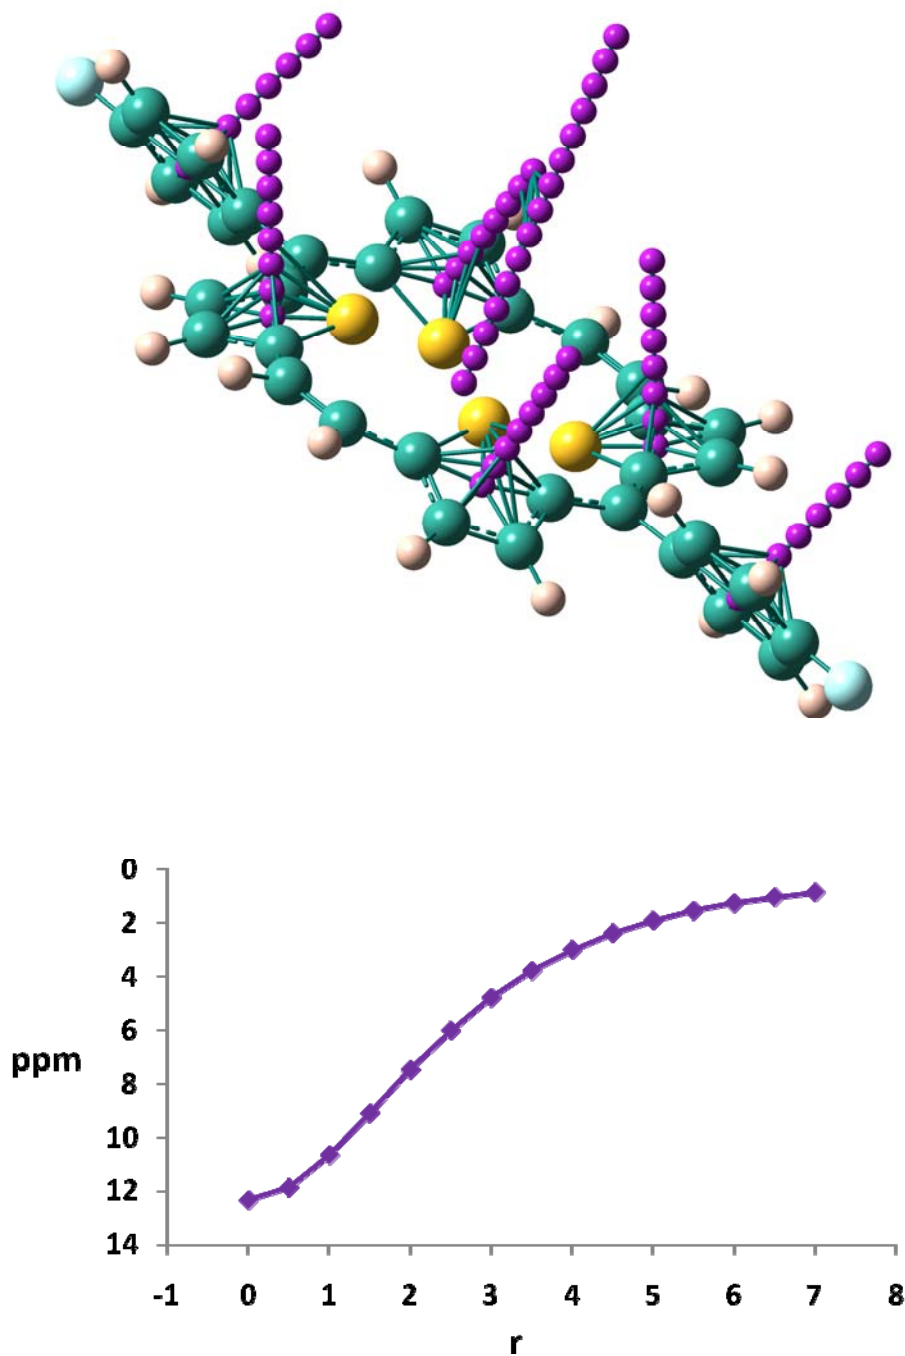

**Figure S36:** Placement of the ghost atoms (at 0.5 Å intervals) at the centre of all the individual rings as well as the ghost ring of **12b** (anti aromatic). The +ve NICS values (NICS 1 = 10.65) indicates the antiaromatic behaviour of the dication **12b**. The resulting NICS vs.  $r$  (distance from centre in Å) graph is also shown for the main centre of the **12b**. The graphs for the four thiophene rings are also shown (Figure S37).

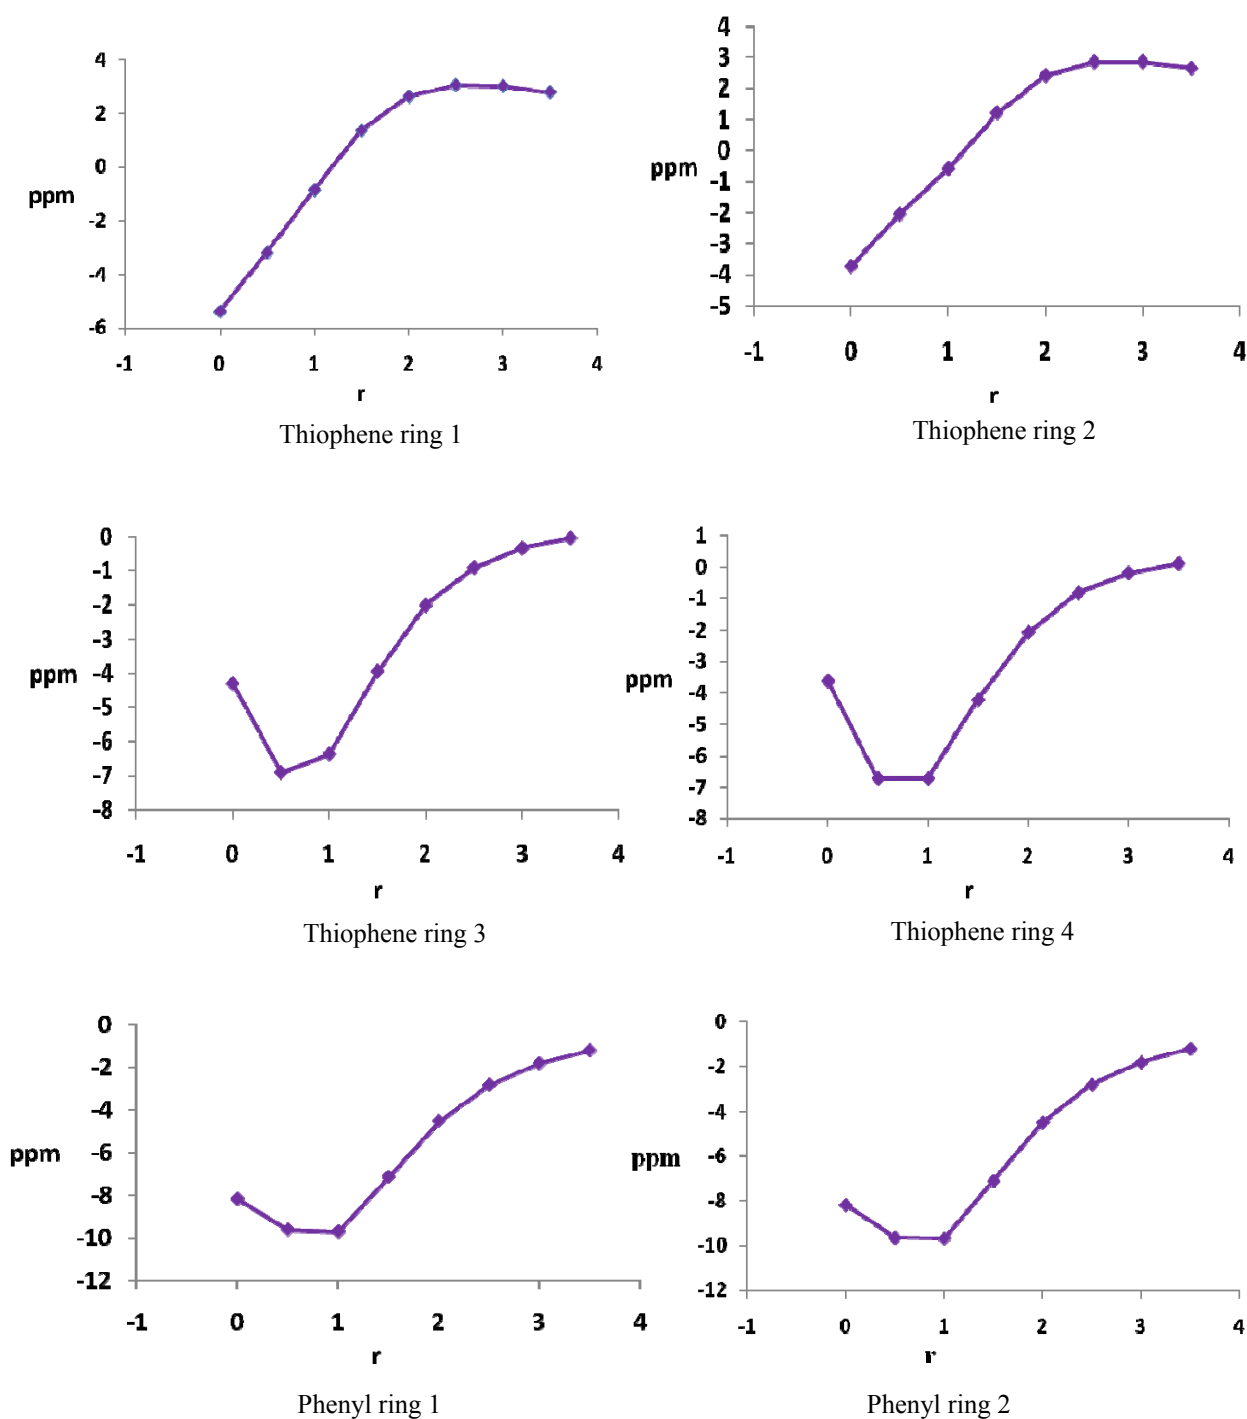

**Figure S37:** For **12b** As shown at the top, at the centre of a set of two thiophene rings aromaticity (-ve NICS) is lost at about 1 Å distance and antiaromatic ring current is then observed due to the impact of the main annulene ring. The other set of thiophenes maintain their aromaticity as they points outwards to the annulene core as shown in Fig. S36. They also show a dip at 1 Å which is not shown by a free thiophene ring. The *p*-florophenyl rings shows the normal aromaticity.

163 (LUMO+1), -0.08132 a.u.

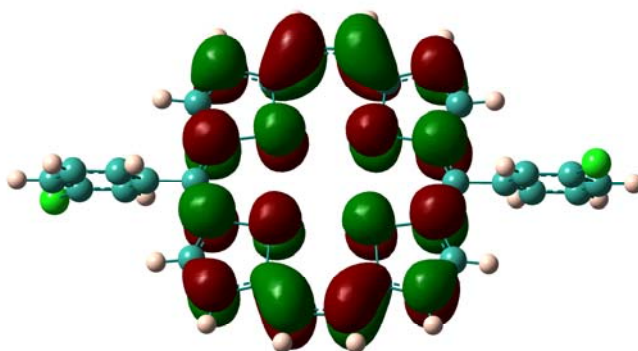

162 (LUMO), -0.10188 a.u.

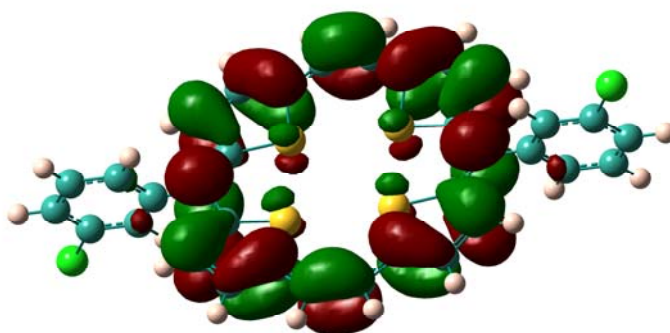

161 (HOMO), -0.18024 a.u.

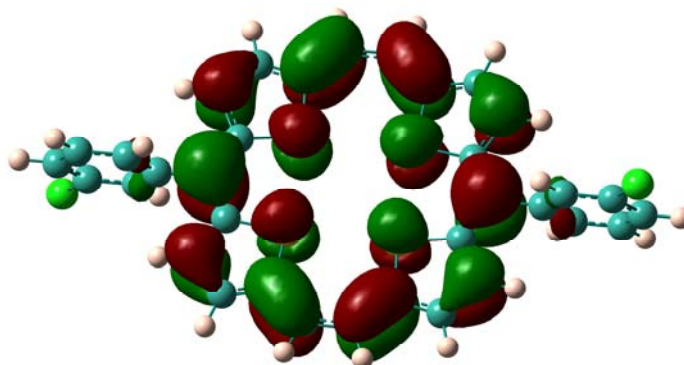

160 (HOMO-1), -0.19319 a.u.

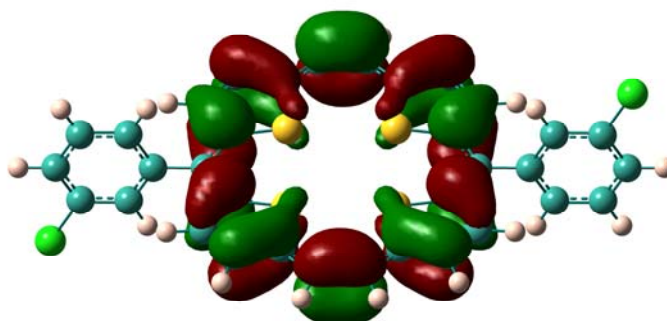

**Figure S38:** HOMO-LUMO and their neighbouring energy levels for **11a** are shown along with their energies (left) in a.u. HOMO - LUMO levels are showing high degree of delocalisation on the 22 $\pi$  annulene ring periphery. The energy of HOMO = -0.18024 a.u. and that of LUMO = -0.10188 a.u.

155 (LUMO+1), -0.07982 a.u.

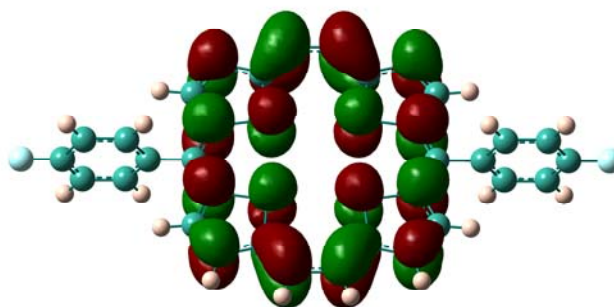

154 (LUMO), -0.10007 a.u.

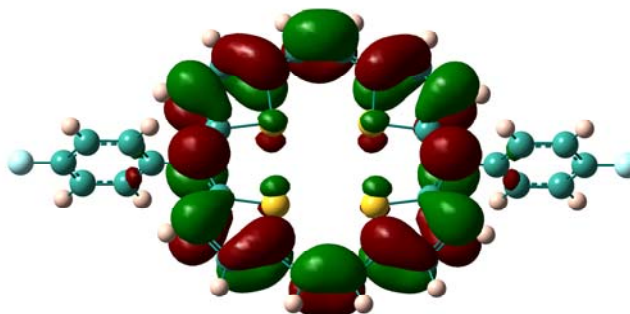

153 (HOMO), -0.17860 a.u.

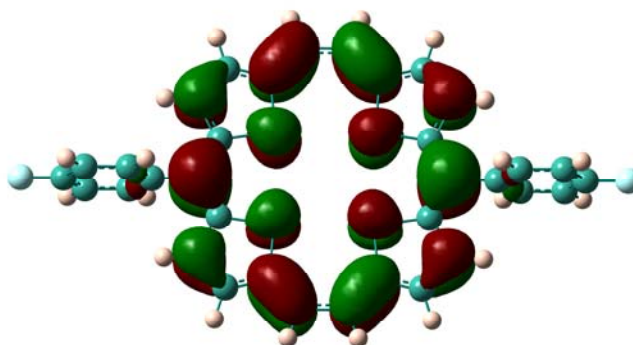

152 (HOMO-1), -0.19168 a.u.

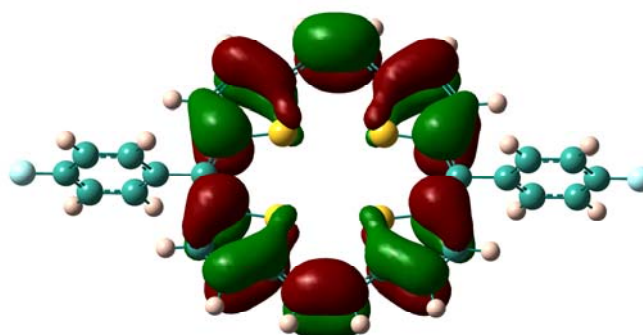

**Figure S39:** HOMO-LUMO and their neighbouring energy levels for **11b** are shown along with their energies (left) in a.u. HOMO - LUMO levels are showing high degree of delocalisation on the 22 $\pi$  annulene ring periphery. The energy of HOMO = -0.17860 a.u. and that of LUMO = -0.10007 a.u..

## Cartesian coordinates

**Table S1:** Cartesian coordinates of **11a**

SCF Done: E (RB3LYP) = -3821.16360453 a.u..

| Center<br>Number | Atomic<br>Number | Atomic<br>Type | Coordinates (Angstroms) |           |           |
|------------------|------------------|----------------|-------------------------|-----------|-----------|
|                  |                  |                | X                       | Y         | Z         |
| 1                | 16               | 0              | 1.531384                | 1.550566  | -0.136219 |
| 2                | 6                | 0              | 0.616009                | 4.241159  | 0.058379  |
| 3                | 6                | 0              | 1.655553                | 3.304537  | -0.070987 |
| 4                | 6                | 0              | 3.019430                | 3.663395  | -0.166820 |
| 5                | 1                | 0              | 3.331399                | 4.701394  | -0.145682 |
| 6                | 6                | 0              | 3.894801                | 2.605820  | -0.278562 |
| 7                | 1                | 0              | 4.967675                | 2.721984  | -0.352155 |
| 8                | 6                | 0              | 3.278349                | 1.330467  | -0.282769 |
| 9                | 6                | 0              | 3.922479                | 0.082407  | -0.377136 |
| 10               | 6                | 0              | 5.417280                | 0.114888  | -0.530463 |
| 11               | 6                | 0              | 6.001194                | 0.338373  | -1.781666 |
| 12               | 1                | 0              | 5.364074                | 0.488042  | -2.646428 |
| 13               | 6                | 0              | 7.387040                | 0.365558  | -1.917886 |
| 14               | 1                | 0              | 7.832552                | 0.537041  | -2.892251 |
| 15               | 6                | 0              | 8.211885                | 0.171465  | -0.812425 |
| 16               | 1                | 0              | 1.009752                | 5.255799  | 0.060949  |
| 17               | 16               | 0              | 1.593335                | -1.485276 | -0.161228 |
| 18               | 6                | 0              | 0.770346                | -4.212211 | -0.189886 |
| 19               | 6                | 0              | 1.775879                | -3.232787 | -0.254923 |
| 20               | 6                | 0              | 3.146930                | -3.534363 | -0.419886 |
| 21               | 1                | 0              | 3.492342                | -4.558717 | -0.500783 |
| 22               | 6                | 0              | 3.982748                | -2.440916 | -0.474073 |
| 23               | 1                | 0              | 5.054065                | -2.512847 | -0.604389 |
| 24               | 6                | 0              | 3.325642                | -1.192153 | -0.349837 |
| 25               | 6                | 0              | 6.241901                | -0.079660 | 0.582697  |
| 26               | 1                | 0              | 5.806569                | -0.250874 | 1.559851  |
| 27               | 6                | 0              | 7.623798                | -0.049276 | 0.428309  |
| 28               | 1                | 0              | 1.198289                | -5.209666 | -0.270588 |
| 29               | 16               | 0              | -1.531384               | -1.550563 | 0.136208  |
| 30               | 6                | 0              | -0.616009               | -4.241156 | -0.058386 |
| 31               | 6                | 0              | -1.655553               | -3.304534 | 0.070984  |
| 32               | 6                | 0              | -3.019429               | -3.663392 | 0.166826  |
| 33               | 1                | 0              | -3.331398               | -4.701391 | 0.145693  |
| 34               | 6                | 0              | -3.894799               | -2.605816 | 0.278569  |
| 35               | 1                | 0              | -4.967673               | -2.721981 | 0.352170  |
| 36               | 6                | 0              | -3.278348               | -1.330464 | 0.282768  |
| 37               | 6                | 0              | -3.922478               | -0.082405 | 0.377133  |
| 38               | 6                | 0              | -5.417278               | -0.114886 | 0.530466  |
| 39               | 6                | 0              | -6.001185               | -0.338356 | 1.781675  |
| 40               | 1                | 0              | -5.364062               | -0.488017 | 2.646436  |
| 41               | 6                | 0              | -7.387030               | -0.365540 | 1.917902  |

|    |    |   |           |           |           |
|----|----|---|-----------|-----------|-----------|
| 42 | 1  | 0 | -7.832538 | -0.537012 | 2.892271  |
| 43 | 6  | 0 | -8.211881 | -0.171459 | 0.812443  |
| 44 | 1  | 0 | -1.009752 | -5.255797 | -0.060953 |
| 45 | 16 | 0 | -1.593334 | 1.485278  | 0.161222  |
| 46 | 6  | 0 | -0.770347 | 4.212213  | 0.189875  |
| 47 | 6  | 0 | -1.775879 | 3.232789  | 0.254911  |
| 48 | 6  | 0 | -3.146931 | 3.534365  | 0.419869  |
| 49 | 1  | 0 | -3.492344 | 4.558719  | 0.500760  |
| 50 | 6  | 0 | -3.982748 | 2.440918  | 0.474058  |
| 51 | 1  | 0 | -5.054066 | 2.512849  | 0.604371  |
| 52 | 6  | 0 | -3.325642 | 1.192155  | 0.349828  |
| 53 | 6  | 0 | -6.241904 | 0.079649  | -0.582691 |
| 54 | 1  | 0 | -5.806577 | 0.250852  | -1.559850 |
| 55 | 6  | 0 | -7.623801 | 0.049267  | -0.428296 |
| 56 | 1  | 0 | -1.198290 | 5.209668  | 0.270573  |
| 57 | 1  | 0 | 9.290710  | 0.190275  | -0.908948 |
| 58 | 1  | 0 | -9.290705 | -0.190267 | 0.908971  |
| 59 | 17 | 0 | 8.650456  | -0.294641 | 1.837998  |
| 60 | 17 | 0 | -8.650465 | 0.294616  | -1.837983 |

**Table S2:** Cartesian coordinates of **11b**

SCF Done: E (RB3LYP) = -3100.44898875 a.u.

| Center<br>Number | Atomic<br>Number | Atomic<br>Type | Coordinates (Angstroms) |           |          |
|------------------|------------------|----------------|-------------------------|-----------|----------|
|                  |                  |                | X                       | Y         | Z        |
| 1                | 16               | 0              | 1.517613                | 0.000059  | 1.569273 |
| 2                | 6                | 0              | 4.229223                | 0.000182  | 0.696513 |
| 3                | 6                | 0              | 3.270420                | 0.000137  | 1.723818 |
| 4                | 6                | 0              | 3.601244                | 0.000139  | 3.098206 |
| 5                | 1                | 0              | 4.633765                | 0.000177  | 3.428694 |
| 6                | 6                | 0              | 2.524907                | 0.000086  | 3.957796 |
| 7                | 1                | 0              | 2.618636                | 0.000076  | 5.035369 |
| 8                | 6                | 0              | 1.261141                | 0.000042  | 3.317893 |
| 9                | 6                | 0              | 0.000000                | 0.000000  | 3.942829 |
| 10               | 6                | 0              | 0.000000                | 0.000000  | 5.445866 |
| 11               | 6                | 0              | 0.000000                | -1.203883 | 6.159156 |
| 12               | 1                | 0              | -0.000012               | -2.143791 | 5.617619 |
| 13               | 6                | 0              | 0.000002                | -1.212480 | 7.552237 |
| 14               | 1                | 0              | -0.000004               | -2.138853 | 8.115171 |

|    |    |   |           |           |           |
|----|----|---|-----------|-----------|-----------|
| 15 | 6  | 0 | 0.000000  | 0.000000  | 8.224963  |
| 16 | 1  | 0 | 5.236320  | 0.000224  | 1.109286  |
| 17 | 16 | 0 | -1.517613 | -0.000060 | 1.569273  |
| 18 | 6  | 0 | -4.229223 | -0.000182 | 0.696513  |
| 19 | 6  | 0 | -3.270420 | -0.000137 | 1.723818  |
| 20 | 6  | 0 | -3.601244 | -0.000139 | 3.098206  |
| 21 | 1  | 0 | -4.633765 | -0.000177 | 3.428694  |
| 22 | 6  | 0 | -2.524907 | -0.000086 | 3.957796  |
| 23 | 1  | 0 | -2.618636 | -0.000076 | 5.035369  |
| 24 | 6  | 0 | -1.261141 | -0.000042 | 3.317893  |
| 25 | 6  | 0 | 0.000000  | 1.203883  | 6.159156  |
| 26 | 1  | 0 | 0.000012  | 2.143791  | 5.617619  |
| 27 | 6  | 0 | -0.000002 | 1.212481  | 7.552237  |
| 28 | 1  | 0 | 0.000004  | 2.138854  | 8.115170  |
| 29 | 1  | 0 | -5.236320 | -0.000225 | 1.109286  |
| 30 | 16 | 0 | -1.517613 | -0.000060 | -1.569273 |
| 31 | 6  | 0 | -4.229223 | -0.000182 | -0.696513 |
| 32 | 6  | 0 | -3.270420 | -0.000137 | -1.723818 |
| 33 | 6  | 0 | -3.601244 | -0.000139 | -3.098206 |
| 34 | 1  | 0 | -4.633765 | -0.000177 | -3.428694 |
| 35 | 6  | 0 | -2.524907 | -0.000086 | -3.957796 |
| 36 | 1  | 0 | -2.618636 | -0.000076 | -5.035369 |
| 37 | 6  | 0 | -1.261141 | -0.000042 | -3.317893 |
| 38 | 6  | 0 | 0.000000  | 0.000000  | -3.942829 |
| 39 | 6  | 0 | 0.000000  | 0.000000  | -5.445866 |
| 40 | 6  | 0 | 0.000000  | 1.203883  | -6.159156 |
| 41 | 1  | 0 | 0.000012  | 2.143791  | -5.617619 |
| 42 | 6  | 0 | -0.000002 | 1.212481  | -7.552237 |
| 43 | 1  | 0 | 0.000004  | 2.138854  | -8.115170 |
| 44 | 6  | 0 | 0.000000  | 0.000000  | -8.224963 |
| 45 | 1  | 0 | -5.236320 | -0.000225 | -1.109286 |
| 46 | 16 | 0 | 1.517613  | 0.000059  | -1.569273 |
| 47 | 6  | 0 | 4.229223  | 0.000182  | -0.696513 |
| 48 | 6  | 0 | 3.270420  | 0.000137  | -1.723818 |
| 49 | 6  | 0 | 3.601244  | 0.000139  | -3.098206 |
| 50 | 1  | 0 | 4.633765  | 0.000177  | -3.428694 |
| 51 | 6  | 0 | 2.524907  | 0.000086  | -3.957796 |
| 52 | 1  | 0 | 2.618636  | 0.000076  | -5.035369 |
| 53 | 6  | 0 | 1.261141  | 0.000042  | -3.317893 |
| 54 | 6  | 0 | 0.000000  | -1.203883 | -6.159156 |
| 55 | 1  | 0 | -0.000012 | -2.143791 | -5.617619 |
| 56 | 6  | 0 | 0.000002  | -1.212480 | -7.552237 |
| 57 | 1  | 0 | -0.000004 | -2.138853 | -8.115171 |
| 58 | 1  | 0 | 5.236320  | 0.000224  | -1.109286 |
| 59 | 9  | 0 | 0.000000  | 0.000000  | 9.576524  |
| 60 | 9  | 0 | 0.000000  | 0.000000  | -9.576524 |

---



**Table S3:** Cartesian coordinates of **12b**

SCF Done: E (RB3LYP) = -3099.91380272 a.u.

| Center<br>Number | Atomic<br>Number | Atomic<br>Type | Coordinates (Angstroms) |           |           |
|------------------|------------------|----------------|-------------------------|-----------|-----------|
|                  |                  |                | X                       | Y         | Z         |
| 1                | 16               | 0              | -1.633314               | -1.552067 | 0.436315  |
| 2                | 6                | 0              | -0.679356               | -4.224876 | 0.095413  |
| 3                | 6                | 0              | -1.715469               | -3.224541 | -0.023758 |
| 4                | 6                | 0              | -2.981453               | -3.533913 | -0.527206 |
| 5                | 1                | 0              | -3.238239               | -4.526589 | -0.874831 |
| 6                | 6                | 0              | -3.847072               | -2.448196 | -0.576672 |
| 7                | 1                | 0              | -4.841726               | -2.495129 | -0.997932 |
| 8                | 6                | 0              | -3.294427               | -1.257893 | -0.083724 |
| 9                | 6                | 0              | -3.959290               | 0.000000  | -0.000004 |
| 10               | 6                | 0              | -5.421555               | 0.000000  | 0.000000  |
| 11               | 6                | 0              | -6.144183               | 0.925401  | -0.790573 |
| 12               | 1                | 0              | -5.611147               | 1.612479  | -1.436648 |
| 13               | 6                | 0              | -7.526729               | 0.915908  | -0.806892 |
| 14               | 1                | 0              | -8.093450               | 1.592083  | -1.435653 |
| 15               | 6                | 0              | -8.200984               | 0.000000  | 0.000009  |
| 16               | 1                | 0              | -1.108067               | -5.223936 | 0.098060  |
| 17               | 16               | 0              | -1.633316               | 1.552066  | -0.436338 |
| 18               | 6                | 0              | -0.679357               | 4.224876  | -0.095447 |
| 19               | 6                | 0              | -1.715469               | 3.224540  | 0.023734  |
| 20               | 6                | 0              | -2.981449               | 3.533913  | 0.527189  |
| 21               | 1                | 0              | -3.238234               | 4.526589  | 0.874815  |
| 22               | 6                | 0              | -3.847068               | 2.448196  | 0.576663  |
| 23               | 1                | 0              | -4.841719               | 2.495129  | 0.997930  |
| 24               | 6                | 0              | -3.294426               | 1.257892  | 0.083712  |
| 25               | 6                | 0              | -6.144178               | -0.925401 | 0.790580  |
| 26               | 1                | 0              | -5.611138               | -1.612479 | 1.436650  |
| 27               | 6                | 0              | -7.526724               | -0.915908 | 0.806906  |
| 28               | 1                | 0              | -8.093441               | -1.592084 | 1.435670  |

|    |    |   |           |           |           |
|----|----|---|-----------|-----------|-----------|
| 29 | 1  | 0 | -1.108068 | 5.223936  | -0.098106 |
| 30 | 16 | 0 | 1.633317  | 1.552066  | -0.436334 |
| 31 | 6  | 0 | 0.679356  | 4.224876  | -0.095446 |
| 32 | 6  | 0 | 1.715468  | 3.224540  | 0.023738  |
| 33 | 6  | 0 | 2.981447  | 3.533914  | 0.527196  |
| 34 | 1  | 0 | 3.238230  | 4.526590  | 0.874822  |
| 35 | 6  | 0 | 3.847066  | 2.448197  | 0.576672  |
| 36 | 1  | 0 | 4.841716  | 2.495131  | 0.997941  |
| 37 | 6  | 0 | 3.294425  | 1.257893  | 0.083720  |
| 38 | 6  | 0 | 3.959290  | 0.000001  | 0.000006  |
| 39 | 6  | 0 | 5.421555  | 0.000001  | 0.000014  |
| 40 | 6  | 0 | 6.144176  | -0.925401 | 0.790594  |
| 41 | 1  | 0 | 5.611134  | -1.612478 | 1.436664  |
| 42 | 6  | 0 | 7.526722  | -0.915908 | 0.806924  |
| 43 | 1  | 0 | 8.093437  | -1.592084 | 1.435690  |
| 44 | 6  | 0 | 8.200984  | 0.000000  | 0.000029  |
| 45 | 1  | 0 | 1.108067  | 5.223936  | -0.098103 |
| 46 | 16 | 0 | 1.633314  | -1.552067 | 0.436320  |
| 47 | 6  | 0 | 0.679357  | -4.224876 | 0.095414  |
| 48 | 6  | 0 | 1.715470  | -3.224540 | -0.023754 |
| 49 | 6  | 0 | 2.981455  | -3.533912 | -0.527200 |
| 50 | 1  | 0 | 3.238242  | -4.526588 | -0.874825 |
| 51 | 6  | 0 | 3.847074  | -2.448195 | -0.576664 |
| 52 | 1  | 0 | 4.841728  | -2.495128 | -0.997922 |
| 53 | 6  | 0 | 3.294427  | -1.257892 | -0.083716 |
| 54 | 6  | 0 | 6.144185  | 0.925402  | -0.790559 |
| 55 | 1  | 0 | 5.611151  | 1.612480  | -1.436634 |
| 56 | 6  | 0 | 7.526731  | 0.915908  | -0.806874 |
| 57 | 1  | 0 | 8.093454  | 1.592083  | -1.435633 |
| 58 | 1  | 0 | 1.108068  | -5.223936 | 0.098062  |
| 59 | 9  | 0 | -9.527029 | 0.000000  | 0.000013  |
| 60 | 9  | 0 | 9.527029  | 0.000000  | 0.000036  |

---

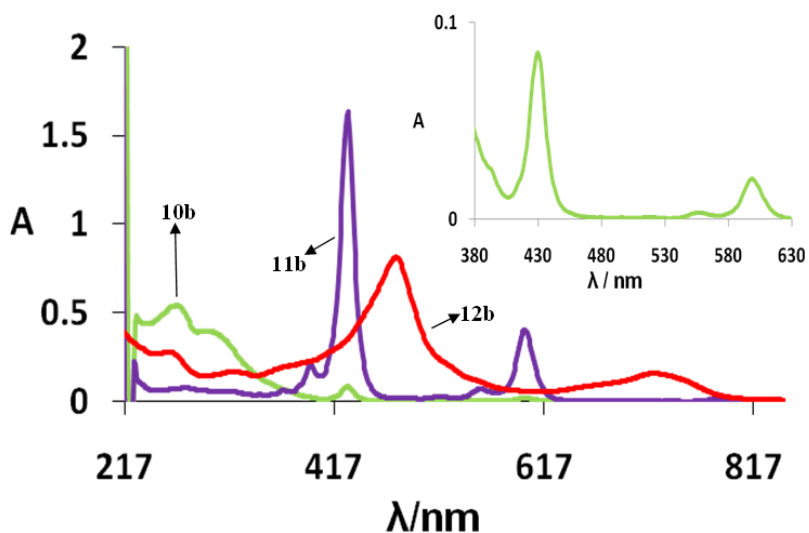

**Figure S40:** UV-Vis. spectra of **10b** (DCM), **11b** (DCM) and **12b** (H<sub>2</sub>SO<sub>4</sub>). (Inset shows the partial auto-oxidation of the **10b** into **11b**)

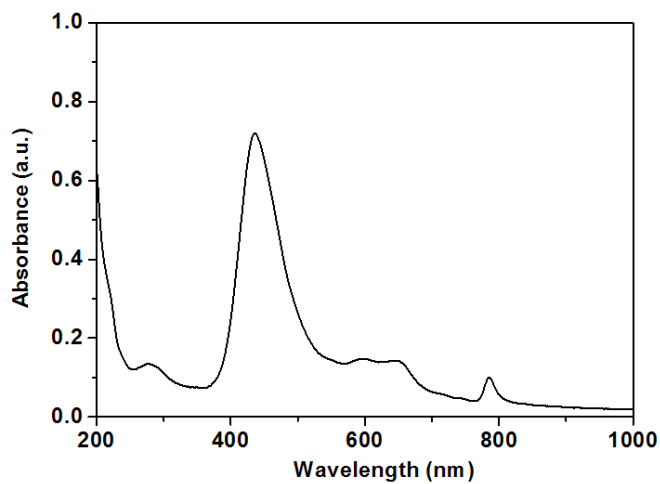

**Figure S40a:** UV-Vis. spectra of thin film of **11a**.

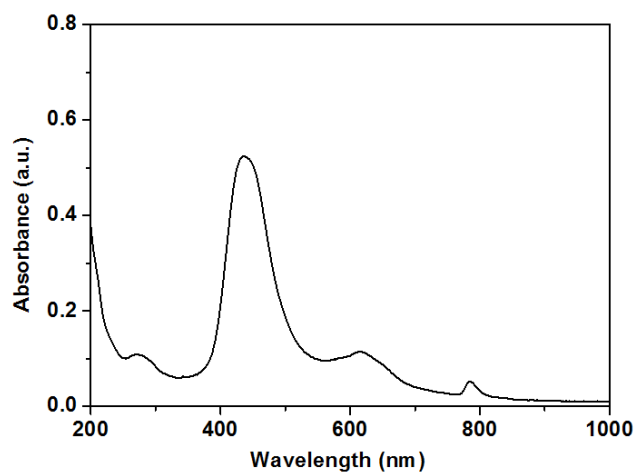

**Figure S40b:** UV-Vis. spectra of thin film of **11b**.

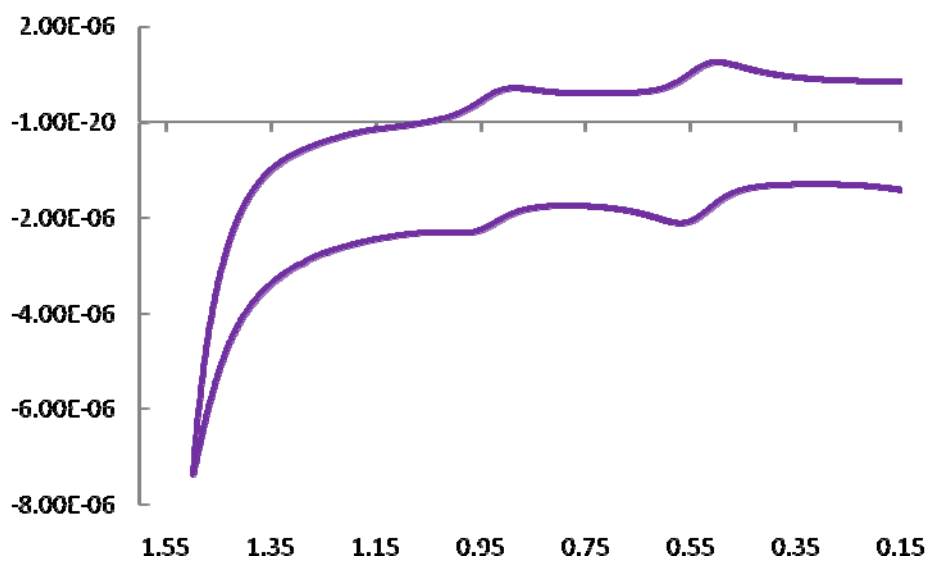

**Figure S41:** Cyclic voltammogram (CV) for **11b** (DCM, electrolyte TBAPF<sub>6</sub>; working electrode: Pt; ref. electrode: Ag/AgCl; Scan rate 100 mV s<sup>-1</sup>).

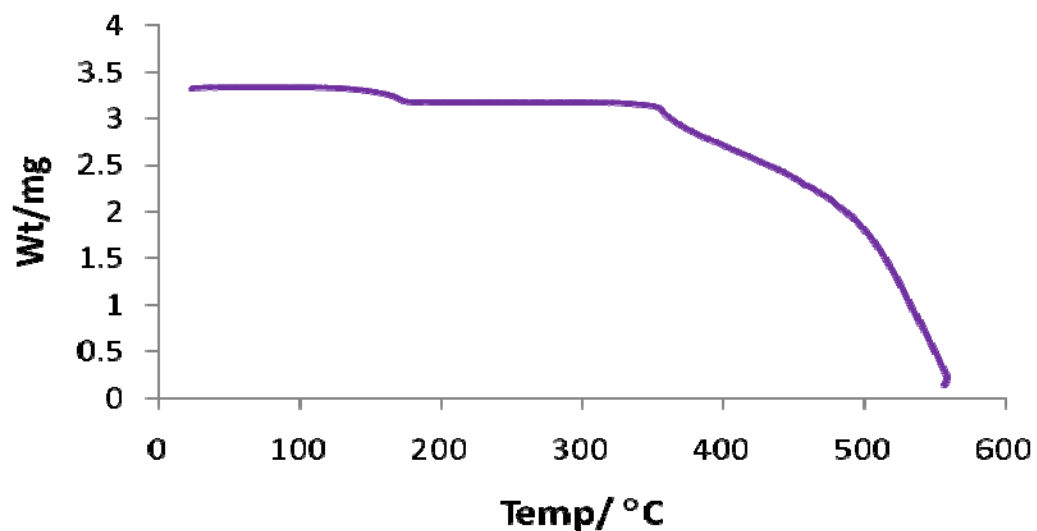

**Figure S42:** TGA Analysis of **11a** under N<sub>2</sub> with temperature rise of 10°C per minute. Thus **11a** is highly stable as it is having a high thermal decomposition temp. of about >355°C.

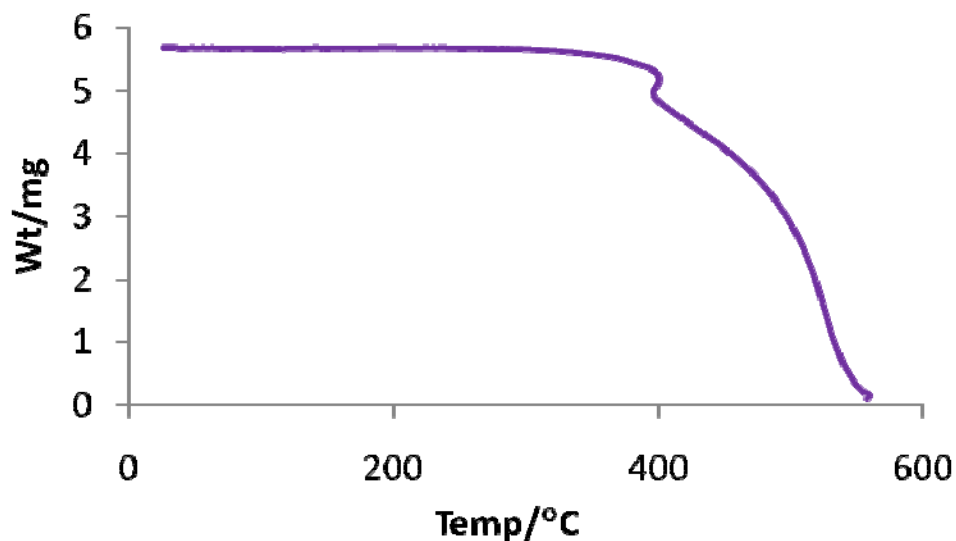

**Figure S43:** TGA Analysis of **11b** under N<sub>2</sub> with temperature rise of 10°C per minute. Thus **11b** is highly stable as it is having a high thermal decomposition temp. of about >355°C.

### X-Ray Diffraction Analysis of 11a:

Single crystals of **11a** suitable for an X-Ray crystal structure determination were grown in a dark, quiet and undisturbed place from dry DCM with a toluene layer upon it (2 weeks).

**Table S4:** The crystallographic data for **11a**.

|                                   |                                                                                                                 |
|-----------------------------------|-----------------------------------------------------------------------------------------------------------------|
| Empirical formula                 | C <sub>136</sub> H <sub>80</sub> Cl <sub>8</sub> S <sub>16</sub>                                                |
| Formula weight                    | 2510.56                                                                                                         |
| Temperature                       | 150(2) K                                                                                                        |
| Wavelength                        | 1.54180 Å                                                                                                       |
| Crystal system, space group       | Orthorhombic, F d d 2                                                                                           |
| Unit cell dimensions              | a = 60.299(6) Å    alpha = 90 deg.<br>b = 19.5214(15) Å    beta = 90 deg.<br>c = 9.5973(8) Å    gamma = 90 deg. |
| Volume                            | 11297.2(17) Å <sup>3</sup>                                                                                      |
| Z, Calculated density             | 4, 1.476 Mg/m <sup>3</sup>                                                                                      |
| Absorption coefficient            | 5.018 mm <sup>-1</sup>                                                                                          |
| F(000)                            | 5152                                                                                                            |
| Crystal size                      | 0.23 x 0.18 x 0.14 mm                                                                                           |
| Theta range for data collection   | 2.93 to 72.40 deg.                                                                                              |
| Limiting indices                  | -72 ≤ h ≤ 73, -22 ≤ k ≤ 23, -9 ≤ l ≤ 11                                                                         |
| Reflections collected / unique    | 19859 / 4940 [R(int) = 0.0462]                                                                                  |
| Completeness to theta = 72.40     | 99.3 %                                                                                                          |
| Absorption correction             | Semi-empirical from equivalents                                                                                 |
| Max. and min. transmission        | 0.5401 and 0.3915                                                                                               |
| Refinement method                 | Full-matrix least-squares on F <sup>2</sup>                                                                     |
| Data / restraints / parameters    | 4940 / 1 / 361                                                                                                  |
| Goodness-of-fit on F <sup>2</sup> | 1.072                                                                                                           |
| Final R indices [I > 2σ(I)]       | R1 = 0.0503, wR2 = 0.1381                                                                                       |

|                              |                                    |
|------------------------------|------------------------------------|
| R indices (all data)         | R1 = 0.0529, wR2 = 0.1411          |
| Absolute structure parameter | 0.00(2)                            |
| Largest diff. peak and hole  | 0.397 and -0.321 e.Å <sup>-3</sup> |

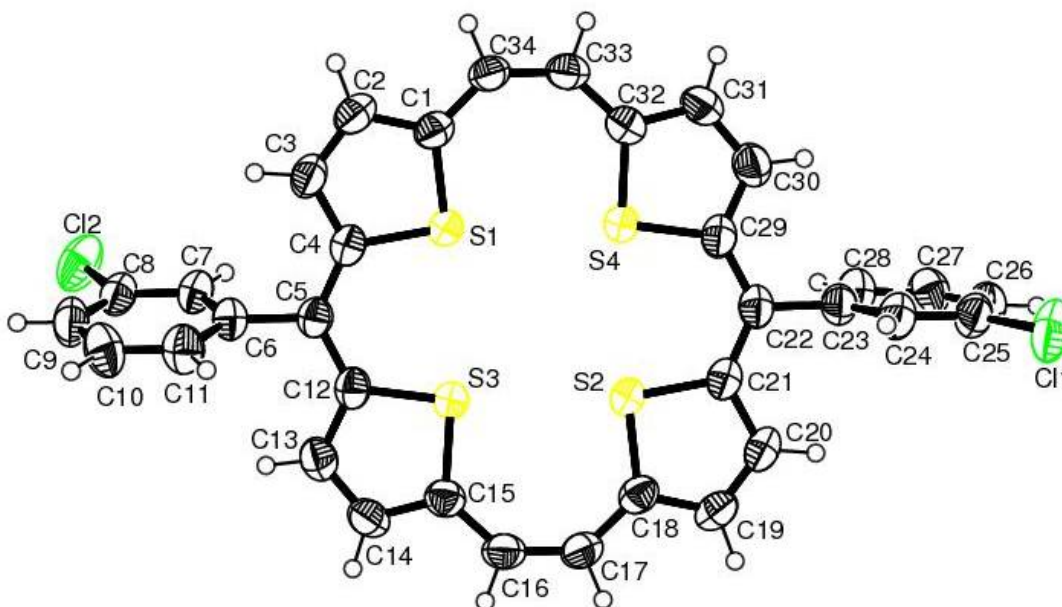

**Table S5:** Torsion angles [deg] for **11a**.

|                       |           |
|-----------------------|-----------|
| C(4)-S(1)-C(1)-C(34)  | -176.7(4) |
| C(4)-S(1)-C(1)-C(2)   | -0.2(3)   |
| C(34)-C(1)-C(2)-C(3)  | 176.9(4)  |
| S(1)-C(1)-C(2)-C(3)   | 0.1(5)    |
| C(1)-C(2)-C(3)-C(4)   | 0.0(6)    |
| C(2)-C(3)-C(4)-C(5)   | 179.3(4)  |
| C(2)-C(3)-C(4)-S(1)   | -0.1(5)   |
| C(1)-S(1)-C(4)-C(5)   | -179.3(3) |
| C(1)-S(1)-C(4)-C(3)   | 0.1(3)    |
| C(3)-C(4)-C(5)-C(12)  | -173.0(4) |
| S(1)-C(4)-C(5)-C(12)  | 6.3(6)    |
| C(3)-C(4)-C(5)-C(6)   | 7.0(6)    |
| S(1)-C(4)-C(5)-C(6)   | -173.8(3) |
| C(4)-C(5)-C(6)-C(7)   | 69.9(5)   |
| C(12)-C(5)-C(6)-C(7)  | -110.1(5) |
| C(4)-C(5)-C(6)-C(11)  | -110.1(5) |
| C(12)-C(5)-C(6)-C(11) | 69.9(5)   |
| C(11)-C(6)-C(7)-C(8)  | 0.0(7)    |
| C(5)-C(6)-C(7)-C(8)   | 180.0(4)  |
| C(6)-C(7)-C(8)-C(9)   | 0.6(7)    |
| C(6)-C(7)-C(8)-Cl(2)  | -178.5(4) |
| C(7)-C(8)-C(9)-C(10)  | -0.5(8)   |
| Cl(2)-C(8)-C(9)-C(10) | 178.6(4)  |
| C(8)-C(9)-C(10)-C(11) | -0.1(9)   |

|                         |           |
|-------------------------|-----------|
| C(9)-C(10)-C(11)-C(6)   | 0.7(9)    |
| C(7)-C(6)-C(11)-C(10)   | -0.6(8)   |
| C(5)-C(6)-C(11)-C(10)   | 179.4(5)  |
| C(4)-C(5)-C(12)-C(13)   | -178.1(4) |
| C(6)-C(5)-C(12)-C(13)   | 1.9(6)    |
| C(4)-C(5)-C(12)-S(3)    | 2.7(6)    |
| C(6)-C(5)-C(12)-S(3)    | -177.2(3) |
| C(15)-S(3)-C(12)-C(13)  | -1.3(3)   |
| C(15)-S(3)-C(12)-C(5)   | 178.1(3)  |
| C(5)-C(12)-C(13)-C(14)  | -178.0(4) |
| S(3)-C(12)-C(13)-C(14)  | 1.3(5)    |
| C(12)-C(13)-C(14)-C(15) | -0.7(6)   |
| C(13)-C(14)-C(15)-C(16) | -179.5(4) |
| C(13)-C(14)-C(15)-S(3)  | -0.3(5)   |
| C(12)-S(3)-C(15)-C(16)  | -179.9(4) |
| C(12)-S(3)-C(15)-C(14)  | 0.9(3)    |
| C(14)-C(15)-C(16)-C(17) | 179.3(5)  |
| S(3)-C(15)-C(16)-C(17)  | 0.3(8)    |
| C(15)-C(16)-C(17)-C(18) | -0.1(10)  |
| C(16)-C(17)-C(18)-C(19) | -173.0(5) |
| C(16)-C(17)-C(18)-S(2)  | 3.0(8)    |
| C(21)-S(2)-C(18)-C(19)  | 4.1(3)    |
| C(21)-S(2)-C(18)-C(17)  | -172.3(4) |
| C(17)-C(18)-C(19)-C(20) | 173.2(4)  |
| S(2)-C(18)-C(19)-C(20)  | -3.4(5)   |
| C(18)-C(19)-C(20)-C(21) | 0.6(6)    |
| C(19)-C(20)-C(21)-C(22) | -173.1(4) |
| C(19)-C(20)-C(21)-S(2)  | 2.5(5)    |
| C(18)-S(2)-C(21)-C(22)  | 171.9(4)  |
| C(18)-S(2)-C(21)-C(20)  | -3.8(3)   |
| C(20)-C(21)-C(22)-C(29) | 175.4(4)  |
| S(2)-C(21)-C(22)-C(29)  | 0.5(6)    |
| C(20)-C(21)-C(22)-C(23) | 0.5(6)    |
| S(2)-C(21)-C(22)-C(23)  | -174.4(3) |
| C(21)-C(22)-C(23)-C(24) | -78.5(6)  |
| C(29)-C(22)-C(23)-C(24) | 105.9(5)  |
| C(21)-C(22)-C(23)-C(28) | 100.8(5)  |
| C(29)-C(22)-C(23)-C(28) | -74.7(6)  |
| C(28)-C(23)-C(24)-C(25) | -1.2(7)   |
| C(22)-C(23)-C(24)-C(25) | 178.2(4)  |
| C(23)-C(24)-C(25)-C(26) | -0.9(8)   |
| C(23)-C(24)-C(25)-Cl(1) | -179.9(4) |
| C(24)-C(25)-C(26)-C(27) | 1.8(8)    |
| Cl(1)-C(25)-C(26)-C(27) | -179.2(4) |
| C(25)-C(26)-C(27)-C(28) | -0.6(8)   |
| C(26)-C(27)-C(28)-C(23) | -1.4(8)   |
| C(24)-C(23)-C(28)-C(27) | 2.3(8)    |
| C(22)-C(23)-C(28)-C(27) | -177.0(5) |
| C(21)-C(22)-C(29)-C(30) | -177.7(4) |
| C(23)-C(22)-C(29)-C(30) | -2.8(7)   |
| C(21)-C(22)-C(29)-S(4)  | 0.7(6)    |
| C(23)-C(22)-C(29)-S(4)  | 175.6(3)  |
| C(32)-S(4)-C(29)-C(22)  | -178.0(4) |
| C(32)-S(4)-C(29)-C(30)  | 0.7(4)    |
| C(22)-C(29)-C(30)-C(31) | 178.4(4)  |
| S(4)-C(29)-C(30)-C(31)  | -0.2(5)   |
| C(29)-C(30)-C(31)-C(32) | -0.4(7)   |
| C(30)-C(31)-C(32)-C(33) | 177.0(4)  |



|                         |           |
|-------------------------|-----------|
| C(30)-C(31)-C(32)-S(4)  | 0.9(6)    |
| C(29)-S(4)-C(32)-C(33)  | -176.7(4) |
| C(29)-S(4)-C(32)-C(31)  | -0.9(4)   |
| C(31)-C(32)-C(33)-C(34) | -179.4(5) |
| S(4)-C(32)-C(33)-C(34)  | -4.2(8)   |
| C(32)-C(33)-C(34)-C(1)  | -7.9(10)  |
| C(2)-C(1)-C(34)-C(33)   | -177.8(5) |
| S(1)-C(1)-C(34)-C(33)   | -1.7(8)   |

---

The crystal structure has been deposited at the Cambridge Crystallographic Data Centre (CCDC 900288). The data can be obtained free of charge via the Internet at [www.ccdc.cam.ac.uk/data\\_request/cif](http://www.ccdc.cam.ac.uk/data_request/cif).

## Device Fabrication:

### Experimental:

OFET devices were fabricated in the top-contact device configuration. The substrate was heavily doped, n-type Si gate electrode with a 500 nm thick SiO<sub>2</sub> layer as the gate dielectric. The gate dielectric was treated with octadecyltrichlorosilane (OTS) by vapor deposition method. Subsequently, organic semiconductors were deposited on the substrate by thermal evaporation under a pressure of  $8 \times 10^{-4}$  Pa at a deposition rate gradually increased from 0.1 Å s<sup>-1</sup> to 0.4 Å s<sup>-1</sup> at the first 20 nm and then maintained 0.5 Å s<sup>-1</sup> until the thickness of the film was 50 nm. The deposition rate and film thickness were monitored by a quartz crystal microbalance (ULVAC CRTM-6000). Finally, 20 nm thick gold source and drain electrode were deposited through a shadow mask. The channel length (*L*) and width (*W*) were 0.11 mm and 5.30 mm, respectively. The FET characteristics were measured at room temperature in air using Keithley 4200 SCS. Atomic force microscopy (AFM) measurements were carried out with a Nanoscope IIIa instrument (Digital Instruments) operating in tapping mode. UV-Vis spectra were recorded on a JASCO V-570 spectrometer.

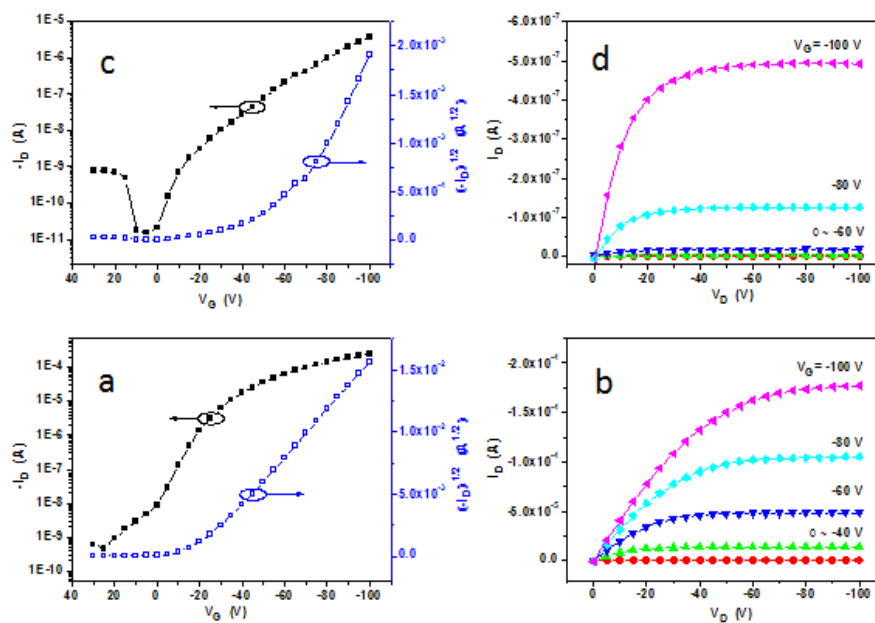

**Figure S44:** Typical transfer (a) and output (b) characteristics of FET devices based on **11a**, with OTS-treated SiO<sub>2</sub>/Si substrate ( $T_s = 100$  °C). Typical transfer (c) and output (d) characteristics of FET devices based on **11b**, with OTS-treated SiO<sub>2</sub>/Si substrate ( $T_s = 100$  °C).

### CIF Files for **11a**:

data\_gnu005

```
_audit_creation_method          SHELXL-97
_chemical_name_systematic
;
?
;
_chemical_name_common           ?
_chemical_melting_point         ?
_chemical_formula_moiety        ?
_chemical_formula_sum           'C136 H80 Cl8 S16'
_chemical_formula_weight        2510.56

loop_
  _atom_type_symbol
  _atom_type_description
  _atom_type_scatter_dispersion_real
  _atom_type_scatter_dispersion_imag
  _atom_type_scatter_source
  'C' 'C' 0.0181 0.0091
  'International Tables Vol C Tables 4.2.6.8 and 6.1.1.4'
  'H' 'H' 0.0000 0.0000
  'International Tables Vol C Tables 4.2.6.8 and 6.1.1.4'
  'Cl' 'Cl' 0.3639 0.7018
  'International Tables Vol C Tables 4.2.6.8 and 6.1.1.4'
  'S' 'S' 0.3331 0.5567
  'International Tables Vol C Tables 4.2.6.8 and 6.1.1.4'

_symmetry_cell_setting          'Orthorhombic'
_symmetry_space_group_name_H-M 'F d d 2'

loop_
  _symmetry_equiv_pos_as_xyz
  'x, y, z'
  '-x, -y, z'
  'x+1/4, -y+1/4, z+1/4'
  '-x+1/4, y+1/4, z+1/4'
  'x, y+1/2, z+1/2'
  '-x, -y+1/2, z+1/2'
  'x+1/4, -y+3/4, z+3/4'
  '-x+1/4, y+3/4, z+3/4'
  'x+1/2, y, z+1/2'
  '-x+1/2, -y, z+1/2'
  'x+3/4, -y+1/4, z+3/4'
  '-x+3/4, y+1/4, z+3/4'
  'x+1/2, y+1/2, z'
  '-x+1/2, -y+1/2, z'
  'x+3/4, -y+3/4, z+1/4'
  '-x+3/4, y+3/4, z+1/4'

_cell_length_a                  60.299(6)
_cell_length_b                  19.5214(15)
_cell_length_c                  9.5973(8)
_cell_angle_alpha               90.00
_cell_angle_beta                90.00
```

```
_cell_angle_gamma          90.00
_cell_volume                11297.2(17)
_cell_formula_units_Z      4
_cell_measurement_temperature 150(2)
_cell_measurement_reflns_used 8176
_cell_measurement_theta_min 2.9328
_cell_measurement_theta_max 72.2146

_exptl_crystal_description BLOCK
_exptl_crystal_colour      BLACK
_exptl_crystal_size_max    0.23
_exptl_crystal_size_mid    0.18
_exptl_crystal_size_min    0.14
_exptl_crystal_density_meas ?
_exptl_crystal_density_diffrn 1.476
_exptl_crystal_density_method 'not measured'
_exptl_crystal_F_000       5152
_exptl_absorpt_coefficient_mu 5.018
_exptl_absorpt_correction_T_min 0.3915
_exptl_absorpt_correction_T_max 0.5401
_exptl_absorpt_correction_type multi-scan
_exptl_absorpt_process_details
;
(CrysAlis RED; Oxford Diffraction, 2009)
;

_diffrn_ambient_temperature 150(2)
_diffrn_radiation_wavelength 1.54180
_diffrn_radiation_type      CuK\alpha
_diffrn_radiation_source     'Micro-Focus (Cu) X-ray Source'
_diffrn_radiation_monochromator graphite
_diffrn_measurement_device_type 'OXFORD DIFFRACTION SUPER NOVA'
_diffrn_measurement_method    '\w/q-scan'
_diffrn_detector_area_resol_mean 15.9948
_diffrn_standards_number     ?
_diffrn_standards_interval_count ?
_diffrn_standards_interval_time ?
_diffrn_standards_decay_%    ?
_diffrn_reflns_number        19859
_diffrn_reflns_av_R_equivalents 0.0462
_diffrn_reflns_av_sigmaI/netI 0.0312
_diffrn_reflns_limit_h_min   -72
_diffrn_reflns_limit_h_max    73
_diffrn_reflns_limit_k_min   -22
_diffrn_reflns_limit_k_max    23
_diffrn_reflns_limit_l_min   -9
_diffrn_reflns_limit_l_max    11
_diffrn_reflns_theta_min     2.93
_diffrn_reflns_theta_max     72.40
_reflns_number_total         4940
_reflns_number_gt            4655
_reflns_threshold_expression  >2sigma(I)

_computing_data_collection   'CrysAlis CCD, Oxford Diffraction
Ltd.,'
_computing_cell_refinement    'CrysAlis RED, Oxford Diffraction
Ltd.,'
```

```
_computing_data_reduction      'CrysAlis RED, Oxford Diffraction  
Ltd.,'  
_computing_structure_solution  'SHELXS-97 (Sheldrick, 1997)'  
_computing_structure_refinement 'SHELXL-97 (Sheldrick, 1997)'  
_computing_molecular_graphics  'Ortep3'  
_computing_publication_material 'Shelx97'  
  
_refine_special_details  
;  
Refinement of F2 against ALL reflections. The weighted R-factor wR  
and  
goodness of fit S are based on F2, conventional R-factors R are  
based  
on F, with F set to zero for negative F2. The threshold expression  
of  
F2 > 2sigma(F2) is used only for calculating R-factors(gt) etc.  
and is  
not relevant to the choice of reflections for refinement. R-factors  
based  
on F2 are statistically about twice as large as those based on F,  
and R-  
factors based on ALL data will be even larger.  
;  
  
_refine_ls_structure_factor_coef Fsqd  
_refine_ls_matrix_type          full  
_refine_ls_weighting_scheme     calc  
_refine_ls_weighting_details  
'calc w=1/[\s2(Fo2)+(0.0970P)2+9.1277P] where  
P=(Fo2+2Fc2)/3'  
_atom_sites_solution_primary   direct  
_atom_sites_solution_secondary difmap  
_atom_sites_solution_hydrogens geom  
_refine_ls_hydrogen_treatment  riding  
_refine_ls_extinction_method   none  
_refine_ls_extinction_coef     ?  
_refine_ls_abs_structure_details  
'Flack H D (1983), Acta Cryst. A39, 876-881'  
_refine_ls_abs_structure_Flack 0.00(2)  
_refine_ls_number_reflns       4940  
_refine_ls_number_parameters    361  
_refine_ls_number_restraints    1  
_refine_ls_R_factor_all        0.0529  
_refine_ls_R_factor_gt         0.0503  
_refine_ls_wR_factor_ref       0.1411  
_refine_ls_wR_factor_gt        0.1381  
_refine_ls_goodness_of_fit_ref 1.072  
_refine_ls_restrained_S_all    1.072  
_refine_ls_shift/su_max        0.000  
_refine_ls_shift/su_mean       0.000  
  
loop_  
_atom_site_label  
_atom_site_type_symbol  
_atom_site_fract_x  
_atom_site_fract_y  
_atom_site_fract_z  
_atom_site_U_iso_or_equiv
```

```
_atom_site_adp_type
_atom_site_occupancy
_atom_site_symmetry_multiplicity
_atom_site_calc_flag
_atom_site_refinement_flags
_atom_site_disorder_assembly
_atom_site_disorder_group
S1 S 0.113642(14) 0.37324(5) 0.91723(11) 0.0467(2) Uani 1 1 d . . .
S2 S 0.184951(14) 0.33268(5) 0.90660(11) 0.0474(2) Uani 1 1 d . . .
S3 S 0.145561(15) 0.31985(5) 0.69777(11) 0.0487(2) Uani 1 1 d . . .
S4 S 0.152939(15) 0.39138(6) 1.12089(10) 0.0506(2) Uani 1 1 d . . .
Cl1 Cl 0.26458(2) 0.34249(9) 1.49820(19) 0.0886(5) Uani 1 1 d . . .
Cl2 Cl 0.03607(2) 0.42986(8) 0.35524(18) 0.0848(4) Uani 1 1 d . . .
C1 C 0.09336(6) 0.3904(2) 1.0407(5) 0.0477(9) Uani 1 1 d . . .
C2 C 0.07237(7) 0.3775(2) 0.9809(5) 0.0557(10) Uani 1 1 d . . .
H2 H 0.0589 0.3838 1.0307 0.067 Uiso 1 1 calc R . .
C3 C 0.07289(6) 0.3555(2) 0.8470(5) 0.0550(10) Uani 1 1 d . . .
H3 H 0.0599 0.3451 0.7954 0.066 Uiso 1 1 calc R . .
C4 C 0.09426(6) 0.34941(19) 0.7910(5) 0.0455(8) Uani 1 1 d . . .
C5 C 0.09968(6) 0.32730(18) 0.6566(5) 0.0448(8) Uani 1 1 d . . .
C6 C 0.08050(6) 0.3165(2) 0.5599(5) 0.0472(8) Uani 1 1 d . . .
C7 C 0.06835(6) 0.3715(2) 0.5097(5) 0.0505(9) Uani 1 1 d . . .
H7 H 0.0721 0.4169 0.5364 0.061 Uiso 1 1 calc R . .
C8 C 0.05068(6) 0.3599(2) 0.4202(5) 0.0537(9) Uani 1 1 d . . .
C9 C 0.04460(7) 0.2954(3) 0.3802(6) 0.0658(12) Uani 1 1 d . . .
H9 H 0.0324 0.2883 0.3195 0.079 Uiso 1 1 calc R . .
C10 C 0.05682(9) 0.2404(3) 0.4309(6) 0.0706(13) Uani 1 1 d . . .
H10 H 0.0529 0.1951 0.4045 0.085 Uiso 1 1 calc R . .
C11 C 0.07447(8) 0.2503(2) 0.5183(6) 0.0598(11) Uani 1 1 d . . .
H11 H 0.0827 0.2120 0.5509 0.072 Uiso 1 1 calc R . .
C12 C 0.12097(6) 0.31410(18) 0.6021(5) 0.0470(8) Uani 1 1 d . . .
C13 C 0.12608(7) 0.2938(2) 0.4658(5) 0.0548(9) Uani 1 1 d . . .
H13 H 0.1152 0.2883 0.3954 0.066 Uiso 1 1 calc R . .
C14 C 0.14810(7) 0.2825(2) 0.4432(5) 0.0560(9) Uani 1 1 d . . .
H14 H 0.1537 0.2680 0.3554 0.067 Uiso 1 1 calc R . .
C15 C 0.16194(7) 0.2936(2) 0.5582(5) 0.0501(9) Uani 1 1 d . . .
C16 C 0.18499(7) 0.2850(2) 0.5536(5) 0.0557(10) Uani 1 1 d . . .
H16 H 0.1898 0.2704 0.4642 0.067 Uiso 1 1 calc R . .
C17 C 0.20254(6) 0.2921(2) 0.6447(5) 0.0552(10) Uani 1 1 d . . .
H17 H 0.2163 0.2811 0.6019 0.066 Uiso 1 1 calc R . .
C18 C 0.20531(6) 0.31158(19) 0.7848(5) 0.0492(9) Uani 1 1 d . . .
C19 C 0.22626(6) 0.3210(2) 0.8462(6) 0.0570(10) Uani 1 1 d . . .
H19 H 0.2397 0.3100 0.7993 0.068 Uiso 1 1 calc R . .
C20 C 0.22593(6) 0.3468(2) 0.9773(5) 0.0566(11) Uani 1 1 d . . .
H20 H 0.2390 0.3558 1.0291 0.068 Uiso 1 1 calc R . .
C21 C 0.20435(6) 0.3593(2) 1.0305(5) 0.0486(9) Uani 1 1 d . . .
C22 C 0.19909(6) 0.3919(2) 1.1558(5) 0.0508(9) Uani 1 1 d . . .
C23 C 0.21852(6) 0.4165(2) 1.2416(5) 0.0523(9) Uani 1 1 d . . .
C24 C 0.23068(7) 0.3722(3) 1.3219(6) 0.0589(10) Uani 1 1 d . . .
H24 H 0.2268 0.3250 1.3275 0.071 Uiso 1 1 calc R . .
C25 C 0.24914(7) 0.3985(3) 1.3968(5) 0.0609(11) Uani 1 1 d . . .
C26 C 0.25502(7) 0.4655(3) 1.3886(6) 0.0672(12) Uani 1 1 d . . .
H26 H 0.2677 0.4819 1.4373 0.081 Uiso 1 1 calc R . .
C27 C 0.24256(8) 0.5091(3) 1.3097(6) 0.0700(13) Uani 1 1 d . . .
H27 H 0.2465 0.5561 1.3044 0.084 Uiso 1 1 calc R . .
C28 C 0.22424(7) 0.4857(2) 1.2373(5) 0.0611(11) Uani 1 1 d . . .
H28 H 0.2155 0.5168 1.1844 0.073 Uiso 1 1 calc R . .
C29 C 0.17796(6) 0.4090(2) 1.2067(5) 0.0511(9) Uani 1 1 d . . .
```

C30 C 0.17314(7) 0.4439(3) 1.3311(5) 0.0608(11) Uani 1 1 d . . .  
H30 H 0.1843 0.4583 1.3944 0.073 Uiso 1 1 calc R . .  
C31 C 0.15105(8) 0.4553(3) 1.3535(5) 0.0621(11) Uani 1 1 d . . .  
H31 H 0.1457 0.4781 1.4343 0.075 Uiso 1 1 calc R . .  
C32 C 0.13680(7) 0.4310(2) 1.2489(5) 0.0504(9) Uani 1 1 d . . .  
C33 C 0.11373(7) 0.4355(2) 1.2577(5) 0.0535(9) Uani 1 1 d . . .  
H33 H 0.1090 0.4571 1.3413 0.064 Uiso 1 1 calc R . .  
C34 C 0.09596(6) 0.4163(2) 1.1746(5) 0.0521(9) Uani 1 1 d . . .  
H34 H 0.0821 0.4223 1.2206 0.062 Uiso 1 1 calc R . .

loop\_

\_atom\_site\_aniso\_label  
\_atom\_site\_aniso\_U\_11  
\_atom\_site\_aniso\_U\_22  
\_atom\_site\_aniso\_U\_33  
\_atom\_site\_aniso\_U\_23  
\_atom\_site\_aniso\_U\_13  
\_atom\_site\_aniso\_U\_12  
S1 0.0368(4) 0.0591(5) 0.0443(5) -0.0034(4) -0.0015(3) 0.0022(3)  
S2 0.0359(4) 0.0573(5) 0.0489(5) -0.0034(4) -0.0029(3) 0.0018(3)  
S3 0.0405(4) 0.0598(5) 0.0458(5) -0.0069(4) -0.0033(4) 0.0031(4)  
S4 0.0396(4) 0.0676(6) 0.0446(5) -0.0063(4) -0.0029(4) 0.0027(4)  
C11 0.0624(7) 0.1088(10) 0.0947(11) 0.0262(9) -0.0300(7) -0.0010(7)  
C12 0.0546(6) 0.0986(9) 0.1013(11) 0.0351(8) -0.0167(6) 0.0079(6)  
C1 0.0414(18) 0.052(2) 0.049(2) 0.0067(17) 0.0050(16) 0.0029(15)  
C2 0.0388(19) 0.066(2) 0.062(3) 0.010(2) 0.0058(17) 0.0032(17)  
C3 0.0379(18) 0.069(2) 0.058(3) 0.007(2) -0.0051(17) -0.0058(17)  
C4 0.0399(17) 0.0445(18) 0.052(2) 0.0041(16) -0.0057(15) -0.0010(14)  
C5 0.0425(17) 0.0427(16) 0.049(2) 0.0029(15) -0.0053(16) 0.0002(13)  
C6 0.0456(18) 0.0467(19) 0.049(2) 0.0016(16) -0.0070(17) -0.0059(14)  
C7 0.0417(18) 0.052(2) 0.057(2) 0.0077(18) -0.0081(17) -0.0015(15)  
C8 0.0412(18) 0.067(2) 0.053(2) 0.012(2) -0.0047(17) -0.0032(16)  
C9 0.051(2) 0.087(3) 0.059(3) 0.003(2) -0.014(2) -0.016(2)  
C10 0.078(3) 0.063(3) 0.071(3) -0.006(2) -0.016(3) -0.021(2)  
C11 0.064(2) 0.045(2) 0.071(3) 0.002(2) -0.009(2) -0.0065(17)  
C12 0.0457(18) 0.0442(18) 0.051(2) 0.0027(16) -0.0085(16) 0.0003(14)  
C13 0.059(2) 0.055(2) 0.050(2) -0.0021(18) -0.0114(19) 0.0009(17)  
C14 0.066(2) 0.058(2) 0.043(2) -0.0075(19) 0.0000(19) 0.0043(18)  
C15 0.054(2) 0.0478(19) 0.049(2) -0.0034(17) 0.0015(17) 0.0048(15)  
C16 0.055(2) 0.056(2) 0.056(3) -0.0109(19) 0.0095(18) 0.0044(17)  
C17 0.0440(18) 0.060(2) 0.062(3) -0.008(2) 0.0066(18) 0.0063(16)  
C18 0.0429(18) 0.0437(18) 0.061(3) -0.0024(17) 0.0017(17) 0.0049(14)  
C19 0.0391(19) 0.060(2) 0.071(3) -0.002(2) 0.0065(19) 0.0049(15)  
C20 0.0365(18) 0.066(2) 0.067(3) 0.005(2) -0.0071(18) 0.0007(16)  
C21 0.0395(17) 0.053(2) 0.053(2) 0.0034(17) -0.0057(16) -0.0021(15)  
C22 0.0457(19) 0.056(2) 0.051(2) 0.0020(18) -0.0093(17) -0.0067(15)  
C23 0.0448(19) 0.064(2) 0.048(2) 0.0003(18) -0.0052(17) -0.0044(17)  
C24 0.048(2) 0.068(3) 0.061(3) 0.006(2) -0.0088(19) -0.0056(18)  
C25 0.0426(18) 0.083(3) 0.057(3) 0.005(2) -0.0049(19) -0.0047(19)  
C26 0.052(2) 0.088(3) 0.062(3) -0.007(3) -0.008(2) -0.010(2)  
C27 0.066(3) 0.069(3) 0.075(3) -0.006(3) -0.009(2) -0.015(2)  
C28 0.057(2) 0.062(2) 0.065(3) 0.003(2) -0.009(2) -0.0064(19)  
C29 0.0440(19) 0.059(2) 0.051(2) 0.0051(19) -0.0082(17) -0.0049(16)  
C30 0.057(2) 0.073(3) 0.052(3) -0.007(2) -0.0046(19) -0.0119(19)  
C31 0.064(2) 0.073(3) 0.050(3) -0.017(2) 0.0034(19) -0.004(2)  
C32 0.056(2) 0.052(2) 0.044(2) -0.0017(17) 0.0014(17) 0.0006(16)  
C33 0.056(2) 0.059(2) 0.045(2) -0.0010(18) 0.0091(18) 0.0060(17)  
C34 0.0438(18) 0.066(2) 0.047(2) 0.0042(19) 0.0074(16) 0.0099(16)

\_geom\_special\_details

;

All esds (except the esd in the dihedral angle between two l.s. planes) are estimated using the full covariance matrix. The cell esds are taken into account individually in the estimation of esds in distances, angles and torsion angles; correlations between esds in cell parameters are only used when they are defined by crystal symmetry. An approximate (isotropic) treatment of cell esds is used for estimating esds involving l.s. planes.

;

loop\_

\_geom\_bond\_atom\_site\_label\_1

\_geom\_bond\_atom\_site\_label\_2

\_geom\_bond\_distance

\_geom\_bond\_site\_symmetry\_2

\_geom\_bond\_publ\_flag

S1 C1 1.736(4) . ?  
S1 C4 1.747(4) . ?  
S2 C18 1.744(4) . ?  
S2 C21 1.747(4) . ?  
S3 C15 1.741(4) . ?  
S3 C12 1.747(4) . ?  
S4 C32 1.748(4) . ?  
S4 C29 1.753(4) . ?  
C11 C25 1.734(5) . ?  
C12 C8 1.741(4) . ?  
C1 C34 1.389(7) . ?  
C1 C2 1.412(6) . ?  
C2 C3 1.356(7) . ?  
C2 H2 0.9500 . ?  
C3 C4 1.401(5) . ?  
C3 H3 0.9500 . ?  
C4 C5 1.399(6) . ?  
C5 C12 1.410(5) . ?  
C5 C6 1.498(5) . ?  
C6 C7 1.387(6) . ?  
C6 C11 1.400(6) . ?  
C7 C8 1.387(6) . ?  
C7 H7 0.9500 . ?  
C8 C9 1.368(7) . ?  
C9 C10 1.390(7) . ?  
C9 H9 0.9500 . ?  
C10 C11 1.369(7) . ?  
C10 H10 0.9500 . ?  
C11 H11 0.9500 . ?  
C12 C13 1.401(7) . ?  
C13 C14 1.363(6) . ?  
C13 H13 0.9500 . ?  
C14 C15 1.401(6) . ?  
C14 H14 0.9500 . ?  
C15 C16 1.401(5) . ?



C16 C17 1.380(6) . ?  
C16 H16 0.9500 . ?  
C17 C18 1.407(7) . ?  
C17 H17 0.9500 . ?  
C18 C19 1.406(6) . ?  
C19 C20 1.355(7) . ?  
C19 H19 0.9500 . ?  
C20 C21 1.419(6) . ?  
C20 H20 0.9500 . ?  
C21 C22 1.397(7) . ?  
C22 C29 1.405(6) . ?  
C22 C23 1.510(5) . ?  
C23 C24 1.371(6) . ?  
C23 C28 1.395(6) . ?  
C24 C25 1.421(6) . ?  
C24 H24 0.9500 . ?  
C25 C26 1.358(7) . ?  
C26 C27 1.364(7) . ?  
C26 H26 0.9500 . ?  
C27 C28 1.383(6) . ?  
C27 H27 0.9500 . ?  
C28 H28 0.9500 . ?  
C29 C30 1.405(7) . ?  
C30 C31 1.368(6) . ?  
C30 H30 0.9500 . ?  
C31 C32 1.405(6) . ?  
C31 H31 0.9500 . ?  
C32 C33 1.396(6) . ?  
C33 C34 1.388(6) . ?  
C33 H33 0.9500 . ?  
C34 H34 0.9500 . ?

loop\_

\_geom\_angle\_atom\_site\_label\_1  
\_geom\_angle\_atom\_site\_label\_2  
\_geom\_angle\_atom\_site\_label\_3  
\_geom\_angle  
\_geom\_angle\_site\_symmetry\_1  
\_geom\_angle\_site\_symmetry\_3  
\_geom\_angle\_publ\_flag  
C1 S1 C4 93.07(19) . . ?  
C18 S2 C21 93.2(2) . . ?  
C15 S3 C12 93.3(2) . . ?  
C32 S4 C29 93.6(2) . . ?  
C34 C1 C2 122.8(4) . . ?  
C34 C1 S1 128.5(3) . . ?  
C2 C1 S1 108.6(3) . . ?  
C3 C2 C1 114.9(4) . . ?  
C3 C2 H2 122.5 . . ?  
C1 C2 H2 122.5 . . ?  
C2 C3 C4 114.3(4) . . ?  
C2 C3 H3 122.8 . . ?  
C4 C3 H3 122.8 . . ?  
C5 C4 C3 126.5(4) . . ?  
C5 C4 S1 124.4(3) . . ?  
C3 C4 S1 109.1(3) . . ?  
C4 C5 C12 127.7(4) . . ?  
C4 C5 C6 115.7(3) . . ?

C12 C5 C6 116.6(4) . . ?  
C7 C6 C11 118.6(4) . . ?  
C7 C6 C5 120.9(3) . . ?  
C11 C6 C5 120.5(4) . . ?  
C8 C7 C6 119.7(4) . . ?  
C8 C7 H7 120.2 . . ?  
C6 C7 H7 120.2 . . ?  
C9 C8 C7 122.0(4) . . ?  
C9 C8 C12 119.1(3) . . ?  
C7 C8 C12 118.9(3) . . ?  
C8 C9 C10 118.1(4) . . ?  
C8 C9 H9 120.9 . . ?  
C10 C9 H9 120.9 . . ?  
C11 C10 C9 121.2(4) . . ?  
C11 C10 H10 119.4 . . ?  
C9 C10 H10 119.4 . . ?  
C10 C11 C6 120.5(4) . . ?  
C10 C11 H11 119.8 . . ?  
C6 C11 H11 119.8 . . ?  
C13 C12 C5 126.7(4) . . ?  
C13 C12 S3 108.8(3) . . ?  
C5 C12 S3 124.5(3) . . ?  
C14 C13 C12 114.1(4) . . ?  
C14 C13 H13 122.9 . . ?  
C12 C13 H13 122.9 . . ?  
C13 C14 C15 115.4(4) . . ?  
C13 C14 H14 122.3 . . ?  
C15 C14 H14 122.3 . . ?  
C16 C15 C14 123.2(4) . . ?  
C16 C15 S3 128.5(4) . . ?  
C14 C15 S3 108.3(3) . . ?  
C17 C16 C15 136.8(4) . . ?  
C17 C16 H16 111.6 . . ?  
C15 C16 H16 111.6 . . ?  
C16 C17 C18 136.4(4) . . ?  
C16 C17 H17 111.8 . . ?  
C18 C17 H17 111.8 . . ?  
C19 C18 C17 122.8(4) . . ?  
C19 C18 S2 108.7(3) . . ?  
C17 C18 S2 128.4(3) . . ?  
C20 C19 C18 115.1(4) . . ?  
C20 C19 H19 122.4 . . ?  
C18 C19 H19 122.4 . . ?  
C19 C20 C21 114.3(4) . . ?  
C19 C20 H20 122.8 . . ?  
C21 C20 H20 122.8 . . ?  
C22 C21 C20 126.6(4) . . ?  
C22 C21 S2 124.7(3) . . ?  
C20 C21 S2 108.5(3) . . ?  
C21 C22 C29 127.8(4) . . ?  
C21 C22 C23 116.0(4) . . ?  
C29 C22 C23 116.0(4) . . ?  
C24 C23 C28 119.7(4) . . ?  
C24 C23 C22 121.4(4) . . ?  
C28 C23 C22 118.9(4) . . ?  
C23 C24 C25 118.4(4) . . ?  
C23 C24 H24 120.8 . . ?  
C25 C24 H24 120.8 . . ?

C26 C25 C24 121.5(4) . . ?  
C26 C25 C11 120.0(4) . . ?  
C24 C25 C11 118.5(4) . . ?  
C25 C26 C27 119.3(4) . . ?  
C25 C26 H26 120.4 . . ?  
C27 C26 H26 120.4 . . ?  
C26 C27 C28 120.9(5) . . ?  
C26 C27 H27 119.6 . . ?  
C28 C27 H27 119.6 . . ?  
C27 C28 C23 120.2(5) . . ?  
C27 C28 H28 119.9 . . ?  
C23 C28 H28 119.9 . . ?  
C22 C29 C30 126.7(4) . . ?  
C22 C29 S4 124.8(4) . . ?  
C30 C29 S4 108.4(3) . . ?  
C31 C30 C29 114.5(4) . . ?  
C31 C30 H30 122.8 . . ?  
C29 C30 H30 122.8 . . ?  
C30 C31 C32 115.4(4) . . ?  
C30 C31 H31 122.3 . . ?  
C32 C31 H31 122.3 . . ?  
C33 C32 C31 123.0(4) . . ?  
C33 C32 S4 128.7(3) . . ?  
C31 C32 S4 108.1(3) . . ?  
C34 C33 C32 135.8(4) . . ?  
C34 C33 H33 112.1 . . ?  
C32 C33 H33 112.1 . . ?  
C33 C34 C1 135.8(4) . . ?  
C33 C34 H34 112.1 . . ?  
C1 C34 H34 112.1 . . ?

loop\_

\_geom\_torsion\_atom\_site\_label\_1  
\_geom\_torsion\_atom\_site\_label\_2  
\_geom\_torsion\_atom\_site\_label\_3  
\_geom\_torsion\_atom\_site\_label\_4  
\_geom\_torsion  
\_geom\_torsion\_site\_symmetry\_1  
\_geom\_torsion\_site\_symmetry\_2  
\_geom\_torsion\_site\_symmetry\_3  
\_geom\_torsion\_site\_symmetry\_4  
\_geom\_torsion\_publ\_flag  
C4 S1 C1 C34 -176.7(4) . . . . ?  
C4 S1 C1 C2 -0.2(3) . . . . ?  
C34 C1 C2 C3 176.9(4) . . . . ?  
S1 C1 C2 C3 0.1(5) . . . . ?  
C1 C2 C3 C4 0.0(6) . . . . ?  
C2 C3 C4 C5 179.3(4) . . . . ?  
C2 C3 C4 S1 -0.1(5) . . . . ?  
C1 S1 C4 C5 -179.3(3) . . . . ?  
C1 S1 C4 C3 0.1(3) . . . . ?  
C3 C4 C5 C12 -173.0(4) . . . . ?  
S1 C4 C5 C12 6.3(6) . . . . ?  
C3 C4 C5 C6 7.0(6) . . . . ?  
S1 C4 C5 C6 -173.8(3) . . . . ?  
C4 C5 C6 C7 69.9(5) . . . . ?  
C12 C5 C6 C7 -110.1(5) . . . . ?  
C4 C5 C6 C11 -110.1(5) . . . . ?

C12 C5 C6 C11 69.9(5) . . . . ?  
C11 C6 C7 C8 0.0(7) . . . . ?  
C5 C6 C7 C8 180.0(4) . . . . ?  
C6 C7 C8 C9 0.6(7) . . . . ?  
C6 C7 C8 C12 -178.5(4) . . . . ?  
C7 C8 C9 C10 -0.5(8) . . . . ?  
C12 C8 C9 C10 178.6(4) . . . . ?  
C8 C9 C10 C11 -0.1(9) . . . . ?  
C9 C10 C11 C6 0.7(9) . . . . ?  
C7 C6 C11 C10 -0.6(8) . . . . ?  
C5 C6 C11 C10 179.4(5) . . . . ?  
C4 C5 C12 C13 -178.1(4) . . . . ?  
C6 C5 C12 C13 1.9(6) . . . . ?  
C4 C5 C12 S3 2.7(6) . . . . ?  
C6 C5 C12 S3 -177.2(3) . . . . ?  
C15 S3 C12 C13 -1.3(3) . . . . ?  
C15 S3 C12 C5 178.1(3) . . . . ?  
C5 C12 C13 C14 -178.0(4) . . . . ?  
S3 C12 C13 C14 1.3(5) . . . . ?  
C12 C13 C14 C15 -0.7(6) . . . . ?  
C13 C14 C15 C16 -179.5(4) . . . . ?  
C13 C14 C15 S3 -0.3(5) . . . . ?  
C12 S3 C15 C16 -179.9(4) . . . . ?  
C12 S3 C15 C14 0.9(3) . . . . ?  
C14 C15 C16 C17 179.3(5) . . . . ?  
S3 C15 C16 C17 0.3(8) . . . . ?  
C15 C16 C17 C18 -0.1(10) . . . . ?  
C16 C17 C18 C19 -173.0(5) . . . . ?  
C16 C17 C18 S2 3.0(8) . . . . ?  
C21 S2 C18 C19 4.1(3) . . . . ?  
C21 S2 C18 C17 -172.3(4) . . . . ?  
C17 C18 C19 C20 173.2(4) . . . . ?  
S2 C18 C19 C20 -3.4(5) . . . . ?  
C18 C19 C20 C21 0.6(6) . . . . ?  
C19 C20 C21 C22 -173.1(4) . . . . ?  
C19 C20 C21 S2 2.5(5) . . . . ?  
C18 S2 C21 C22 171.9(4) . . . . ?  
C18 S2 C21 C20 -3.8(3) . . . . ?  
C20 C21 C22 C29 175.4(4) . . . . ?  
S2 C21 C22 C29 0.5(6) . . . . ?  
C20 C21 C22 C23 0.5(6) . . . . ?  
S2 C21 C22 C23 -174.4(3) . . . . ?  
C21 C22 C23 C24 -78.5(6) . . . . ?  
C29 C22 C23 C24 105.9(5) . . . . ?  
C21 C22 C23 C28 100.8(5) . . . . ?  
C29 C22 C23 C28 -74.7(6) . . . . ?  
C28 C23 C24 C25 -1.2(7) . . . . ?  
C22 C23 C24 C25 178.2(4) . . . . ?  
C23 C24 C25 C26 -0.9(8) . . . . ?  
C23 C24 C25 C11 -179.9(4) . . . . ?  
C24 C25 C26 C27 1.8(8) . . . . ?  
C11 C25 C26 C27 -179.2(4) . . . . ?  
C25 C26 C27 C28 -0.6(8) . . . . ?  
C26 C27 C28 C23 -1.4(8) . . . . ?  
C24 C23 C28 C27 2.3(8) . . . . ?  
C22 C23 C28 C27 -177.0(5) . . . . ?  
C21 C22 C29 C30 -177.7(4) . . . . ?  
C23 C22 C29 C30 -2.8(7) . . . . ?

C21 C22 C29 S4 0.7(6) . . . . ?  
C23 C22 C29 S4 175.6(3) . . . . ?  
C32 S4 C29 C22 -178.0(4) . . . . ?  
C32 S4 C29 C30 0.7(4) . . . . ?  
C22 C29 C30 C31 178.4(4) . . . . ?  
S4 C29 C30 C31 -0.2(5) . . . . ?  
C29 C30 C31 C32 -0.4(7) . . . . ?  
C30 C31 C32 C33 177.0(4) . . . . ?  
C30 C31 C32 S4 0.9(6) . . . . ?  
C29 S4 C32 C33 -176.7(4) . . . . ?  
C29 S4 C32 C31 -0.9(4) . . . . ?  
C31 C32 C33 C34 -179.4(5) . . . . ?  
S4 C32 C33 C34 -4.2(8) . . . . ?  
C32 C33 C34 C1 -7.9(10) . . . . ?  
C2 C1 C34 C33 -177.8(5) . . . . ?  
S1 C1 C34 C33 -1.7(8) . . . . ?

\_diffrn\_measured\_fraction\_theta\_max 0.993  
\_diffrn\_reflns\_theta\_full 72.40  
\_diffrn\_measured\_fraction\_theta\_full 0.993  
\_refine\_diff\_density\_max 0.397  
\_refine\_diff\_density\_min -0.321  
\_refine\_diff\_density\_rms 0.065
